# Supplementary material for: Synthesis and biological evaluation of the new ring system benzo[f]pyrimido[1,2-d][1,2,3]triazolo[1,5-a][1,4]diazepine and its cycloalkane and cycloalkene condensed analogues
Source: Royal Society of Chemistry journal article supplement (doi:10.1039/d0ra10553h), 2021-01-01

## Supplementary Information

### Synthesis and biological evaluation of the new ring system benzo[*f*]pyrimido[1,2-*d*][1,2,3]triazolo[1,5-*a*][1,4]-diazepine and its cycloalkane and cycloalkene condensed analogues

Mohamed El Haimer,<sup>a</sup> Márta Palkó,<sup>\*a</sup> Matti Haukka,<sup>b</sup> Márió Gajdács,<sup>c</sup> István Zupkó<sup>c</sup> and Ferenc Fülöp<sup>a,d</sup>

#### Address

- a Institute of Pharmaceutical Chemistry, University of Szeged, Interdisciplinary excellence centre, Eötvös utca 6, Szeged H-6720, Hungary
- b Department of Chemistry, University of Jyväskylä, FIN-40014 Turku, Finland
- c Pharmacodynamics and Biopharmacy, University of Szeged, Interdisciplinary excellence centre, Eötvös utca 6, Szeged H-6720, Hungary
- d MTA-SZTE Stereochemistry Research Group, Hungarian Academy of Sciences, Eötvös utca 6, Szeged H-6720, Hungary  
E-mail: palko.marta@szte.hu

#### Contents

|                                                                                                      |     |
|------------------------------------------------------------------------------------------------------|-----|
| 1. Experimental Procedures and Analytical Data.....                                                  | S2  |
| 2. References.....                                                                                   | S14 |
| 3. Copies of <sup>1</sup> H- and <sup>13</sup> C NMR spectra of (±)- <b>3-19</b> .....               | S15 |
| 4. HPLC chromatograms of domino products (±)- <b>17a</b> , (+)- <b>17a</b> and (-)- <b>17a</b> ..... | S43 |
| 5. X-ray crystallography data for (±)- <b>5a</b> , (±)- <b>6a</b> and (±)- <b>17c</b> .....          | S44 |
| 6. Copies of HRMS-ESI Spectra of (±)- <b>3-19</b> .....                                              | S45 |

## 1. Experimental Procedures and Analytical Data

### General Methods

<sup>1</sup>H NMR spectra were recorded at 500.20 MHz, while <sup>13</sup>C NMR spectra were measured at 125.62 MHz in CDCl<sub>3</sub> or in DMSO-d<sub>6</sub> at ambient temperature, with a Bruker AV NEO Ascend 500 spectrometer (Bruker Biospin, Karlsruhe, Germany) with Double Resonance Broad Band Probe (BBO). Chemical shifts are given in δ (ppm), relative to tetramethylsilane (TMS) as internal standard. Elemental analyses were performed with a Perkin–Elmer CHNS-2400 Ser II Elemental Analyzer. The HRMS flow injection analysis was performed with Thermo Scientific Q Exactive Plus hybrid quadrupole-Orbitrap (Thermo Fisher Scientific, Waltham, MA, USA) mass spectrometer coupled to a Waters Acquity I-Class UPLC™ (Waters, Manchester, UK). Optical rotations were measured with a Perkin–Elmer 341 polarimeter (Perkin–Elmer, Shelton, CT, USA). Melting points were determined with a Hinotex-X4 micro melting point apparatus (Hinotek, Ningbo, China) and are uncorrected.

Racemic Boc-protected amino acids [(±)-**1**, (±)-**2**, (±)-**7**, (±)-**8**, (±)-**13**, and (±)-**14**] were prepared according to a literature procedure.<sup>1</sup> Racemic (±)-**15** and (±)-**16** and enantiomers (+)-**15** and (–)-**15** and (±)-**22**, (±)-**23**, (±)-**24**, and (±)-**25** were prepared according to the procedure described in our previous work.<sup>2</sup> 16,16a-dihydrobenzo[5,6][1,2,3]triazolo[5',1':3,4][1,4]-diazepino[7,1-*b*]-quinazolin-11(9*H*)-one (**20**) and 6-(prop-2-yn-1-yl)-6,6a-dihydroisindolo[2,1-*a*]quinazoline-5,11-dione (**21**) were prepared according to a literature procedure.<sup>3,4</sup>

The enantiomers of Boc-protected amino acids (+)-**13** and (–)-**13** were prepared following a previously published work.<sup>2</sup> The *ee* values of (+)-**13**, (–)-**13**, (+)-**15**, and (–)-**15** were determined by a literature method.<sup>2</sup> The *ee* values for (+)-**17a** (84%) and (–)-**17a** (95%) were determined by HPLC using Phenomenex-IA column (eluent: a mixture of *n*-hexane and IPA (60:40), flow rate: 0.5 mL·min<sup>-1</sup>, detection by PDA detector, retention times (–)-**17a**: 9.98 min, (+)-**17a**: 28.77 min).

The crystals of (±)-**5a**, (±)-**6a**, and (±)-**17c**, were immersed in cryo-oil, mounted in a loop, and measured at a temperature of 120 K. The X-ray diffraction data were collected on a Rigaku Oxford Diffraction Supernova diffractometer using CuKα radiation. The *CrysAlisPro*<sup>5</sup> software package was used for cell refinements and data reductions. An analytical absorption correction (*CrysAlisPro*<sup>5</sup>) was applied to the intensities before structure solutions. The structures were solved by intrinsic phasing (*SHELXT*<sup>6</sup>) method. Structural refinements were carried out using *SHELXL*<sup>6</sup> software with *SHELXLE*<sup>7</sup> graphical user interface. The NH hydrogen atoms were located from the difference Fourier map and refined isotropically. All other hydrogen atoms were positioned geometrically and constrained to ride on their parent atoms, with C–H = 0.95–1.00 Å and U<sub>iso</sub> = 1.2·U<sub>eq</sub>(parent atom).

### General procedure for the Boc-protected propargyl amide synthesis

A mixture of the appropriate Boc-protected amino acid [(±)-**1**, (±)-**2**, (±)-**7**, (±)-**8**, (±)-**13**, (±)-**14**, (+)-**13** or (–)-**13**, 10 mmol], hydroxybenzotriazole (1.83 g, 12 mmol), *N,N'*-diisopropylcarbodiimide (DIC) (1.51 g, 12 mmol), and propargylamine (0.55 g, 0.7 mL, 10 mmol) was stirred in THF (50 mL) overnight at r.t. After completion of the reaction (checked by thin layer chromatography), the solvent was evaporated. Purification of the residue by column chromatography over silica gel with EtOAc gave the desired products.

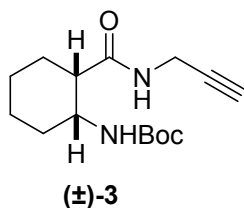

**tert-Butyl (cis-2-(prop-2-yn-1-ylcarbamoyl)cyclohexyl)carbamate (±)-3:** White crystals (84% yield), m.p. 118–121 °C, ( $R_f$  = 0.90, EtOAc)  $^1\text{H-NMR}$  (500.20 MHz,  $\text{CDCl}_3$ , 30 °C):  $\delta$  = 1.43 (s, 9H), 1.54–1.62 (m, 3H), 1.68–1.82 (m, 2H), 1.89–1.97 (m, 1H), 2.50 (t, 1H,  $J$  = 2.4 Hz), 2.61 (s, 1H), 3.81–3.90 (m, 1H), 3.95–4.09 (m, 2H), 5.27 (d, 1H,  $J$  = 7.2 Hz), 6.09 (s, 1H);  $^{13}\text{C NMR}$  (125.62 MHz,  $\text{CDCl}_3$ , 30 °C):  $\delta$  = 22.7, 26.6, 25.1, 28.3, 29.0, 29.7, 29.9, 44.3, 45.2, 48.9, 71.4, 79.5, 155.7, 173.2 ppm;  $\text{C}_{15}\text{H}_{24}\text{N}_2\text{O}_3$  (280.36): calcd. C, 64.26; H, 8.63; N, 9.99; found C, 64.05; H, 8.32; N, 9.75. HRMS-ESI  $[\text{M}+\text{H}]^+m/z$  calcd for  $\text{C}_{15}\text{H}_{24}\text{N}_2\text{O}_3$ : 281.18597, found 281.18626.

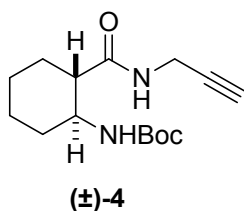

**tert-Butyl (trans-2-(prop-2-yn-1-ylcarbamoyl)cyclohexyl)carbamate (±)-4:** White crystals (84% yield), m.p. 142–145 °C, ( $R_f$  = 0.90, EtOAc)  $^1\text{H-NMR}$  (500.20 MHz,  $\text{CDCl}_3$ , 30 °C):  $\delta$  = 1.18–1.27 (m, 1H), 1.30–1.37 (m, 2H), 1.42 (s, 9H), 1.72–1.79 (m, 2H), 1.93–2.05 (m, 2H), 2.17 (t, 1H,  $J$  = 2.4 Hz), 2.31 (s, 1H), 3.44–3.53 (m, 1H), 3.93–4.07 (m, 2H), 4.73 (d, 1H,  $J$  = 8.1 Hz), 6.49 (s, 1H);  $^{13}\text{C NMR}$  (125.62 MHz,  $\text{CDCl}_3$ , 30 °C):  $\delta$  = 23.3, 24.9, 25.1, 28.3, 29.1, 30.1, 33.2, 42.5, 51.3, 51.7, 71.2, 79.7, 155.8, 173.8 ppm;  $\text{C}_{15}\text{H}_{24}\text{N}_2\text{O}_3$  (280.36): calcd. C, 64.26; H, 8.63; N, 9.99; found C, 64.04; H, 8.41; N, 9.87. HRMS-ESI  $[\text{M}+\text{H}]^+m/z$  calcd for  $\text{C}_{15}\text{H}_{24}\text{N}_2\text{O}_3$ : 281.18597, found 281.18597.

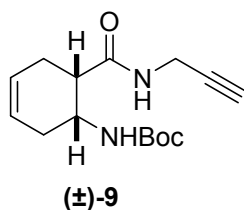

**tert-Butyl (cis-6-(prop-2-yn-1-ylcarbamoyl)cyclohex-3-en-1-yl)carbamate (±)-9:** White crystals (74% yield), m.p. 160–163 °C, ( $R_f$  = 0.90, EtOAc),  $^1\text{H-NMR}$  (500.20 MHz,  $\text{CDCl}_3$ , 30 °C):  $\delta$  = 1.44 (s, 1H), 2.09–2.17 (m, 1H), 2.19 (t, 1H,  $J$  = 2.4 Hz), 2.24–2.32 (m, 1H), 2.38–2.76 (m, 1H), 2.49–2.58 (m, 1H), 2.68–2.74 (m, 1H), 3.97–4.08 (m, 2H), 4.17 (s, 1H), 5.20 (s, 1H), 5.64–5.70 (m, 1H), 5.70–5.77 (m, 1H), 6.69 (s, 1H);  $^{13}\text{C NMR}$  (125.62 MHz,  $\text{CDCl}_3$ , 30 °C):  $\delta$  = 25.5, 28.3, 29.1, 31.4, 43.2, 45.7, 71.3, 79.5, 79.8, 125.1, 125.3, 156.1, 172.6 ppm;  $\text{C}_{15}\text{H}_{22}\text{N}_2\text{O}_3$  (278.35): calcd. C, 64.73; H, 7.97; N, 10.06; found C, 64.79; H, 8.02; N, 10.10. HRMS-ESI  $[\text{M}+\text{H}]^+m/z$  calcd for  $\text{C}_{15}\text{H}_{22}\text{N}_2\text{O}_3$ : 279,17032, found 279,17086.

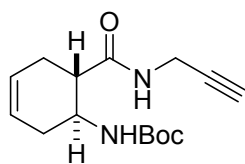

**(±)-10**

**tert-Butyl (*trans*-6-(prop-2-yn-1-ylcarbamoyl)cyclohex-3-en-1-yl)carbamate (±)-10:** White crystals (72% yield), m.p. 128–130 °C, ( $R_f = 0.90$ , EtOAc),  $^1\text{H-NMR}$  (500 MHz,  $\text{CDCl}_3$ , 30 °C):  $\delta = 1.43$  (s, 1H), 1.71 (s, 1H), 2.18 (t, 1H,  $J = 2.6$  Hz), 2.29–2.44 (m, 3H), 2.77 (s, 1H), 3.68–3.77 (m, 1H), 3.95–4.08 (m, 2H), 4.83 (d, 1H,  $J = 7.3$  Hz), 5.57–5.63 (m, 1H), 5.63–5.69 (m, 1H), 6.38 (s, 1H),  $^{13}\text{C NMR}$  (125.62 MHz,  $\text{CDCl}_3$ , 30 °C):  $\delta = 28.3$ , 28.8, 29.2, 31.5, 46.6, 48.5, 71.4, 79.5, 79.7, 124.5, 125.3, 155.8, 173.5 ppm,  $\text{C}_{15}\text{H}_{22}\text{N}_2\text{O}_3$  (278.35): calcd. C, 64.73; H, 7.97; N, 10.06; found C, 64.76; H, 7.98; N, 10.08. HRMS-ESI  $[\text{M}+\text{H}]^+m/z$  calcd for  $\text{C}_{15}\text{H}_{22}\text{N}_2\text{O}_3$ : 279,17032, found 279,17086.

### General procedure for domino-ring closure reaction

The mixture of the appropriate Boc-protected amides [(±)-3, (±)-4, (±)-9, (±)-10, (±)-15, (±)-16, (+)-15 or (–)-15, 0.60 mmol] was deprotected by a 10% aqueous HCl solution (10 mL) at r.t. for 6 h. The aqueous layer was neutralized with 10% aqueous NaOH solution and extracted with  $\text{CH}_2\text{Cl}_2$  (3 × 30 mL). The combined organic phase was dried ( $\text{Na}_2\text{SO}_4$ ) and the solvent was evaporated. The resulting amides were used in the next step without purification. The appropriate azide derivative (1.2 eq, 0.72 mmol) was added to the free amide in a round-bottom flask equipped with a stir bar and dissolved in EtOH (5 mL, 0.12 M). Iodine ( $\text{I}_2$ ; 15 mg, 0.06 mmol or catalytic amount of *p*-TSA) was added in one portion and the resulting solution was stirred at reflux for 2h. Afterwards, the solvent was evaporated and the crude product was crystallized in  $\text{Et}_2\text{O}$  and recrystallized in *i*Pr<sub>2</sub>O–EtOH (5:1, 6 mL).

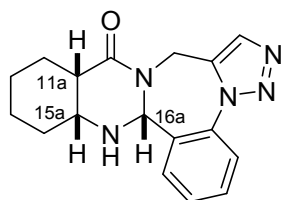

**(±)-5a**

### (*r*-11a,*c*-15a,*c*-16a)-11a,12,13,14,15,15a,16,16a-

**Octahydrobenzo[5,6][1,2,3]triazolo[5',1':3,4][1,4]diazepino[7,1-*b*]quinazolin-11(9*H*)-one (±)-5a:** Light brown crystals (76% yield), m.p. 170–172 °C, ( $R_f = 0.45$ , EtOAc),  $^1\text{H-NMR}$  (500.20 MHz, DMSO, 30 °C):  $\delta = 1.20$ –1.32 (m, 2H), 1.37–1.45 (m, 1H), 1.45–1.54 (m, 1H), 1.65–1.75 (m, 4H), 1.77–1.88 (m, 1H), 2.20–2.27 (m, 1H), 3.19 (s, 1H), 3.26 (s, 1H), 3.36 (d, 1H,  $J = 15.4$  Hz), 4.99 (d, 1H,  $J = 5.4$  Hz), 5.51 (d, 1H,  $J = 15.4$  Hz), 7.65–7.72 (m, 1H), 7.81–7.86 (m, 1H), 8.00 (s, 1H), 8.11–8.16 (m, 1H),  $^{13}\text{C NMR}$  (125.62 MHz,  $\text{CDCl}_3$ , 30 °C):  $\delta = 20.3$ , 25.5, 25.8, 34.3, 43.0, 49.9, 69.5, 123.1, 128.6, 129.9, 130.6, 131.5, 133.1, 133.2, 134.8, 171.2 ppm,  $\text{C}_{17}\text{H}_{19}\text{N}_5\text{O}$  (309.37): calcd. C, 66.00; H, 6.19; N, 22.64; found C, 66.29; H, 6.16; N, 22.44. HRMS-ESI  $[\text{M}+\text{H}]^+m/z$  calcd for  $\text{C}_{17}\text{H}_{19}\text{N}_5\text{O}$ : 310,16624, found 310,16645.



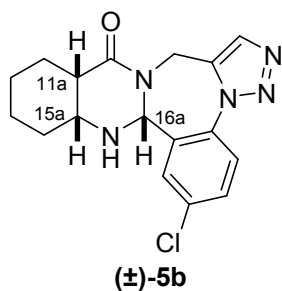

**(*r*-11a,*c*-15a,*c*-16a)-2-Chloro-11a,12,13,14,15,15a,16,16a-**

**octahydrobenzo[5,6][1,2,3]triazolo[5',1':3,4][1,4]diazepino[7,1-*b*]quinazolin-11(9*H*)-one (±)-5b:**

Light brown crystals (73% yield), m.p. 178–183 °C, ( $R_f$  = 0.45, EtOAc),  $^1\text{H-NMR}$  (500.20 MHz,  $\text{CDCl}_3$ , 30 °C):  $\delta$  = 1.30–1.42 (m, 1H), 1.59 (s, 1H), 1.65–1.72 (m, 1H), 1.72–1.80 (m, 2H), 1.84–1.92 (m, 2H), 1.92–2.00 (m, 1H), 2.38–2.44 (m, 1H), 3.32 (s, 1H), 3.65 (d, 1H,  $J$  = 15.1 Hz), 5.10 (s, 1H), 5.69 (d, 1H,  $J$  = 15.1 Hz), 7.57–7.62 (m, 1H), 7.77 (s, 1H), 7.84 (d, 1H,  $J$  = 8.5 Hz), 8.00 (d, 1H,  $J$  = 2.2 Hz),  $^{13}\text{C NMR}$  (125.62 MHz,  $\text{CDCl}_3$ , 30 °C):  $\delta$  = 20.2, 25.3, 25.9, 30.7, 34.4, 43.2, 50.3, 68.9, 124.5, 127.5, 130.6, 132.2, 132.3, 132.9, 133.4, 135.8, 171.5 ppm,  $\text{C}_{17}\text{H}_{18}\text{ClN}_5\text{O}$  (343.83): calcd. C, 59.39; H, 5.28; Cl, 10.31; N, 20.37; found C, 59.43; H, 5.29; Cl, 10.33; N, 20.39. HRMS-ESI  $[\text{M}+\text{H}]^+m/z$  calcd for  $\text{C}_{17}\text{H}_{18}\text{ClN}_5\text{O}$ : 344.12726, found 344.12796.

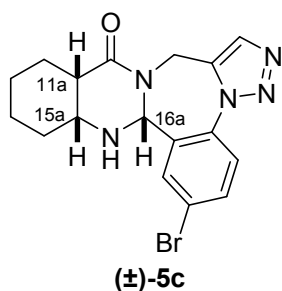

**(*r*-11a,*c*-15a,*c*-16a)-2-Bromo-11a,12,13,14,15,15a,16,16a-**

**octahydrobenzo[5,6][1,2,3]triazolo[5',1':3,4][1,4]diazepino[7,1-*b*]quinazolin-11(9*H*)-one (±)-5c:**

Light brown crystals (72% yield), m.p. 247–252 °C, ( $R_f$  = 0.45, EtOAc),  $^1\text{H-NMR}$  (500.20 MHz,  $\text{CDCl}_3$ , 30 °C):  $\delta$  = 1.30–1.42 (m, 1H), 1.53 (s, 2H), 1.56–1.62 (m, 1H), 1.65–1.81 (m, 4H), 1.82–1.92 (m, 2H), 1.95 (s, 1H), 2.41 (d, 1H,  $J$  = 12.1 Hz), 3.32 (s, 1H), 3.65 (d, 1H,  $J$  = 15.3 Hz), 5.10 (s, 1H), 5.69 (d, 1H,  $J$  = 15.3 Hz), 7.77 (s, 3H), 8.14 (s, 1H),  $^{13}\text{C NMR}$  (125.62 MHz,  $\text{CDCl}_3$ , 30 °C):  $\delta$  = 20.3, 25.3, 25.9, 30.7, 34.4, 40.4, 43.2, 68.9, 123.7, 124.7, 130.5, 132.2, 132.4, 133.0, 133.6, 133.9, 171.5 ppm,  $\text{C}_{17}\text{H}_{18}\text{BrN}_5\text{O}$  (388.27): calcd. C, 52.59; H, 4.67; N, 18.04; found C, 52.58; H, 4.74; N, 18.12. HRMS-ESI  $[\text{M}+\text{H}]^+m/z$  calcd for  $\text{C}_{17}\text{H}_{18}\text{BrN}_5\text{O}$ : 388,07675, found 388,07745.

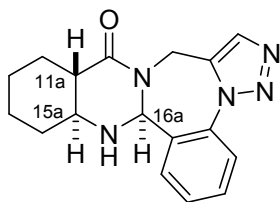

**(±)-6a**

**(*r*-11a,*t*-15a,*t*-16a)-11a,12,13,14,15,15a,16,16a-**

**Octahydrobenzo[5,6][1,2,3]triazolo[5',1':3,4][1,4]diazepino[7,1-*b*]quinazolin-11(9*H*)-one (±)-6a:**

Light brown crystals (74% yield), m.p. 178–183 °C, ( $R_f$  = 0.45, EtOAc),  $^1\text{H-NMR}$  (500.20 MHz,  $\text{CDCl}_3$ , 30 °C):  $\delta$  = 1.13–1.23 (m, 1H), 1.28–1.43 (m, 3H), 1.80–1.96 (m, 4H), 2.01–2.08 (m, 1H), 2.37–2.43 (m, 1H), 2.69–2.76 (m, 1H), 3.65 (d, 1H,  $J$  = 15.3 Hz), 5.17 (d, 1H,  $J$  = 5.5 Hz), 5.75 (d, 1H,  $J$  = 15.3 Hz), 7.57–7.65 (m, 2H), 7.79 (s, 1H), 7.88–7.93 (m, 2H),  $^{13}\text{C NMR}$  (125.62 MHz,  $\text{CDCl}_3$ , 30 °C):  $\delta$  = 24.5, 25.5, 25.7, 32.9, 34.1, 47.6, 56.7, 69.4, 123.3, 126.9, 129.6, 130.2, 130.4, 132.3, 132.8, 134.8, 170.0 ppm,  $\text{C}_{17}\text{H}_{19}\text{N}_5\text{O}$  (309.37): calcd. C, 66.00; H, 6.19; N, 22.64; found C, 65.92; H, 6.21; N, 22.71. HRMS-ESI  $[\text{M}+\text{H}]^+m/z$  calcd for  $\text{C}_{17}\text{H}_{19}\text{N}_5\text{O}$ : 310,16624, found 310,16679.

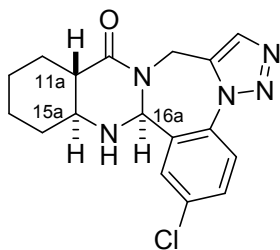

**(±)-6b**

**(*r*-11a,*t*-15a,*t*-16a)-2-Chloro-11a,12,13,14,15,15a,16,16a-**

**octahydrobenzo[5,6][1,2,3]triazolo[5',1':3,4][1,4]diazepino[7,1-*b*]quinazolin-11(9*H*)-one (±)-6b:**

Light brown crystals (73% yield), m.p. 198–202 °C,  $^1\text{H-NMR}$  (500.20 MHz,  $\text{CDCl}_3$ , 30 °C):  $\delta$  = 1.13–1.23 (m, 1H), 1.24–1.35 (m, 3H), 1.80–1.98 (m, 4H), 2.01–2.10 (m, 1H), 2.35–2.42 (m, 1H), 2.68–2.77 (m, 1H), 3.68 (d, 1H,  $J$  = 15.2 Hz), 5.68 (s, 1H), 5.70 (d, 1H,  $J$  = 15.2 Hz), 7.57–7.61 (m, 1H), 7.77 (s, 1H), 7.85 (d, 1H,  $J$  = 8.4 Hz), 7.96 (d, 1H,  $J$  = 2.1 Hz),  $^{13}\text{C NMR}$  (125.62 MHz,  $\text{CDCl}_3$ , 30 °C):  $\delta$  = 23.4, 24.4, 25.4, 25.6, 32.8, 34.5, 42.1, 47.5, 56.5, 69.1, 124.5, 127.6, 130.6, 132.1, 132.3, 133.0, 133.3, 135.7, 156.9, 169.9 ppm,  $\text{C}_{17}\text{H}_{18}\text{ClN}_5\text{O}$  (343.83): calcd. C, 59.39; H, 5.28; Cl, 10.31; N, 20.37; found C, 59.33; H, 5.33; Cl, 10.37; N, 20.35. HRMS-ESI  $[\text{M}+\text{H}]^+m/z$  calcd for  $\text{C}_{17}\text{H}_{18}\text{ClN}_5\text{O}$ : 344,12726, found 344,12737.

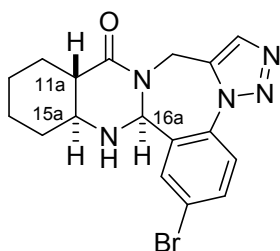

**(±)-6c**

**(*r*-11a,*t*-15a,*t*-16a)-2-Bromo-11a,12,13,14,15,15a,16,16a-**

**octahydrobenzo[5,6][1,2,3]triazolo[5',1':3,4][1,4]diazepino[7,1-*b*]quinazolin-11(9*H*)-one (±)-6c:**

Light brown crystals (69% yield), m.p. 212–218 °C, <sup>1</sup>H-NMR (500 MHz, CDCl<sub>3</sub>, 30 °C): δ = 1.25 (t, 1H), 1.31(t, 2H), 1.36–1.46 (m, 1H), 1.80–1.93 (m, 3H), 2.02–2.09 (m, 2H), 2.38 (d, 1H, *J* = 13.4 Hz), 2.68–2.70 (m, 1H), 3.66 (d, 1H, *J* = 15.1 Hz), 5.14 (s, 1H), 5.70 (d, 1H, *J* = 15.1 Hz), 7.72–7.80 (m, 3H), 8.12 (s, 1H), <sup>13</sup>C NMR (125.62 MHz, CDCl<sub>3</sub>, 30 °C): δ = 20.4, 24.4, 24.8, 25.4, 25.6, 32.8, 34.5, 42.1, 47.4, 56.5, 69.0, 123.6, 124.7, 130.6, 132.3, 133.0, 133.5, 133.8, 169.9 ppm, C<sub>17</sub>H<sub>18</sub>BrN<sub>5</sub>O (388.27): calcd. C, 52.59; H, 4.67; N, 18.04; found C, 52.54; H, 4.75; N, 18.07. HRMS-ESI [M+H]<sup>+</sup>*m/z* calcd for C<sub>17</sub>H<sub>18</sub>BrN<sub>5</sub>O: 388,07626, found 388,07697.

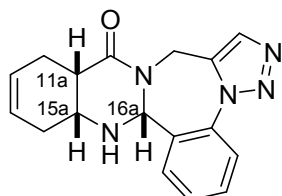

**(±)-11a**

**(*r*-11a,*c*-15a,*c*-16a)-11a,12,15,15a,16,16a-**

**Hexahydrobenzo[5,6][1,2,3]triazolo[5',1':3,4][1,4]diazepino[7,1-*b*]quinazolin-11(9*H*)-one (±)-11a:**

Light brown crystals (77% yield), m.p. 198–203 °C, <sup>1</sup>H-NMR (500 MHz, CDCl<sub>3</sub>, 30 °C): δ = 1.94–2.09 (m, 2H), 2.29–2.38 (m, 1H), 2.45–2.55 (m, 2H), 2.59–2.65 (m, 1H), 3.45 (s, 1H), 3.71 (d, 1H, *J* = 15.2 Hz), 5.19 (s, 1H), 5.65–5.80 (m, 3H), 7.56–7.65 (m, 2H), 7.79 (s, 1H), 7.86–7.92 (m, 2H), <sup>13</sup>C NMR (125.62 MHz, CDCl<sub>3</sub>, 30 °C): δ = 24.8, 30.2, 34.2, 39.1, 48.5, 69.5, 123.3, 123.4, 124.3, 126.8, 129.7, 130.0, 130.5, 132.2, 132.8, 134.8, 171.4 ppm, C<sub>17</sub>H<sub>17</sub>N<sub>5</sub>O (307.36): calcd. C, 66.43; H, 5.58; N, 22.79; found C, 66.35; H, 5.62; N, 22.76. HRMS-ESI [M+H]<sup>+</sup>*m/z* calcd for C<sub>17</sub>H<sub>17</sub>N<sub>5</sub>O: 308,15059, found 308,15069.

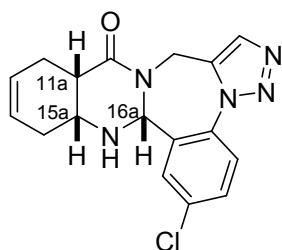

**(±)-11b**

**(*r*-11a,*c*-15a,*c*-16a)-2-Chloro-11a,12,15,15a,16,16a-**

**hexahydrobenzo[5,6][1,2,3]triazolo[5',1':3,4][1,4]diazepino[7,1-*b*]quinazolin-11(9*H*)-one (±)-11b:**

Light brown crystals (71% yield), m.p. 214–217 °C, (*R*<sub>f</sub> = 0.50, EtOAc), <sup>1</sup>H-NMR (500.20 MHz, CDCl<sub>3</sub>, 30 °C): δ = 1.60 (s, 1H), 1.89 (s, 1H), 1.99–2.09 (m, 1H), 2.27–2.39 (m, 1H), 2.43–2.56 (m, 3H), 2.58–2.65 (m, 1H), 3.44 (s, 1H), 3.72 (d, 1H, *J* = 14.4 Hz), 5.17 (s, 1H), 5.66 (d, 1H, *J* = 14.4 Hz), 5.68–5.82 (m, 2H), 7.58–7.62 (m, 1H), 7.78 (s, 1H), 7.85 (d, 1H, *J* = 8.6 Hz), 7.89 (d, 1H, *J* = 2.3 Hz), <sup>13</sup>C NMR (125.62 MHz, CDCl<sub>3</sub>, 30 °C): δ = 24.8, 28.2, 30.1, 34.3, 35.9, 39.2, 48.5, 69.3, 123.1, 123.5, 124.3, 124.6, 127.4, 130.7, 131.7, 131.8, 132.9, 133.4, 135.8, 171.3 ppm, C<sub>17</sub>H<sub>16</sub>ClN<sub>5</sub>O (341.79): calcd. C, 59.74; H, 4.72; Cl, 10.37; N, 20.49; found C, 59.77; H, 4.71; Cl, 10.34; N, 20.54. HRMS-ESI [M+H]<sup>+</sup>*m/z* calcd for C<sub>17</sub>H<sub>16</sub>ClN<sub>5</sub>O: 342,11161, found 342,11145.

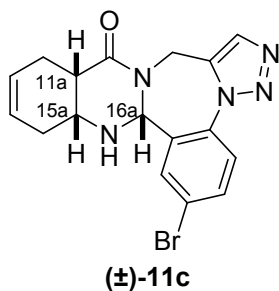

**(*r*-11a,*c*-15a,*c*-16a)-2-Bromo-11a,12,15,15a,16,16a-**

**hexahydrobenzo[5,6][1,2,3]triazolo[5',1':3,4][1,4]diazepino[7,1-*b*]quinazolin-11(9*H*)-one (±)-11c:**

Light brown crystals (71% yield), m.p. 246–248 °C, ( $R_f = 0.50$ , EtOAc),  $^1\text{H-NMR}$  (500.20 MHz,  $\text{CDCl}_3$ , 30 °C):  $\delta = 1.59$  (s, 1H), 1.89 (s, 1H), 1.98–2.09 (m, 1H), 2.27–2.38 (m, 1H), 2.43–2.56 (m, 2H), 2.58–2.65 (m, 1H), 3.44 (s, 1H), 3.73 (d, 1H,  $J = 15.4$  Hz), 5.17 (s, 1H), 5.66 (d, 1H,  $J = 15.4$  Hz), 5.68–5.82 (m, 2H), 7.73–7.80 (m, 3H), 8.04 (d, 1H,  $J = 1.9$  Hz),  $^{13}\text{C NMR}$  (125.62 MHz,  $\text{CDCl}_3$ , 30 °C):  $\delta = 24.8, 30.1, 34.3, 39.2, 48.6, 69.3, 123.1, 123.7, 124.3, 124.6, 124.8, 130.0, 132.2, 132.9, 133.7, 133.8, 171.2$  ppm,  $\text{C}_{17}\text{H}_{16}\text{BrN}_5\text{O}$  (386.25): calcd. C, 52.86; H, 4.18; N, 18.13; found C, 52.81; H, 4.15; N, 18.05. HRMS-ESI  $[\text{M}+\text{H}]^+ m/z$  calcd for  $\text{C}_{17}\text{H}_{16}\text{BrN}_5\text{O}$ : 386,06110, found 386,06188.

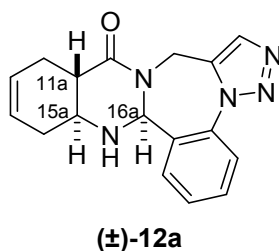

**(*r*-11a,*t*-15a,*t*-16a)-11a,12,15,15a,16,16a-**

**Hexahydrobenzo[5,6][1,2,3]triazolo[5',1':3,4][1,4]diazepino[7,1-*b*]quinazolin-11(9*H*)-one (±)-12a:**

Light brown crystals (75% yield), m.p. 195–199 °C,  $^1\text{H-NMR}$  (500.20 MHz,  $\text{CDCl}_3$ , 30 °C):  $\delta = 2.00$ –2.20 (m, 3H), 2.35–2.43 (m, 2H), 3.02–3.10 (m, 1H), 3.68 (d, 1H,  $J = 15.3$  Hz), 5.20 (d, 1H,  $J = 6.4$  Hz), 5.62–5.81 (m, 3H), 7.56–7.67 (m, 2H), 7.80 (s, 1H), 7.88–7.94 (m, 2H),  $^{13}\text{C NMR}$  (125.62 MHz,  $\text{CDCl}_3$ , 30 °C):  $\delta = 26.5, 32.5, 34.2, 43.4, 53.1, 69.3, 123.4, 124.0, 126.7, 126.9, 129.7, 129.8, 130.5, 132.2, 132.8, 134.8, 169.8$  ppm,  $\text{C}_{17}\text{H}_{17}\text{N}_5\text{O}$  (307.36): calcd. C, 66.43; H, 5.58; N, 22.79; found C, 66.48; H, 5.56; N, 22.82. HRMS-ESI  $[\text{M}+\text{H}]^+ m/z$  calcd for  $\text{C}_{17}\text{H}_{17}\text{N}_5\text{O}$ : 308,15059, found 308,15078.

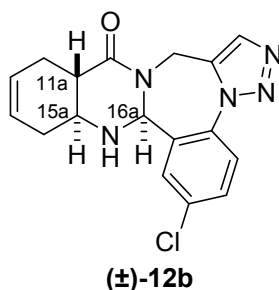

**(*r*-11a,*t*-15a,*t*-16a)-2-Chloro-11a,12,15,15a,16,16a-**

**hexahydrobenzo[5,6][1,2,3]triazolo[5',1':3,4][1,4]diazepino[7,1-*b*]quinazolin-11(9*H*)-one (±)-12b:**

Light brown crystals (68% yield), m.p. 201–205 °C,  $^1\text{H-NMR}$  (500.20 MHz,  $\text{CDCl}_3$ , 30 °C):  $\delta = 1.97$ –2.13 (m, 2H), 2.13–2.23 (m, 1H), 2.67–2.75 (m, 1H), 3.02–3.10 (m, 1H), 3.70 (d, 1H,  $J = 15.2$  Hz), 5.19 (s, 1H),

5.62–5.79 (m, 3H), 7.58–7.62 (m, 1H), 7.79 (s, 1H), 7.85 (d, 1H,  $J = 8.5$  Hz), 7.94 (d, 1H,  $J = 2.2$  Hz),  $^{13}\text{C}$  NMR (125.62 MHz,  $\text{CDCl}_3$ , 30 °C):  $\delta = 23.4, 26.4, 32.4, 34.3, 42.2, 43.3, 53.0, 69.0, 123.9, 124.6, 126.7, 126.6, 127.6, 129.8, 130.6, 131.7, 132.3, 132.9, 133.3, 135.8, 169.7$  ppm,  $\text{C}_{17}\text{H}_{16}\text{ClN}_5\text{O}$  (341.79): calcd. C, 59.74; H, 4.72; Cl, 10.37; N, 20.49; found C, 59.76; H, 4.78; Cl, 10.33; N, 20.46. HRMS-ESI  $[\text{M}+\text{H}]^+m/z$  calcd for  $\text{C}_{17}\text{H}_{16}\text{ClN}_5\text{O}$ : 342,11161, found 342,11193.

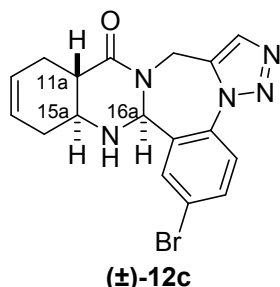

**(*r*-11a,*t*-15a,*t*-16a)-2-Bromo-11a,12,15,15a,16,16a-**

**hexahydrobenzo[5,6][1,2,3]triazolo[5',1':3,4][1,4]diazepino[7,1-*b*]quinazolin-11(9*H*)-one (±)-12c:** Light brown crystals (66% yield), m.p. 218–223 °C,  $^1\text{H}$ -NMR (500.20 MHz,  $\text{CDCl}_3$ , 30 °C):  $\delta = 2.01\text{--}2.24$  (m, 4H), 2.66–2.74 (m, 1H), 3.02–3.10 (m, 1H), 3.69 (d, 1H,  $J = 15.3$  Hz), 5.18 (s, 1H), 5.63–5.79 (m, 3H), 7.74–7.80 (m, 3H), 8.10 (s, 1H),  $^{13}\text{C}$  NMR (125.62 MHz,  $\text{CDCl}_3$ , 30 °C):  $\delta = 23.5, 26.4, 32.3, 34.3, 42.1, 43.2, 52.9, 68.9, 123.7, 124.0, 124.8, 126.6, 130.6, 131.8, 132.2, 133.0, 133.6, 133.7, 169.8$  ppm,  $\text{C}_{17}\text{H}_{16}\text{BrN}_5\text{O}$  (386.25): calcd. C, 52.86; H, 4.18; N, 18.13; found C, 52.78; H, 4.16; N, 18.16. HRMS-ESI  $[\text{M}+\text{H}]^+m/z$  calcd for  $\text{C}_{17}\text{H}_{16}\text{BrN}_5\text{O}$ : 386,06110, found 386,06190.

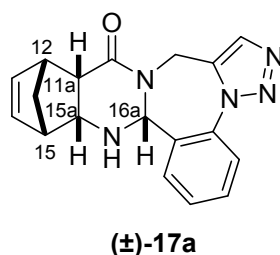

**(*r*-11a,*t*-12,*t*-15,*c*-15a,*c*-16a)-11a,12,15,15a,16,16a-Hexahydro-12,15-**

**methanobenzo[5,6][1,2,3]triazolo[5',1':3,4][1,4]diazepino[7,1-*b*]quinazolin-11(9*H*)-one (±)-17a:** Light brown crystals (70% yield), m.p. 213–216 °C, ( $R_f = 0.40$ , EtOAc),  $^1\text{H}$ -NMR (500.20 MHz,  $\text{CDCl}_3$ , 30 °C):  $\delta = 1.25$  (t, 2H,  $J = 7.1$  Hz), 1.48 (d, 1H,  $J = 9.1$  Hz), 1.60 (s, 1H), 1.63 (d, 1H,  $J = 9.1$  Hz), 2.63–2.68 (m, 1H), 3.19 (s, 1H), 3.48 (s, 1H), 3.89–3.95 (m, 1H), 5.26 (s, 1H), 6.17 (s, 1H), 6.45 (s, 1H), 7.53–7.64 (m, 2H), 7.72 (d, 1H,  $J = 7.9$  Hz), 7.74 (s, 1H), 7.83 (d, 1H,  $J = 7.9$  Hz),  $^{13}\text{C}$  NMR (125.62 MHz,  $\text{CDCl}_3$ , 30 °C):  $\delta = 33.3, 44.4, 46.4, 46.6, 47.6, 58.3, 124.2, 128.7, 129.5, 130.5, 131.4, 132.0, 133.1, 133.2, 134.5, 140.4, 171.0$  ppm,  $\text{C}_{18}\text{H}_{17}\text{N}_5\text{O}$  (319.37): calcd. C, 67.70; H, 5.37; N, 21.93; found C, 67.67; H, 5.41; N, 21.96. HRMS-ESI  $[\text{M}+\text{H}]^+m/z$  calcd for  $\text{C}_{18}\text{H}_{17}\text{N}_5\text{O}$ : 320,15059, found 320,15132.

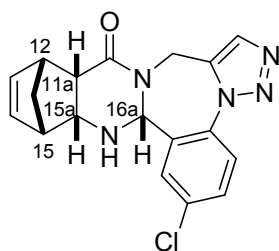

(±)-17b

**(*r*-11a,*t*-12,*t*-15,*c*-15a,*c*-16a)-2-Chloro-11a,12,15,15a,16,16a-hexahydro-12,15-methanobenzo[5,6][1,2,3]triazolo[5',1':3,4][1,4]diazepino[7,1-*b*]quinazolin-11(9*H*)-one (±)-17b:**

Light brown crystals (69% yield), m.p. 250–253 °C, ( $R_f$  = 0.40, EtOAc),  $^1\text{H-NMR}$  (500.20 MHz,  $\text{CDCl}_3$ , 30 °C):  $\delta$  = 1.48 (d, 1H,  $J$  = 9.0 Hz), 1.65 (d, 1H,  $J$  = 9.0 Hz), 2.63–2.68 (m, 1H), 3.21 (s, 1H), 3.48 (s, 1H), 3.91 (s, 2H), 5.22 (s, 1H), 5.59 (s, 1H), 6.22 (s, 1H), 6.47 (s, 1H), 7.56–7.60 (m, 1H), 7.72–7.80 (m, 3H),  $^{13}\text{C NMR}$  (125.62 MHz,  $\text{CDCl}_3$ , 30 °C):  $\delta$  = 33.1, 44.5, 46.4, 46.6, 47.6, 58.3, 125.4, 128.9, 130.3, 130.6, 131.6, 132.9, 133.1, 133.1, 135.6, 140.5, 170.9 ppm,  $\text{C}_{18}\text{H}_{16}\text{ClN}_5\text{O}$  (353.81): calcd. C, 61.10; H, 4.56; Cl, 10.02; N, 19.79; found C, 61.07; H, 4.55; Cl, 10.10; N, 19.81. HRMS-ESI  $[\text{M}+\text{H}]^+m/z$  calcd for  $\text{C}_{18}\text{H}_{16}\text{ClN}_5\text{O}$ : 354,11161, found 354,11197.

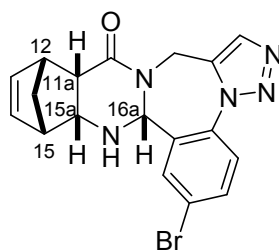

(±)-17c

**(*r*-11a,*t*-12,*t*-15,*c*-15a,*c*-16a)-2-Bromo-11a,12,15,15a,16,16a-hexahydro-12,15-methanobenzo[5,6][1,2,3]triazolo[5',1':3,4][1,4]diazepino[7,1-*b*]quinazolin-11(9*H*)-one (±)-17c:**

Light brown crystals (62% yield), m.p. 258–261 °C, ( $R_f$  = 0.40, EtOAc),  $^1\text{H-NMR}$  (500.20 MHz,  $\text{CDCl}_3$ , 30 °C):  $\delta$  = 1.45 (d, 1H,  $J$  = 9.1 Hz), 1.65 (d, 1H,  $J$  = 9.1 Hz), 2.63–2.68 (m, 1H), 3.21 (s, 1H), 3.48 (s, 1H), 3.90 (s, 2H), 5.22 (s, 1H), 5.58 (s, 1H), 6.22 (s, 1H), 6.46 (s, 1H), 7.68–7.76 (m, 3H), 7.90 (s, 1H),  $^{13}\text{C NMR}$  (125 MHz,  $\text{CDCl}_3$ , 30 °C):  $\delta$  = 29.6, 33.8, 41.2, 44.3, 44.3, 45.7, 47.9, 57.0, 123.4, 125.7, 130.7, 131.7, 131.8, 133.2, 133.8, 135.2, 138.6, 170.9 ppm,  $\text{C}_{18}\text{H}_{16}\text{BrN}_5\text{O}$  (398.26): calcd. C, 54.28; H, 4.05; N, 17.59; found C, 54.31; H, 3.98; N, 17.58. HRMS-ESI  $[\text{M}+\text{H}]^+m/z$  calcd for  $\text{C}_{18}\text{H}_{16}\text{BrN}_5\text{O}$ : 398,0611, found 398,06063.

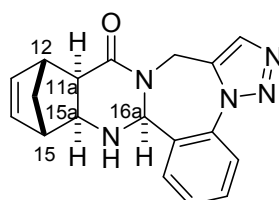

(±)-18a

**(*r*-11a,*c*-12,*c*-15,*c*-15a,*c*-16a)-11a,12,15,15a,16,16a-Hexahydro-12,15-methanobenzo[5,6][1,2,3]triazolo[5',1':3,4][1,4]diazepino[7,1-*b*]-quinazolin-11(9*H*)-one (±)-18a:**

Light brown crystals (68% yield), m.p. 217–220 °C, ( $R_f = 0.40$ , EtOAc),  $^1\text{H-NMR}$  (500.20 MHz,  $\text{CDCl}_3$ , 30 °C):  $\delta = 1.20$  (t, 2H,  $J = 6.9$  Hz), 1.50 (s, 2H), 2.13 (d, 1H,  $J = 7.7$  Hz), 2.86 (s, 1H), 3.24 (d, 1H,  $J = 7.7$  Hz), 3.45–3.51 (m, 2H), 4.00 (s, 1H), 5.29 (s, 1H), 6.12 (s, 1H), 6.30 (m, 1H), 7.58 (t, 1H,  $J = 7.0$  Hz), 7.64 (t, 1H,  $J = 7.0$  Hz), 7.77 (s, 2H), 7.89 (d, 1H,  $J = 7.9$  Hz),  $^{13}\text{C NMR}$  (125.62 MHz,  $\text{CDCl}_3$ , 30 °C):  $\delta = 23.5$ , 34.0, 42.2, 44.2, 44.3, 45.6, 47.6, 124.4, 128.9, 129.6, 130.7, 131.6, 134.7, 135.3, 138.6, 171.1 ppm,  $\text{C}_{18}\text{H}_{17}\text{N}_5\text{O}$  (319.37): calcd. C, 67.70; H, 5.37; N, 21.93; found C, 67.66; H, 5.35; N, 21.96. HRMS-ESI  $[\text{M}+\text{H}]^+m/z$  calcd for  $\text{C}_{18}\text{H}_{17}\text{N}_5\text{O}$ : 320,15059, found 320,15121.

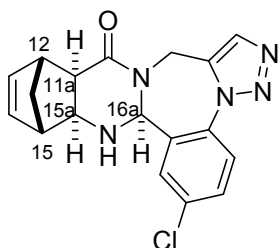

(±)-18b

**(*r*-11a,*c*-12,*c*-15,*c*-15a,*c*-16a)-2-Chloro-11a,12,15,15a,16,16a-hexahydro-12,15-methanobenzo[5,6][1,2,3]triazolo-[5',1':3,4][1,4]-diazepino[7,1-*b*]quinazolin-11(9*H*)-one (±)-18b :** Light brown crystals (69% yield), m.p. 252–246 °C,  $^1\text{H-NMR}$  (500.20 MHz,  $\text{CDCl}_3$ , 30 °C):  $\delta = 1.10$ –1.68 (m, 2H), 2.13 (d, 1H,  $J = 6.2$  Hz), 2.90 (s, 1H), 3.23 (d, 1H,  $J = 6.2$  Hz), 3.50 (s, 1H), 5.23 (s, 1H), 6.11–6.14 (m, 1H), 6.28–6.31 (m, 1H), 7.60 (d, 1H,  $J = 7.9$  Hz), 7.75 (s, 1H), 7.79 (s, 1H), 7.83 (d, 1H,  $J = 8.3$  Hz)  $^{13}\text{C NMR}$  (125.62 MHz,  $\text{CDCl}_3$ , 30 °C):  $\delta = 33.9$ , 44.3, 44.3, 45.7, 48.0, 57.0, 125.6, 129.0, 130.6, 130.8, 131.7, 133.3, 135.3, 135.6, 138.7, 170.9 ppm,  $\text{C}_{18}\text{H}_{16}\text{ClN}_5\text{O}$  (353.81): calcd. C, 61.10; H, 4.56; Cl, 10.02; N, 19.79; found C, 61.06; H, 4.60; Cl, 10.04; N, 19.81. HRMS-ESI  $[\text{M}+\text{H}]^+m/z$  calcd for  $\text{C}_{18}\text{H}_{16}\text{ClN}_5\text{O}$ : 354,11161, found 354,11197.

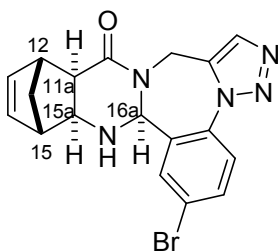

(±)-18c

**(*r*-11a,*c*-12,*c*-15,*c*-15a,*c*-16a)-2-Bromo-11a,12,15,15a,16,16a-hexahydro-12,15-methanobenzo[5,6][1,2,3]triazolo[5',1':3,4][1,4]-diazepino[7,1-*b*]quinazolin-11(9*H*)-one (±)-18c:** Light brown crystals (64% yield), m.p. 260–264 °C,  $^1\text{H-NMR}$  (500.20 MHz,  $\text{CDCl}_3$ , 30 °C):  $\delta = 1.52$  (s, 2H), 2.12 (d, 1H,  $J = 7.6$  Hz), 2.89 (s, 1H), 3.23 (d, 1H,  $J = 7.6$  Hz), 3.49 (s, 1H), 5.23 (s, 1H), 6.11–6.14 (m, 1H), 6.28–6.31 (m, 1H), 7.73–7.78 (m, 3H), 7.94 (s, 1H)  $^{13}\text{C NMR}$  (125.62 MHz,  $\text{CDCl}_3$ , 30 °C):  $\delta = 29.6$ , 33.8, 41.2, 44.3, 44.3, 45.7, 47.9, 57.0, 123.4, 125.7, 130.7, 131.7, 131.8, 133.2, 133.7, 133.8, 135.2, 138.6, 170.9 ppm,  $\text{C}_{18}\text{H}_{16}\text{BrN}_5\text{O}$  (398.26): calcd. C, 54.28; H, 4.05; N, 17.59; found C, 54.26; H, 4.03; N, 17.61. HRMS-ESI  $[\text{M}+\text{H}]^+m/z$  calcd for  $\text{C}_{18}\text{H}_{16}\text{BrN}_5\text{O}$ : 398,06110, found 398,06051.

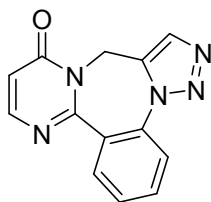

19

**9H-Benzo[*f*]pyrimido[1,2-*d*][1,2,3]triazolo[1,5-*a*][1,4]diazepin-11-one 19:** Light brown crystals (66% yield), m.p. 287–291 °C, ( $R_f$  = 0.50, EtOAc),  $^1\text{H-NMR}$  (500.20 MHz,  $\text{CDCl}_3$ , 30 °C):  $\delta$  = 4.20 (d, 1H,  $J$  = 15.0 Hz), 6.50 (d, 1H,  $J$  = 6.5 Hz), 6.60 (d, 1H,  $J$  = 15.0 Hz), 7.67 (t, 1H,  $J$  = 8.0 Hz), 7.82 (d, 1H,  $J$  = 8.0 Hz), 7.89 (s, 1H), 7.99 (d, 1H,  $J$  = 6.5 Hz), 8.11 (d, 1H,  $J$  = 8.0 Hz), 8.22 (d, 1H,  $J$  = 8.0 Hz),  $^{13}\text{C NMR}$  (125.62 MHz,  $\text{CDCl}_3$ , 30 °C):  $\delta$  = 33.5, 113.7, 123.3, 125.7, 129.3, 132.1, 132.6, 133.4, 133.6, 133.8, 152.9, 157.0, 160.0 ppm,  $\text{C}_{13}\text{H}_9\text{N}_5\text{O}$  (251.25): calcd. C, 62.15; H, 3.61; N, 27.87; found C, 62.07; H, 3.41; N, 27.93. HRMS-ESI  $[\text{M}+\text{H}]^+m/z$  calcd for  $\text{C}_{13}\text{H}_9\text{N}_5\text{O}$ : 252,08799, found 252,08838.

#### Representative Data for the enantiomerically pure compounds (+)-17a and (–)-17a

$^1\text{H}$  and  $^{13}\text{C}$  NMR data of the enantiomeric compounds were identical with those of the racemic compounds

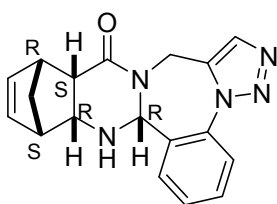

(+)-17a

**(11a*S*,12*R*,15*S*,15a*R*,16a*R*)-11a,12,15,15a,16,16a-hexahydro-12,15-methanobenzo[5,6][1,2,3]triazolo[5',1':3,4][1,4]diazepino[7,1-*b*]quinazolin-11(9*H*)-one** (+)-17a:  
Light brown crystals (70% yield), m.p. 213–216 °C, ( $R_f$  = 0.40),  $[\alpha]_D^{25} = +61$  ( $c$  = 0.5, EtOH)

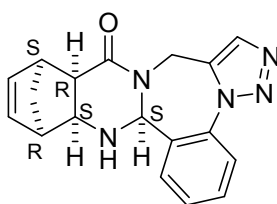

(–)-17a

**(11a*R*,12*S*,15*R*,15a*S*,16a*S*)-11a,12,15,15a,16,16a-hexahydro-12,15-methanobenzo[5,6][1,2,3]triazolo[5',1':3,4][1,4]diazepino[7,1-*b*]quinazolin-11(9*H*)-one** (–)-17a:  
Light brown crystals (70% yield), m.p. 213–216 °C, ( $R_f$  = 0.40),  $[\alpha]_D^{25} = -63$  ( $c$  = 0.5, EtOH)



### **Determination of antiproliferative activities**

The effects of the tested compounds on cell growth were determined using a standard MTT (3-(4,5-dimethylthiazol-2-yl)-2,5-diphenyltetrazolium bromide) assay on a selection of human gynaecological cancer cell lines of epidemiological significance: MCF-7 (ER+, PR+, and HER2- breast cancer), MDA-MB-231 (ER-, PR- and HER2- breast cancer), HeLa (human papilloma virus [HPV] 18 positive cervical cancer), SiHa (HPV 16 positive cervical cancer) and A2780 (ER- ovarian cancer)<sup>8</sup>. The cell lines – apart from SiHa – were obtained from ECACC (European Collection of Cell Cultures, Salisbury, UK). SiHa was obtained from ATCC (American Tissue Culture Collection, Manassas, VA, USA). Cells were propagated in minimal essential medium supplemented with 10% fetal bovine serum, 1% non-essential amino acids and a 1% penicillin–streptomycin mixture at 37 °C in a humidified atmosphere containing 5% CO<sub>2</sub>. All media and culture supplements were purchased from Lonza Group Ltd. (Basel, Switzerland).

Cells were seeded into 96-well microtiter plates (at a cell density of 5x10<sup>3</sup>/well) and incubated with the tested compounds at 10 µM and 30 µM under cell-culture conditions for 72 h. Subsequently, the MTT solution (5 mg/mL) was added to each well, which were further incubated for 4 h. The medium was removed and the precipitated formazan crystals were dissolved in 0.1 mL DMSO during a 1 h shaking at 37 °C.<sup>8</sup> The absorbance in the wells was measured at 545 nm using a microplate reader. Untreated cells served as controls during the measurements. Results presented in the paper have been obtained from two independent experiments with five wells per each condition. Cisplatin (Ebewe Pharmaceuticals, Unterach, Austria) was used as a reference agent. Calculations were performed using GraphPad Prism 5.01 software (GraphPad Software Inc., San Diego, CA, USA).

## 2. Refences

- 1 F. Fülöp, M. Palkó, E. Forró, M. Dervarics, T.A. Martinek, R. Sillanpää, *Eur. J. Org. Chem.* 2005, **15**, 3214–3220.
- 2 M. Palkó, M. El Haimer, Z. Kormányos, F. Fülöp, *Molecules* 2019, **24**, 772.
- 3 K. G. Guggenheim, H. Toru, M. J. Kurth, *Org. Lett.* 2012, **14**, 3732-3735.
- 4 M. V. Madhubabu, R. Shankar, G. R. Reddy, T. S. Rao, M. V. B. Rao, R. Akula, *Tetrahedron Lett.* 2016, **46**, 5033-5037.
- 5 Rigaku Oxford Diffraction, CrysAlisPro, Agilent Technologies inc., 2018, Yarnton, Oxfordshire, England.
- 6 G. M. Sheldrick, *Acta Cryst.* 2015, **71**, 3-8.
- 7 C. B. Hübschle, G. M. Sheldrick, B. Dittrich, *J. Appl. Cryst.* 2011, **44**, 1281-1284.
- 8 D. Ozsvár, V. Nagy, I. Zupkó, Z. Szakonyi, *Int. J. Mol. Sci.* 2019, **21**, e184.

### 3. Copies of $^1\text{H}$ - and $^{13}\text{C}$ NMR spectra of ( $\pm$ )-3 - 19

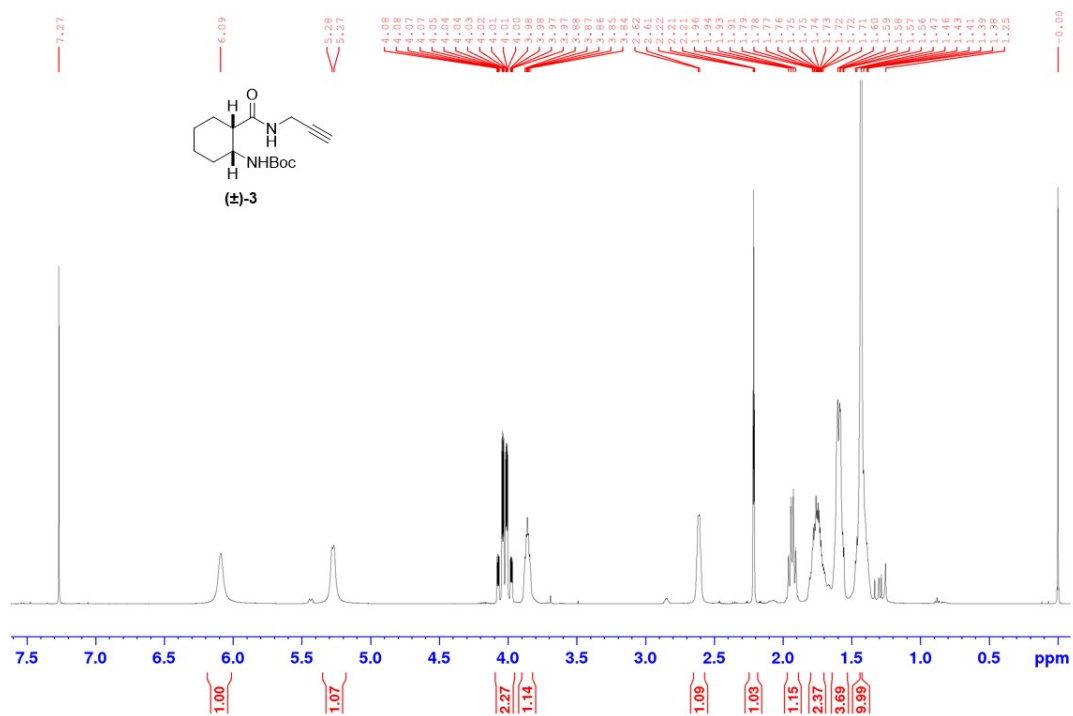

$^1\text{H}$  NMR Spectrum of *tert*-butyl (*cis*-2-(prop-2-yn-1-ylcarbamoyl)cyclohexyl)carbamate ( $\pm$ )-3 ( $\text{CDCl}_3$ )

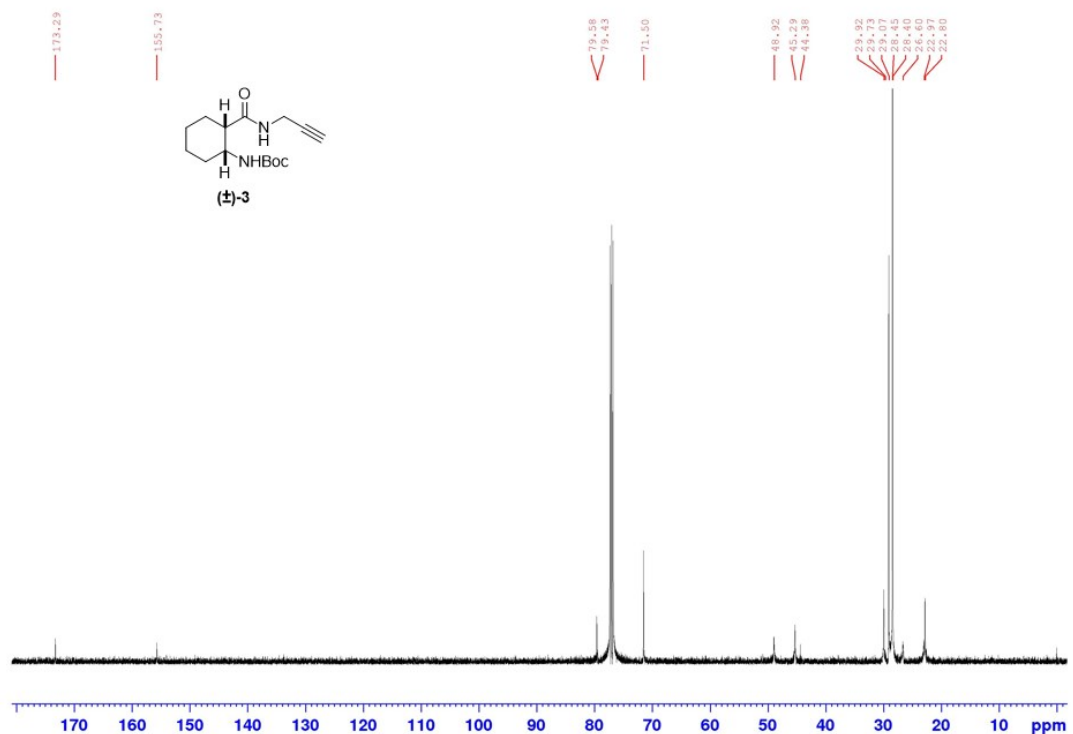

$^{13}\text{C}$  NMR Spectrum of *tert*-butyl (*cis*-2-(prop-2-yn-1-ylcarbamoyl)cyclohexyl)carbamate ( $\pm$ )-3 ( $\text{CDCl}_3$ )

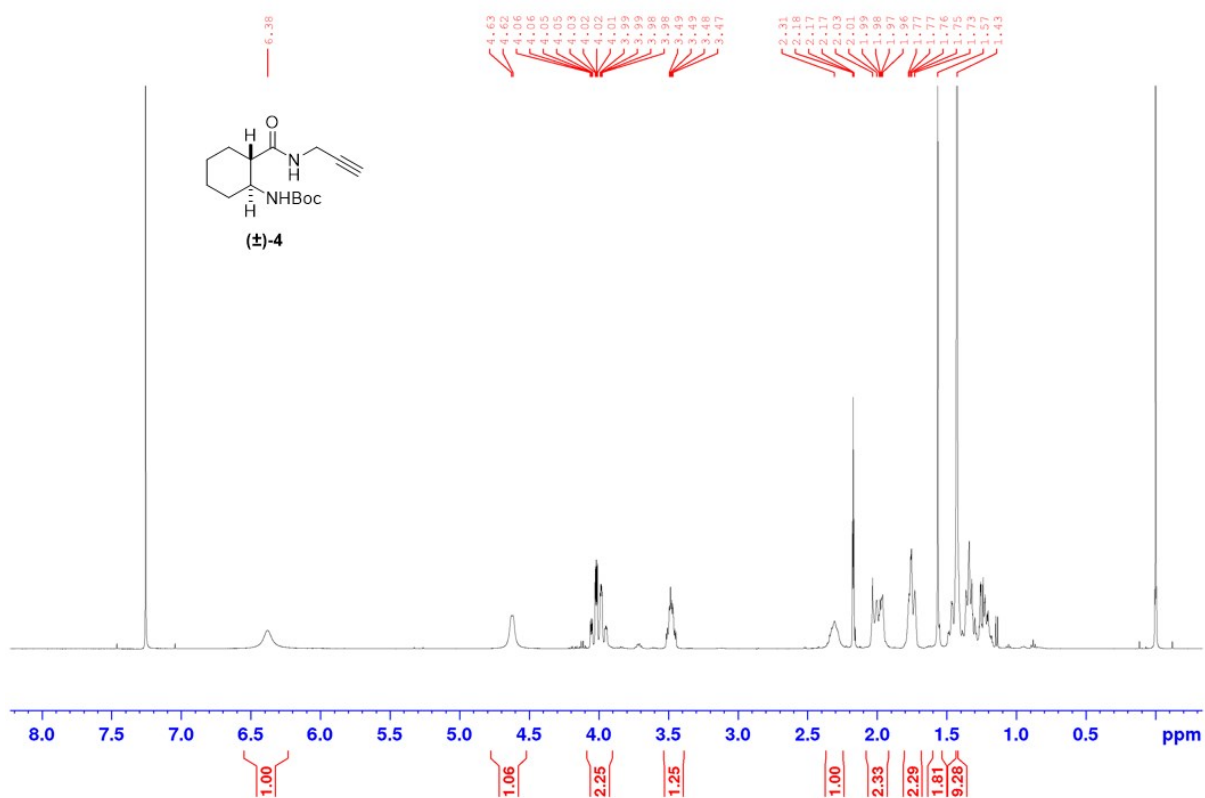

<sup>1</sup>H NMR Spectrum of *tert*-butyl (*trans*-2-(prop-2-yn-1-ylcarbamoyl)cyclohexyl)carbamate (±)-4 (CDCl<sub>3</sub>)

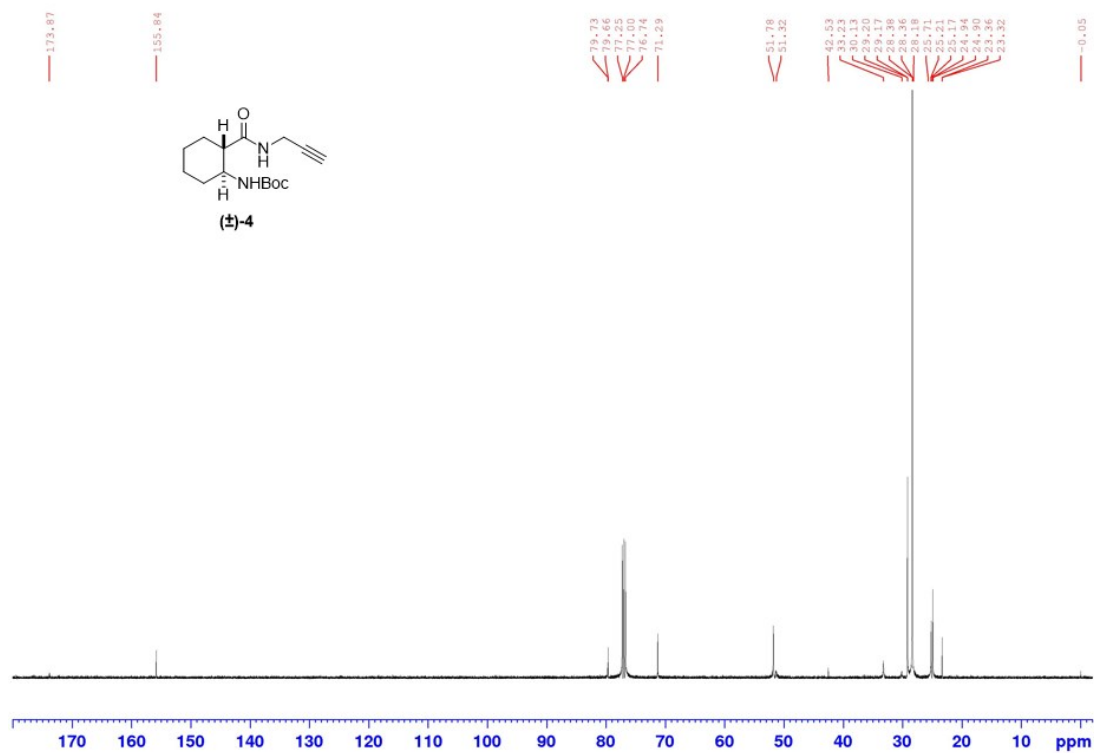

<sup>13</sup>C NMR Spectrum of *tert*-butyl (*trans*-2-(prop-2-yn-1-ylcarbamoyl)cyclohexyl)carbamate (±)-4 (CDCl<sub>3</sub>)

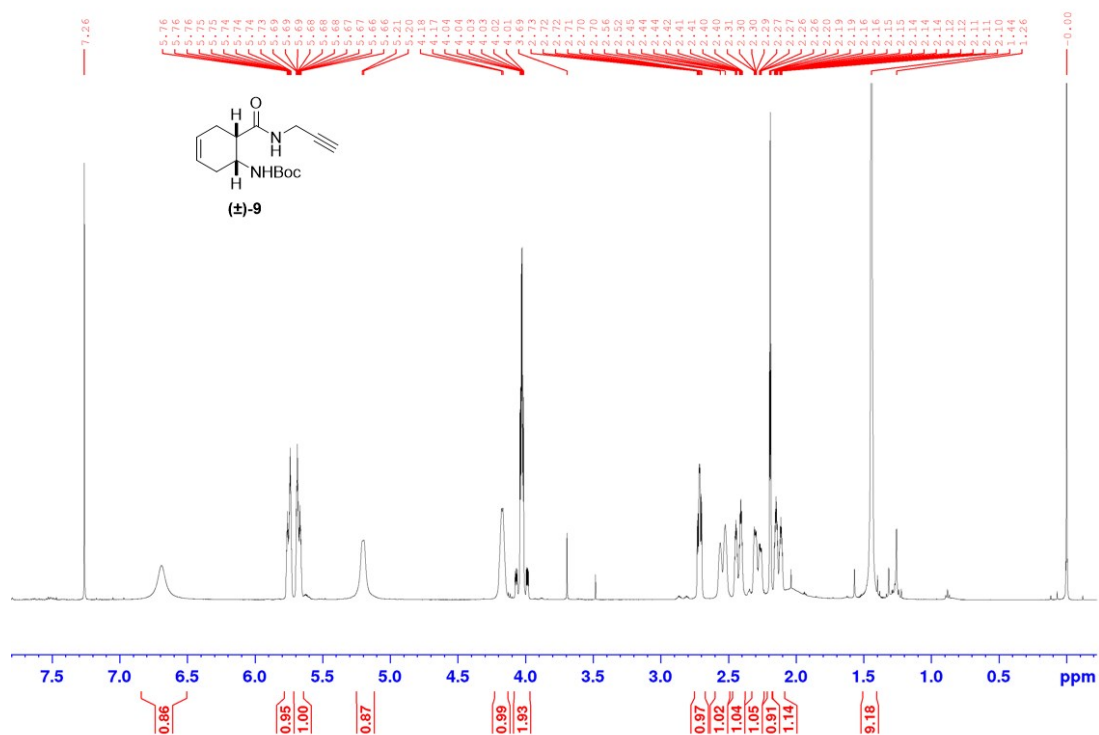

<sup>1</sup>H NMR Spectrum of *tert*-butyl (*cis*-6-(prop-2-yn-1-ylcarbamoyl)cyclohex-3-en-1-yl)carbamate (±)-9 (CDCl<sub>3</sub>)

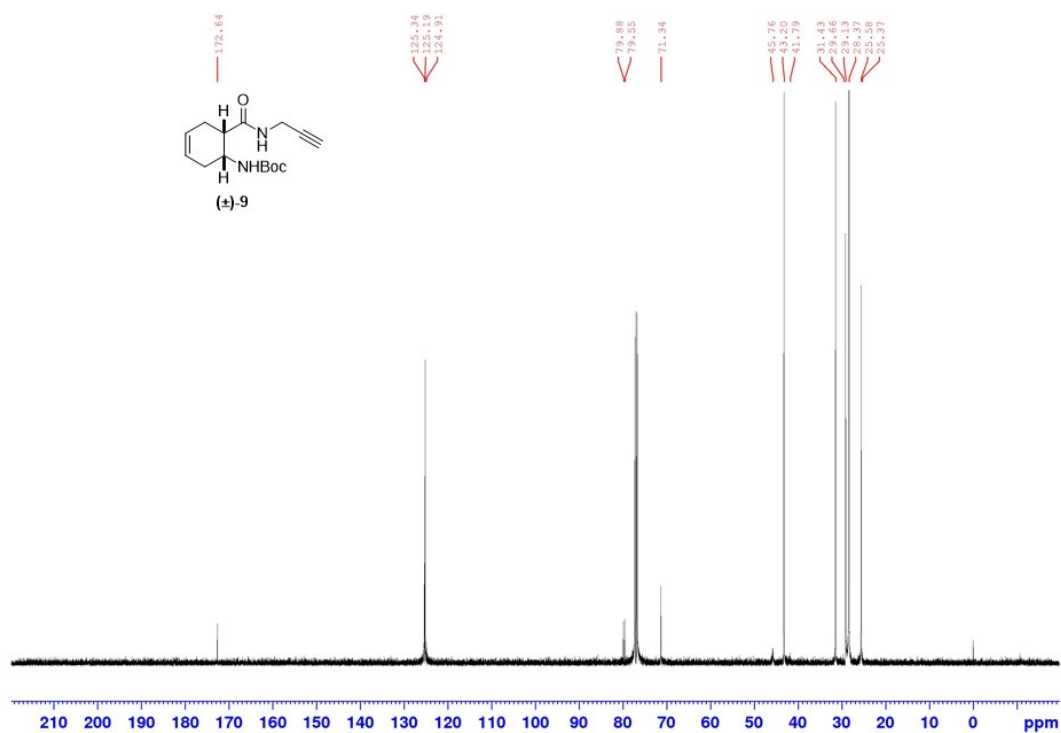

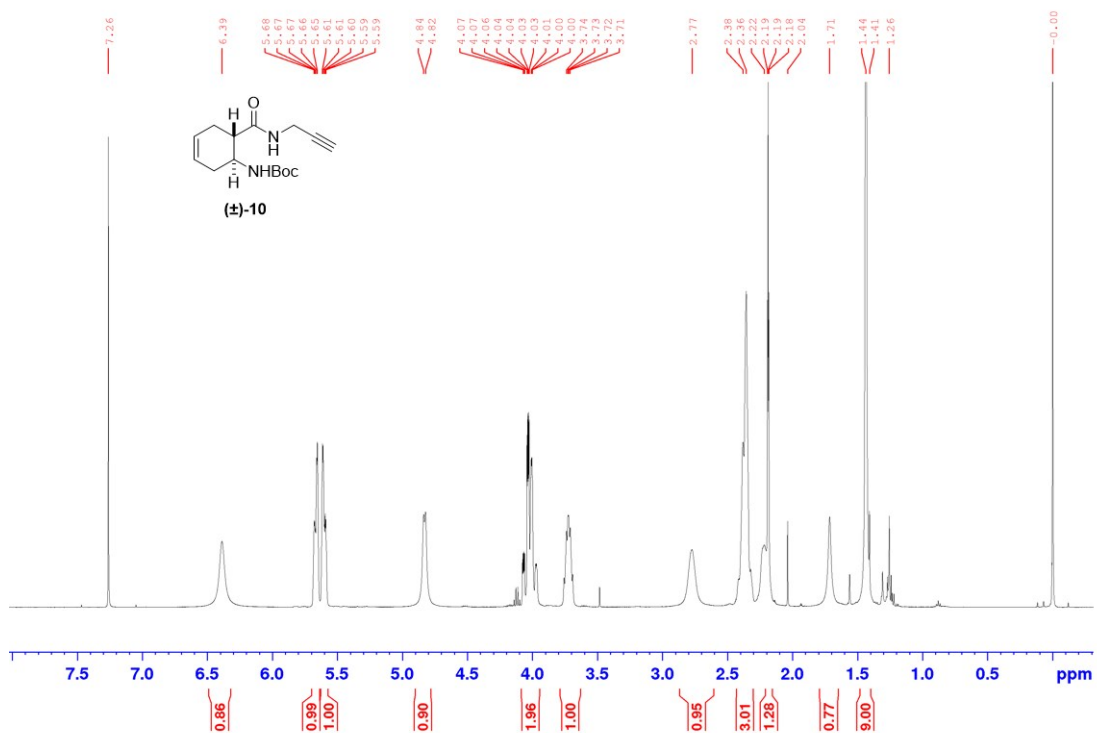

**<sup>1</sup>H NMR Spectrum of *tert*-butyl (*trans*-6-(prop-2-yn-1-ylcarbamoyl)cyclohex-3-en-1-yl)carbamate (±)-**10** (CDCl<sub>3</sub>)**

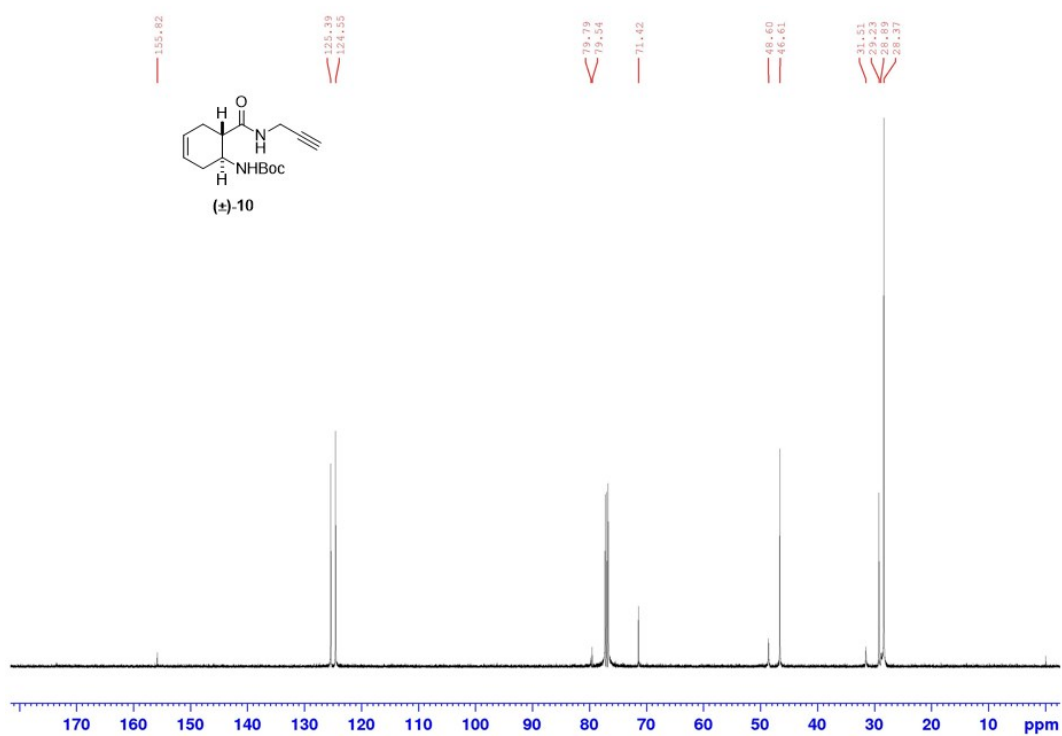

**<sup>13</sup>C NMR Spectrum of *tert*-butyl (*trans*-6-(prop-2-yn-1-ylcarbamoyl)cyclohex-3-en-1-yl)carbamate (±)-**10** (CDCl<sub>3</sub>)**

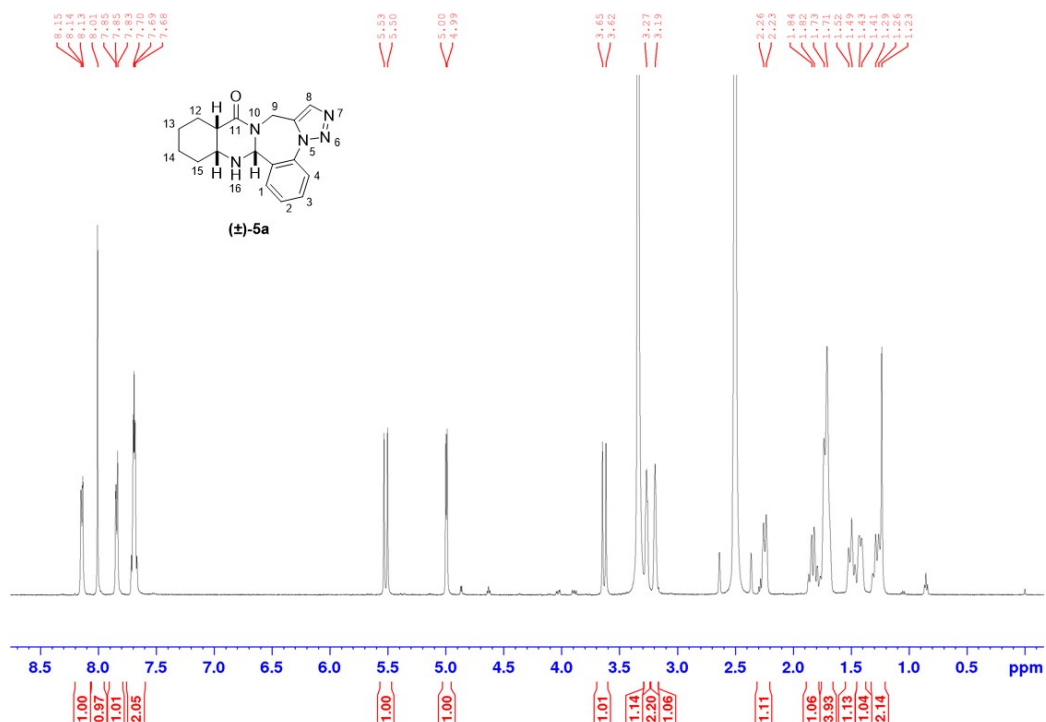

<sup>1</sup>H NMR Spectrum of (*r*-11a,*c*-15a,*c*-16a)-11a,12,13,14,15,15a,16,16a-octahydrobenzo[5,6][1,2,3]triazolo[5',1':3,4][1,4]diazepino[7,1-*b*]quinazolin-11(9*H*)-one (±)-5a: (DMSO)

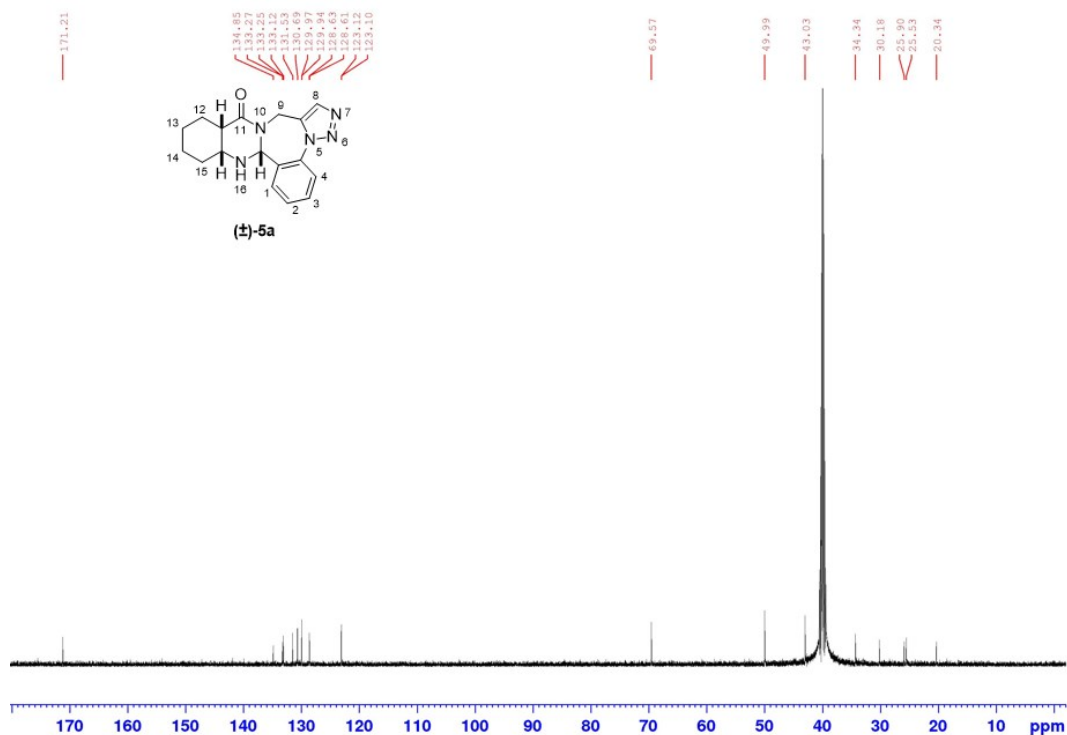

<sup>13</sup>C NMR Spectrum of (*r*-11a,*c*-15a,*c*-16a)-11a,12,13,14,15,15a,16,16a-octahydrobenzo[5,6][1,2,3]triazolo[5',1':3,4][1,4]diazepino[7,1-*b*]quinazolin-11(9*H*)-one (±)-5a: (DMSO)

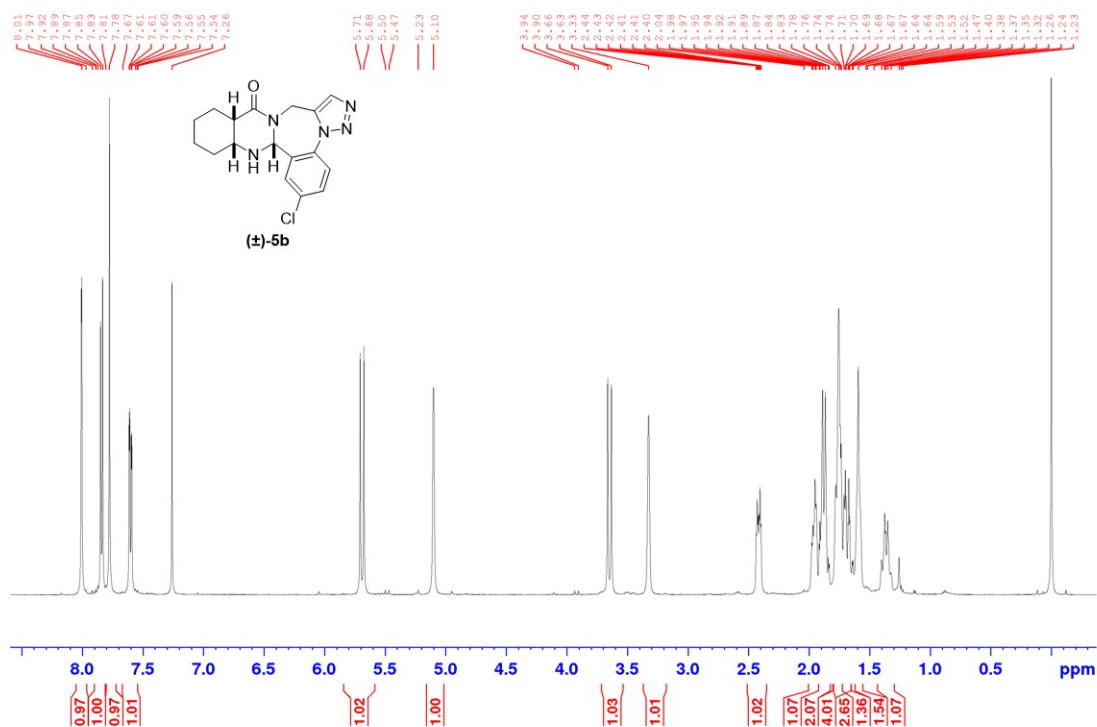

<sup>1</sup>H NMR Spectrum of (*r*-11a,*c*-15a,*c*-16a)-2-chloro-11a,12,13,14,15,15a,16,16a-octahydrobenzo[5,6][1,2,3]triazolo[5',1':3,4][1,4]diazepino[7,1-*b*]quinazolin-11(9*H*)-one (**±**)-**5b** (CDCl<sub>3</sub>)

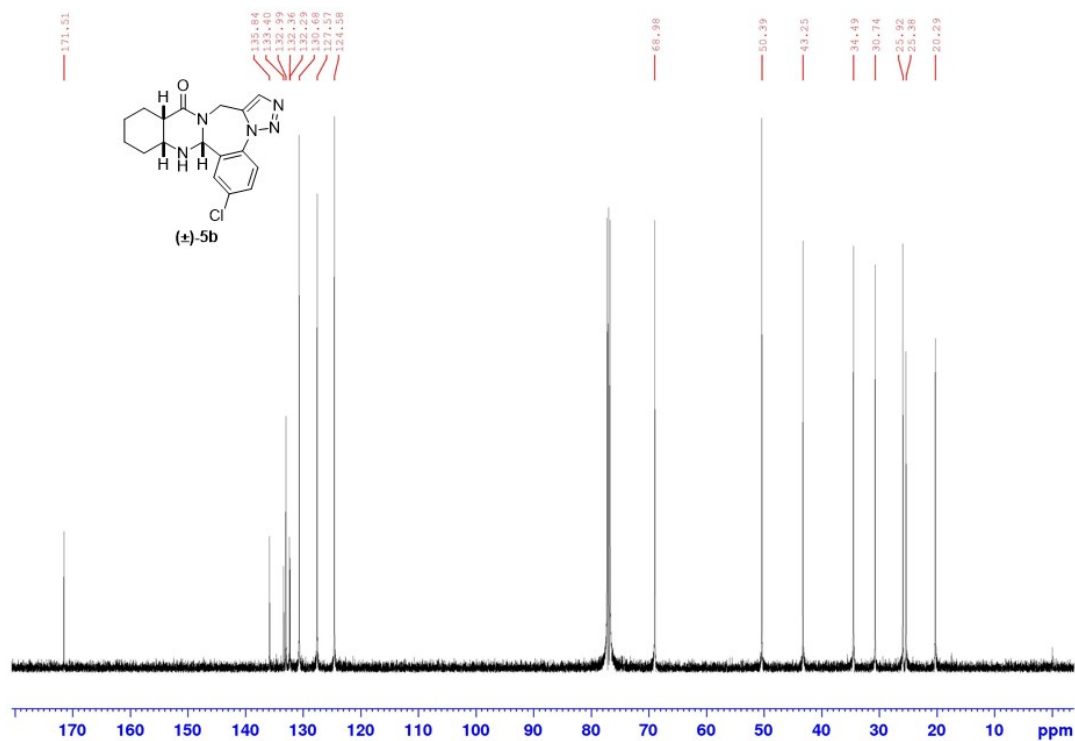

<sup>13</sup>C NMR Spectrum of (*r*-11a,*c*-15a,*c*-16a)-2-chloro-11a,12,13,14,15,15a,16,16a-octahydrobenzo[5,6][1,2,3]triazolo[5',1':3,4][1,4]diazepino[7,1-*b*]quinazolin-11(9*H*)-one (**±**)-**5b** (CDCl<sub>3</sub>)



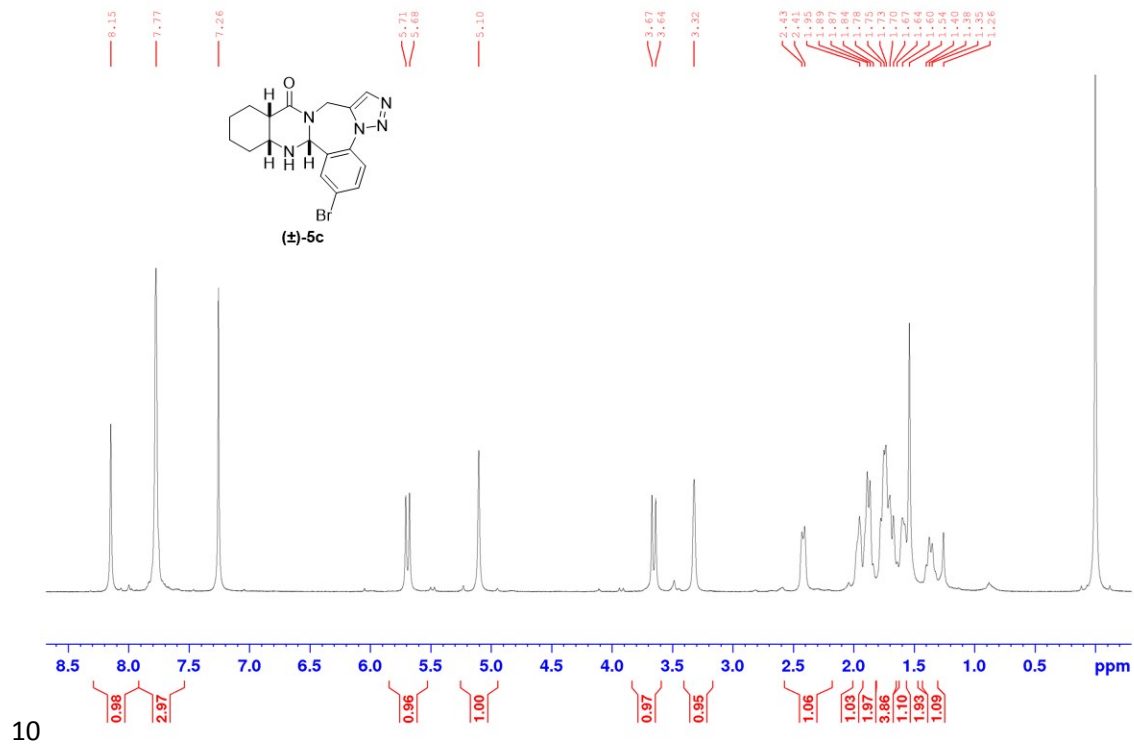

10  
<sup>1</sup>H NMR Spectrum of (*r*-11a,*c*-15a,*c*-16a)-2-bromo-11a,12,13,14,15,15a,16,16a-octahydrobenzo[5,6][1,2,3]triazolo[5',1':3,4][1,4]diazepino[7,1-*b*]quinazolin-11(9*H*)-one (±)-5c (CDCl<sub>3</sub>)

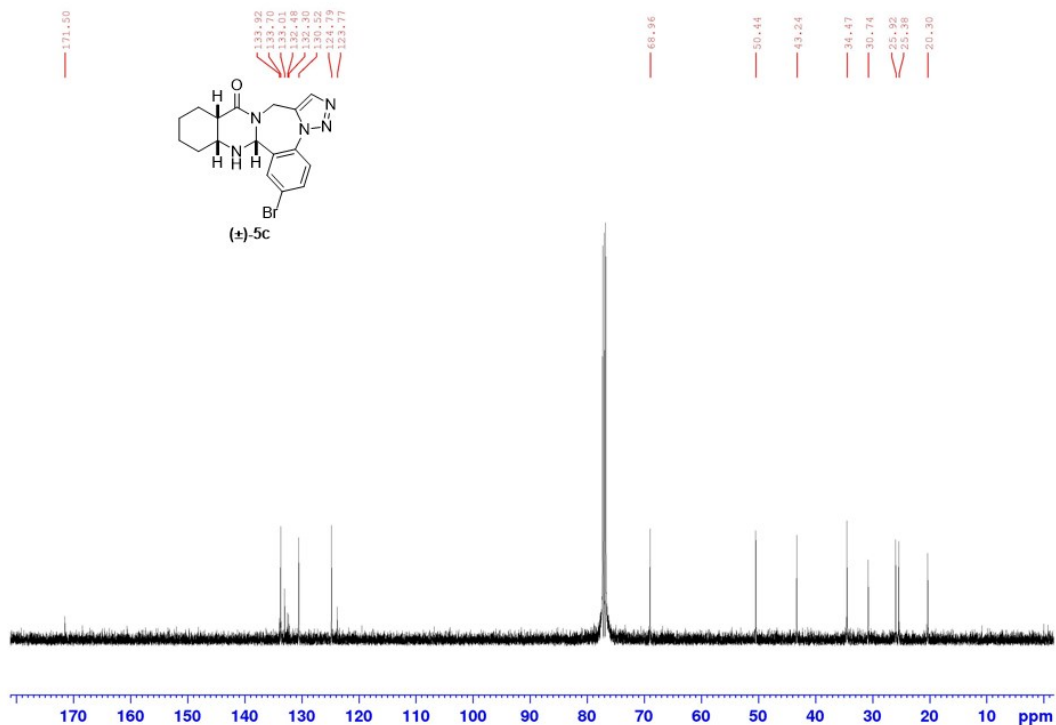

<sup>13</sup>C NMR Spectrum of (*r*-11a,*c*-15a,*c*-16a)-2-bromo-11a,12,13,14,15,15a,16,16a-octahydrobenzo[5,6][1,2,3]triazolo[5',1':3,4][1,4]diazepino[7,1-*b*]quinazolin-11(9*H*)-one (±)-5c (CDCl<sub>3</sub>)

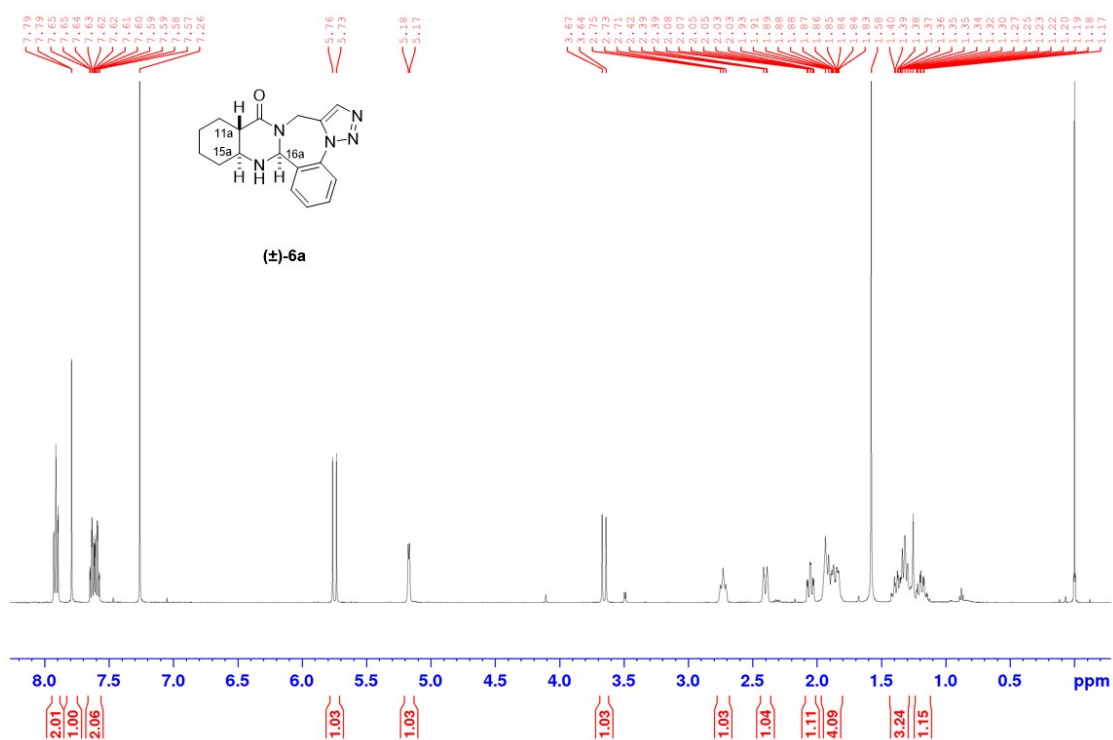

$^1\text{H}$  NMR Spectrum of (*r*-11a,*t*-15a,*t*-16a)-11a,12,13,14,15,15a,16,16a-octahydrobenzo[5,6][1,2,3]triazolo[5',1':3,4][1,4]diazepino[7,1-*b*]quinazolin-11(9*H*)-one ( $\pm$ )-6a ( $\text{CDCl}_3$ )

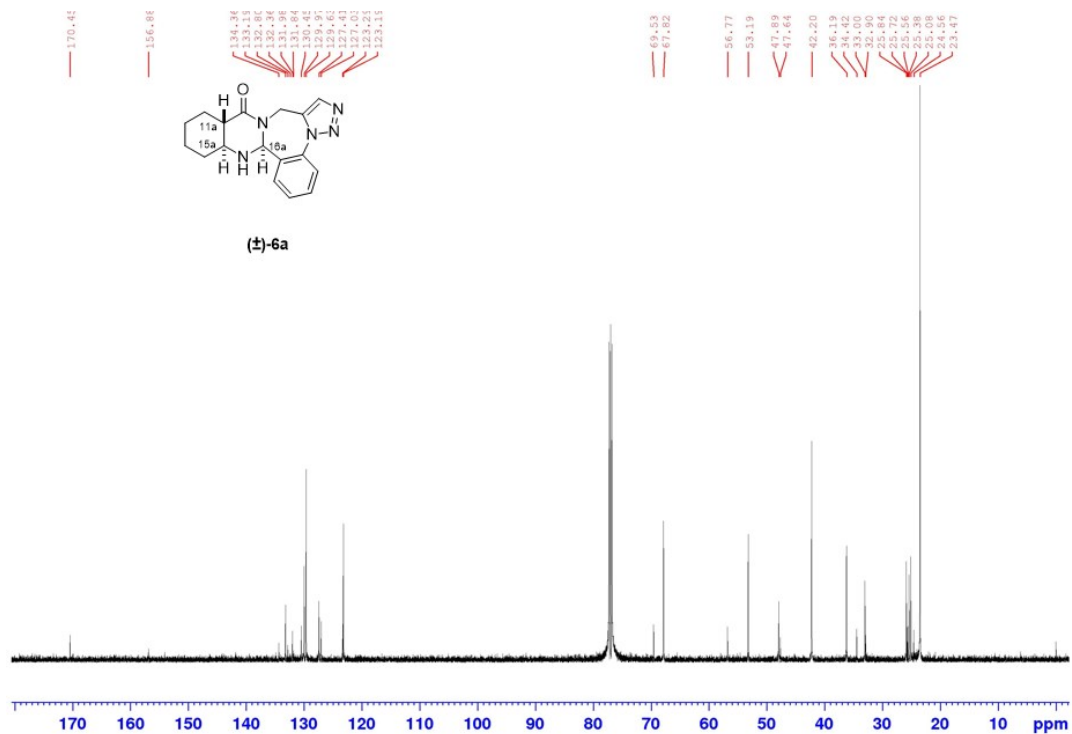

$^{13}\text{C}$  NMR Spectrum of (*r*-11a,*t*-15a,*t*-16a)-11a,12,13,14,15,15a,16,16a-octahydrobenzo[5,6][1,2,3]triazolo[5',1':3,4][1,4]diazepino[7,1-*b*]quinazolin-11(9*H*)-one ( $\pm$ )-6a ( $\text{CDCl}_3$ )

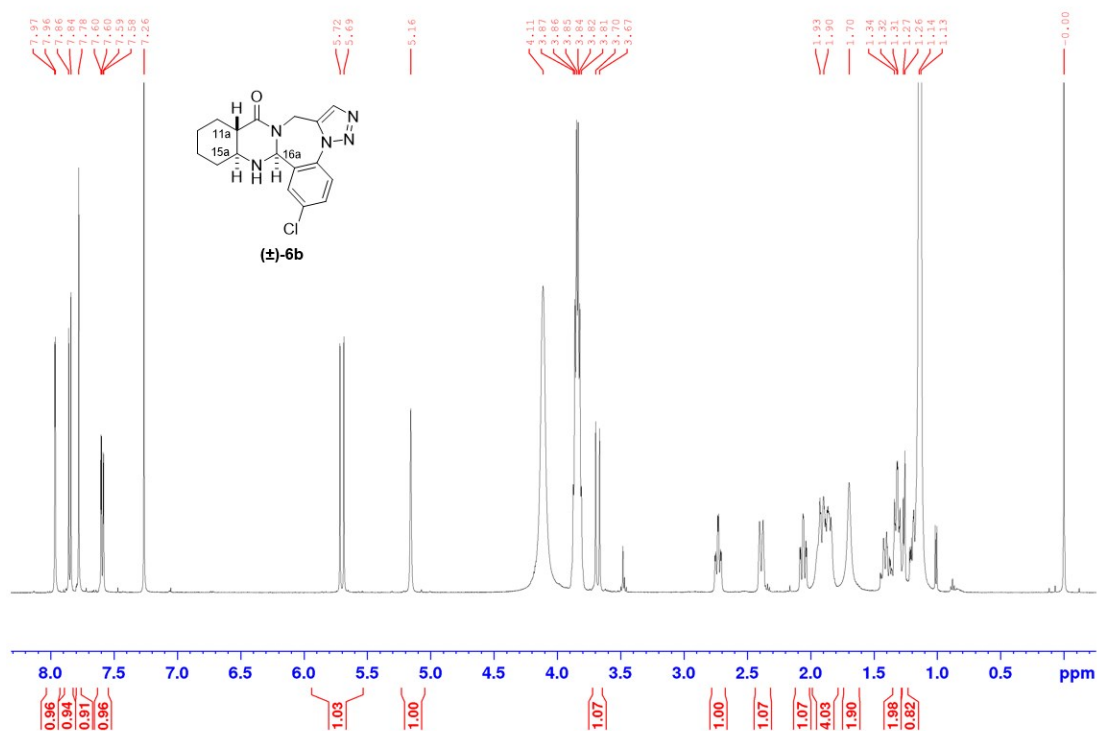

<sup>1</sup>H NMR Spectrum of (*r*-11a,*t*-15a,*t*-16a)-2-chloro-11a,12,13,14,15,15a,16,16a-octahydrobenzo[5,6][1,2,3]triazolo[5',1':3,4][1,4]diazepino[7,1-*b*]quinazolin-11(9*H*)-one (±)-6b (CDCl<sub>3</sub>)

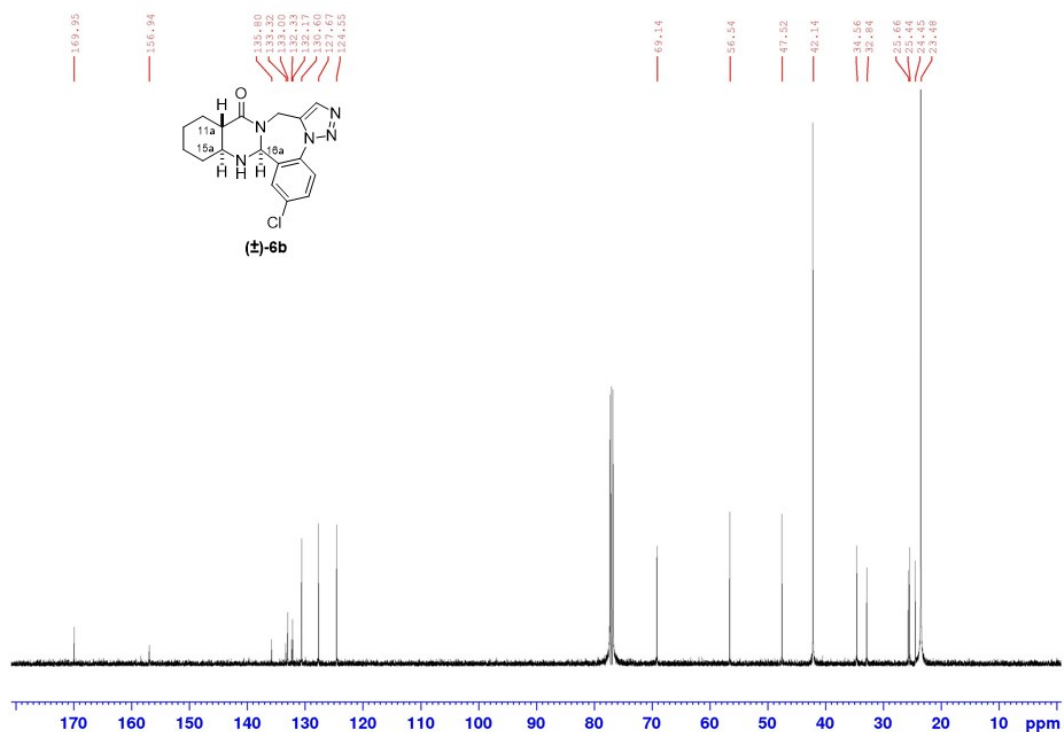

<sup>13</sup>C NMR Spectrum of (*r*-11a,*t*-15a,*t*-16a)-2-chloro-11a,12,13,14,15,15a,16,16a-octahydrobenzo[5,6][1,2,3]triazolo[5',1':3,4][1,4]diazepino[7,1-*b*]quinazolin-11(9*H*)-one (±)-6b (CDCl<sub>3</sub>)

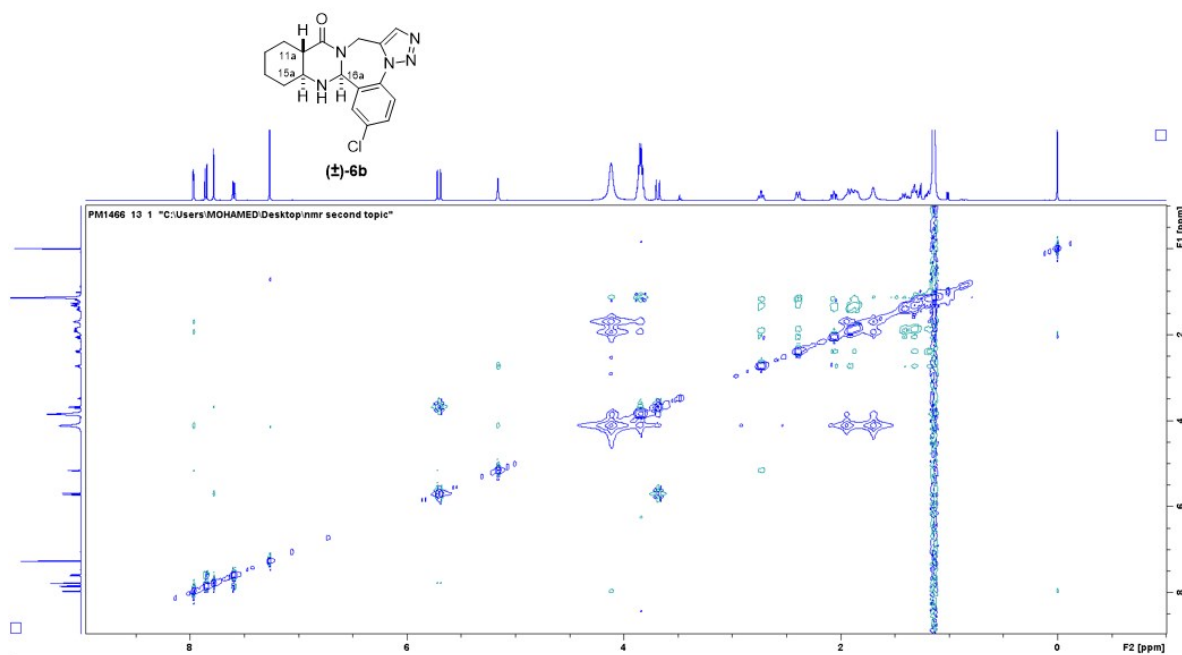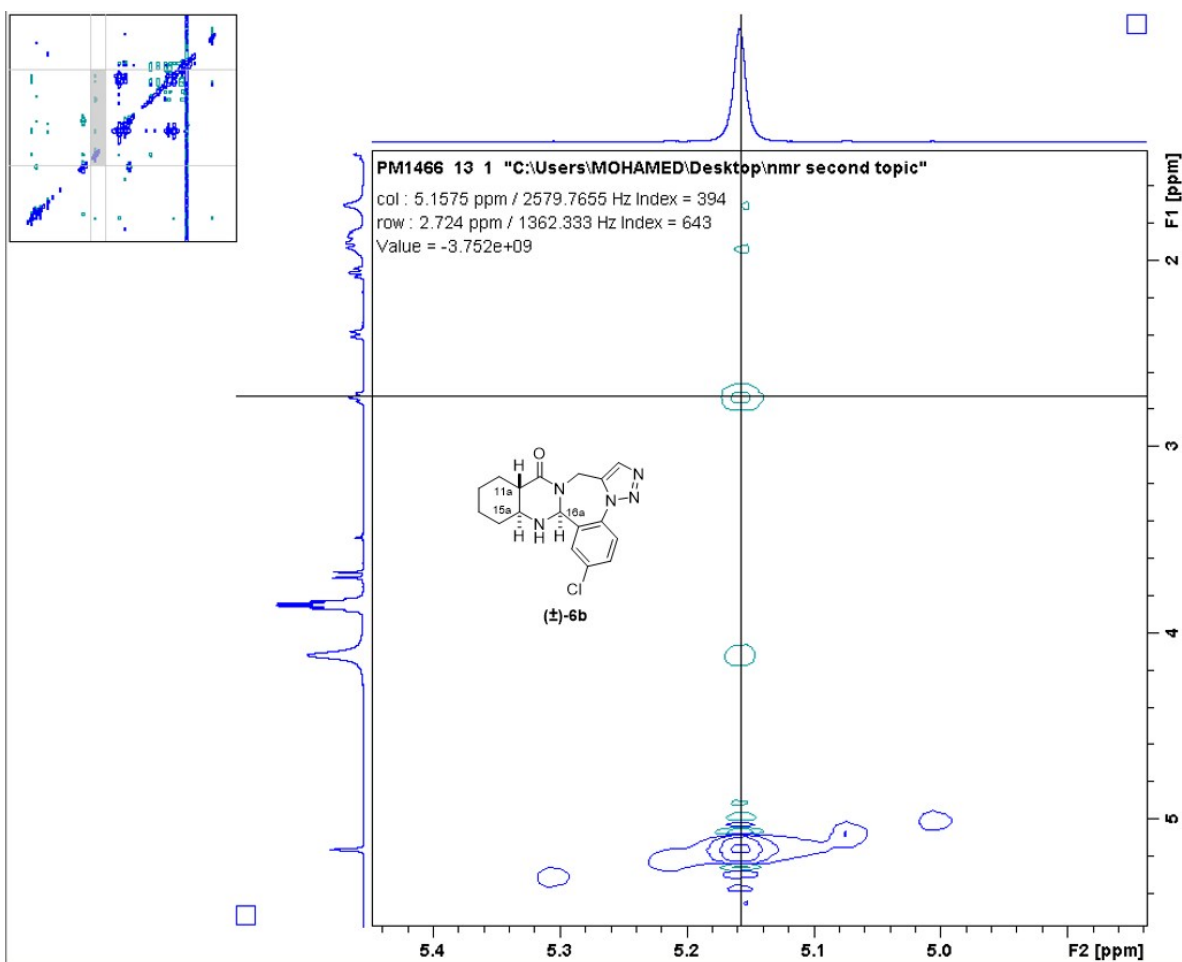

NOESY NMR Spectrum of (*r*-11a,*t*-15a,*t*-16a)-2-chloro-11a,12,13,14,15,15a,16,16a-octahydrobenzo[5,6][1,2,3]triazolo[5',1':3,4][1,4]diazepino[7,1-*b*]quinazolin-11(9*H*)-one (±)-6b (CDCl<sub>3</sub>)

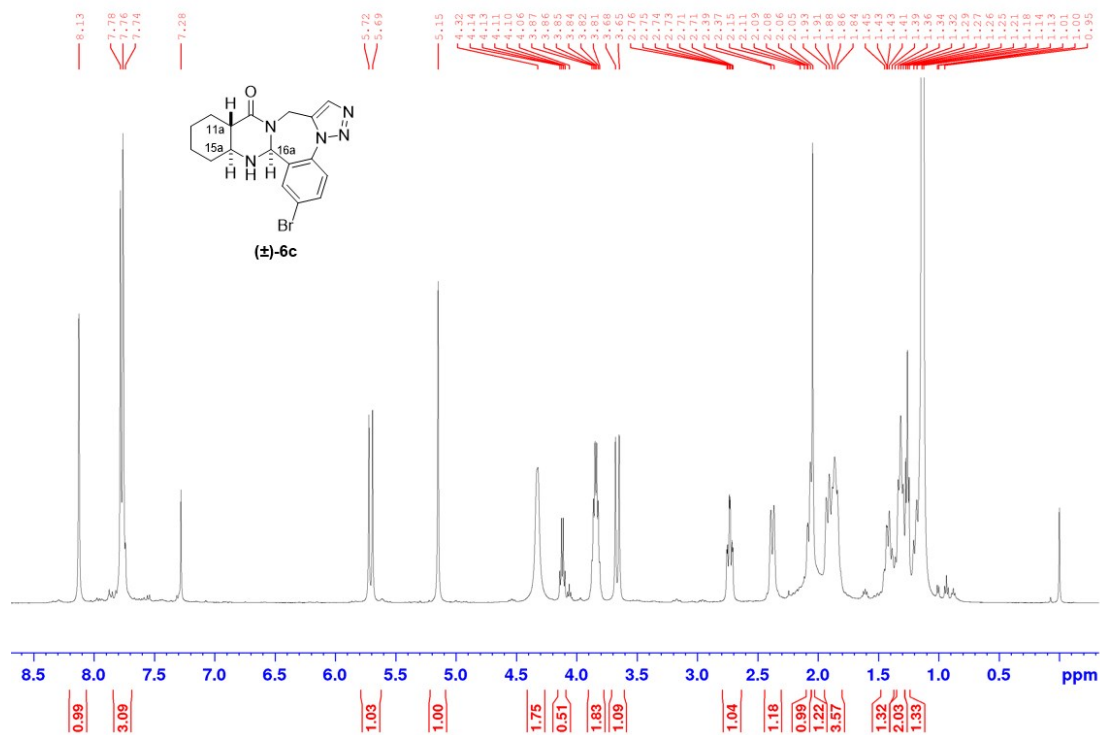

<sup>1</sup>H NMR Spectrum of (*r*-11a,*t*-15a,*t*-16a)-2-bromo-11a,12,13,14,15,15a,16,16a-octahydrobenzo[5,6][1,2,3]triazolo[5,1':3,4][1,4]diazepino[7,1-*b*]quinazolin-11(9*H*)-one (±)-6c (CDCl<sub>3</sub>)

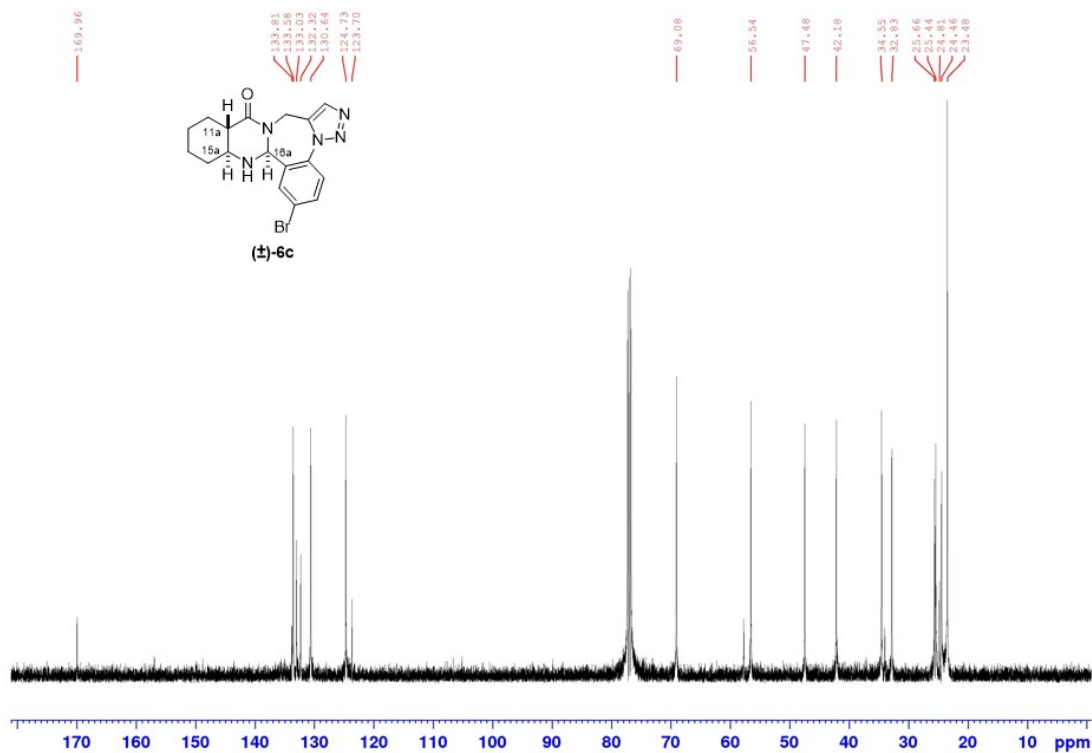

<sup>13</sup>C NMR Spectrum of (*r*-11a,*t*-15a,*t*-16a)-2-bromo-11a,12,13,14,15,15a,16,16a-octahydrobenzo[5,6][1,2,3]triazolo[5,1':3,4][1,4]diazepino[7,1-*b*]quinazolin-11(9*H*)-one (±)-6c (CDCl<sub>3</sub>)



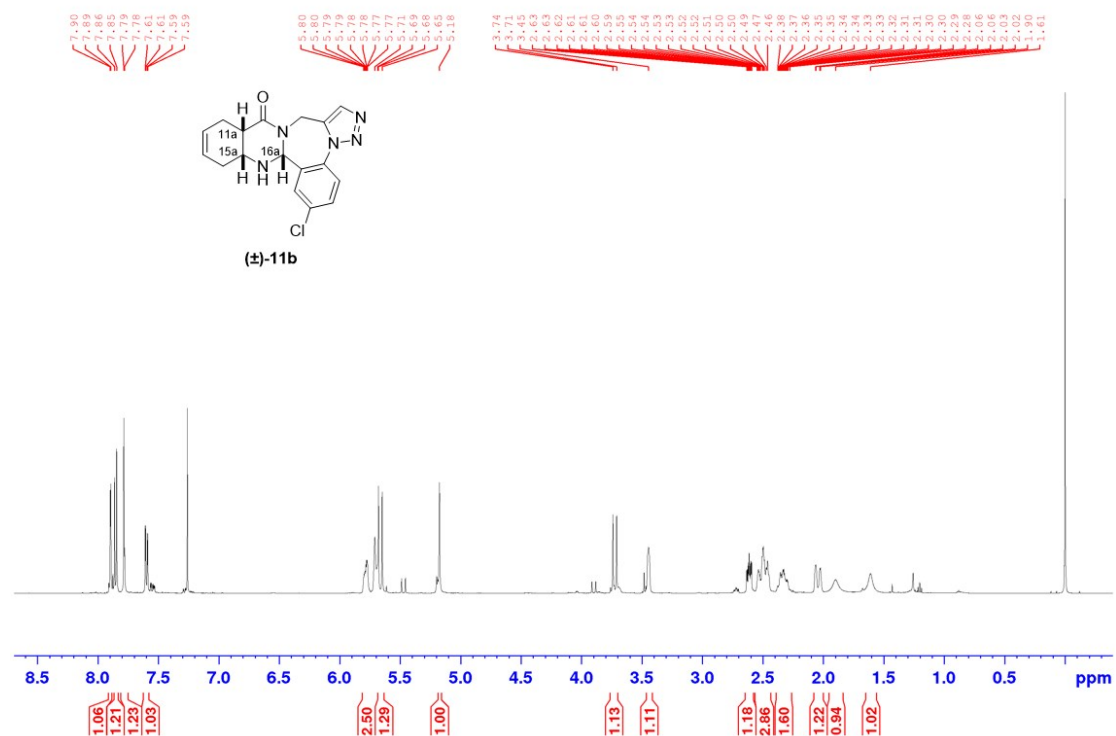

<sup>1</sup>H NMR Spectrum of (*r*-11a,*c*-15a,*c*-16a)-2-chloro-11a,12,15,15a,16,16a-hexahydrobenzo[5,6][1,2,3]triazolo[5',1':3,4][1,4]diazepino[7,1-*b*]quinazolin-11(9*H*)-one (**±**)-**11b** (CDCl<sub>3</sub>)

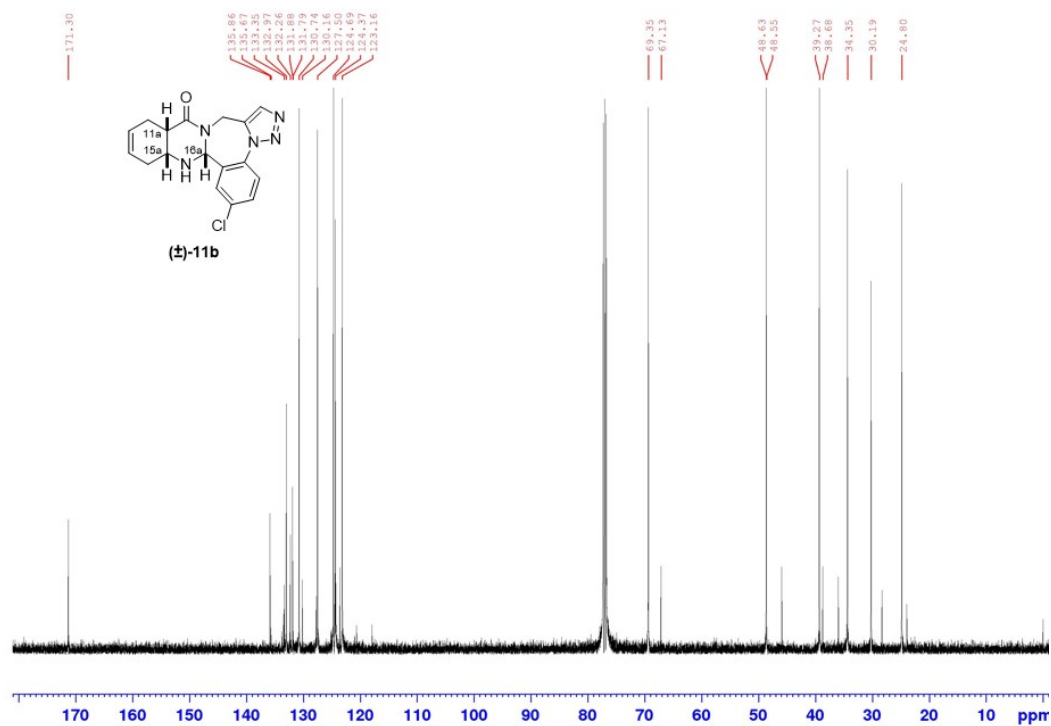

<sup>13</sup>C NMR Spectrum (*r*-11a,*c*-15a,*c*-16a)-2-chloro-11a,12,15,15a,16,16a-hexahydrobenzo[5,6][1,2,3]triazolo[5',1':3,4][1,4]diazepino[7,1-*b*]quinazolin-11(9*H*)-one (**±**)-**11b** (CDCl<sub>3</sub>)

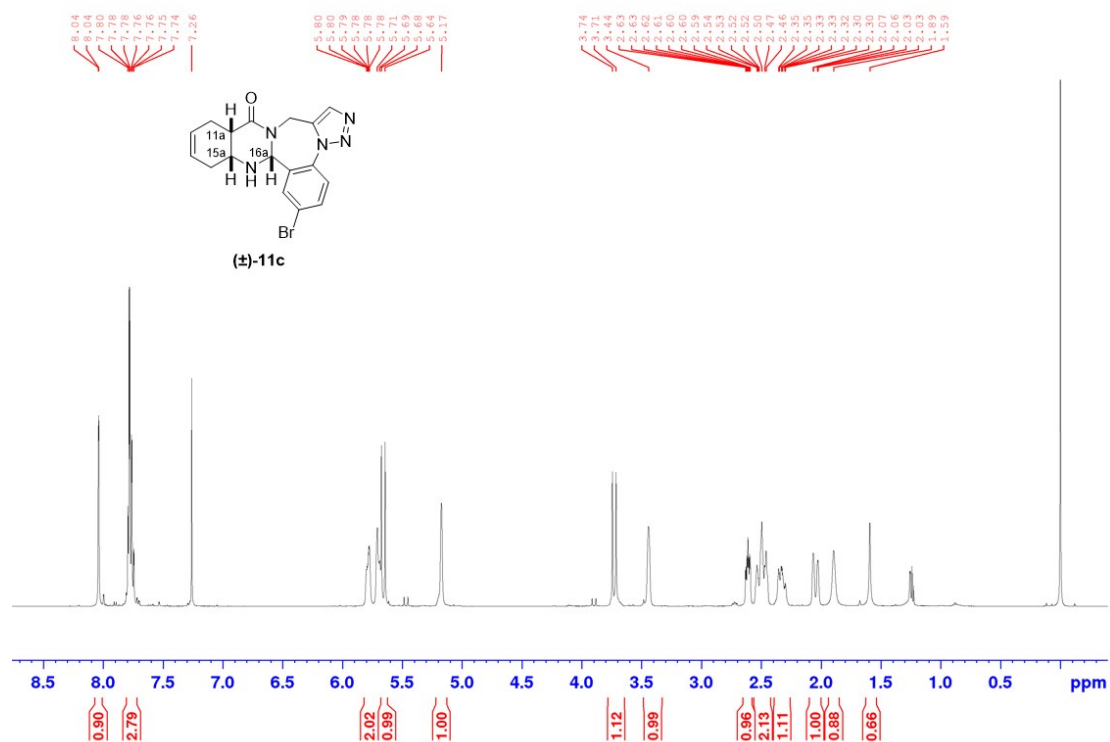

<sup>1</sup>H NMR Spectrum of (*r*-11a,*c*-15a,*c*-16a)-2-bromo-11a,12,15,15a,16,16a-hexahydrobenzo[5,6][1,2,3]triazolo[5',1':3,4][1,4]diazepino[7,1-*b*]quinazolin-11(9*H*)-one (±)-11c (CDCl<sub>3</sub>)

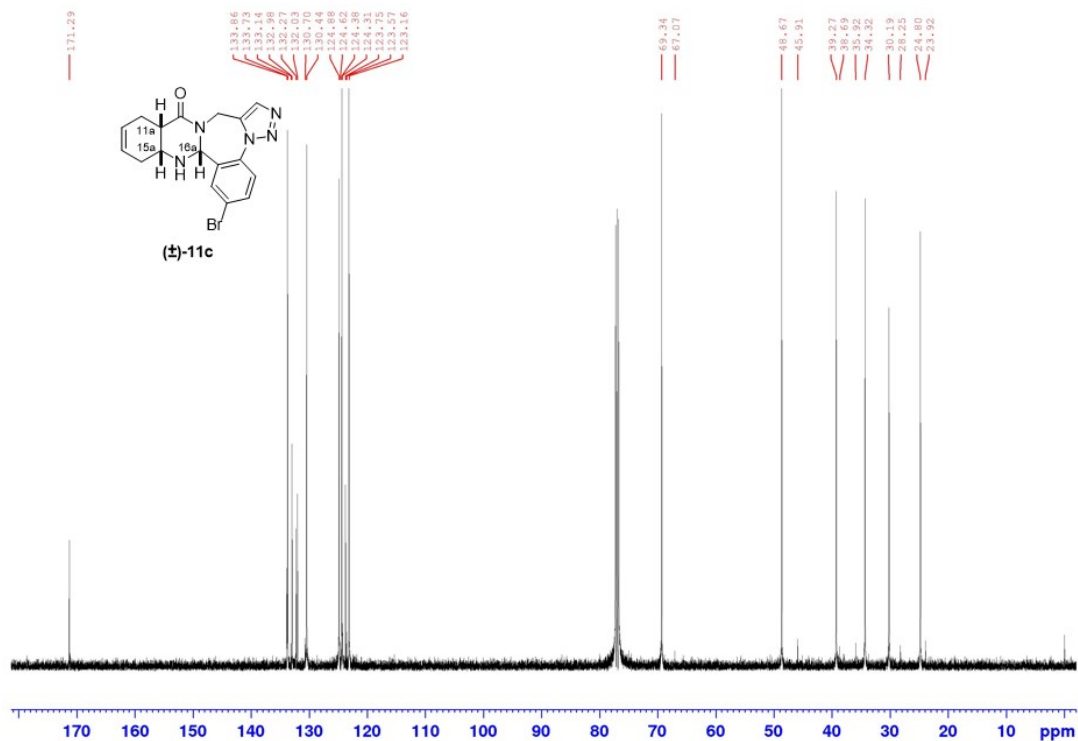

<sup>13</sup>C NMR Spectrum of (*r*-11a,*c*-15a,*c*-16a)-2-bromo-11a,12,15,15a,16,16a-hexahydrobenzo[5,6][1,2,3]triazolo[5',1':3,4][1,4]diazepino[7,1-*b*]quinazolin-11(9*H*)-one (±)-11c (CDCl<sub>3</sub>)





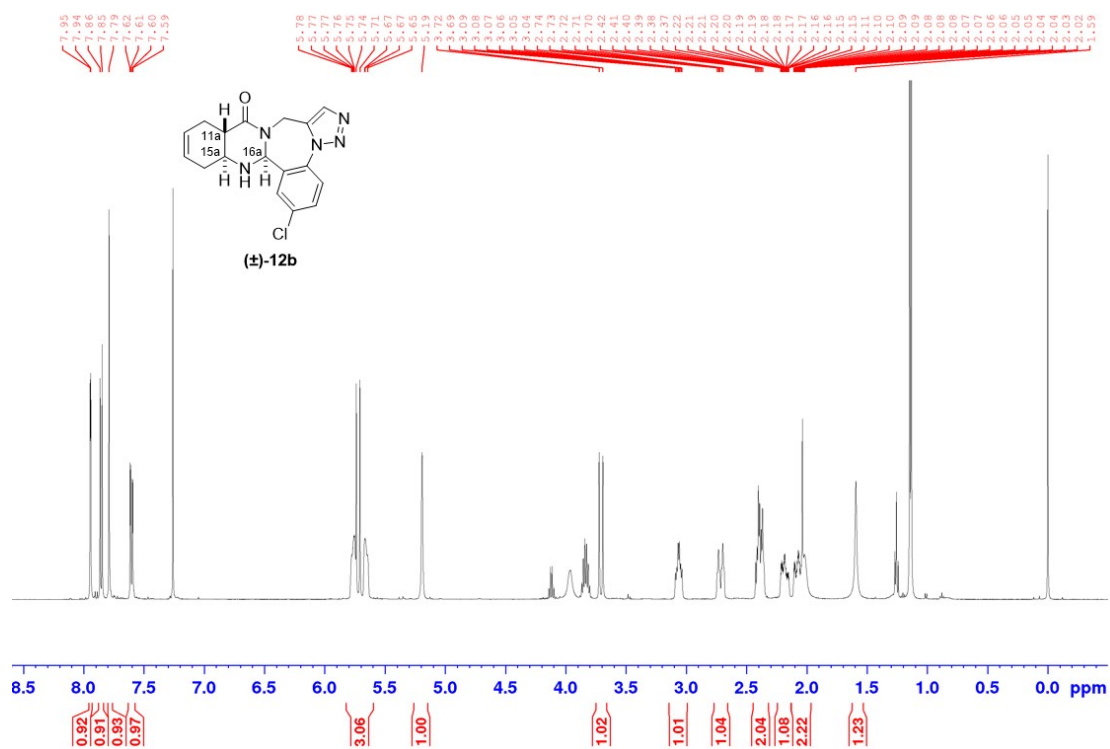

**<sup>1</sup>H NMR Spectrum of (r-11a,t-15a,t-16a)-2-chloro-11a,12,15,15a,16,16a-hexahydrobenzo[5,6][1,2,3]triazolo[5',1':3,4][1,4]diazepino[7,1-b]quinazolin-11(9H)-one (±)-12b (CDCl<sub>3</sub>)**

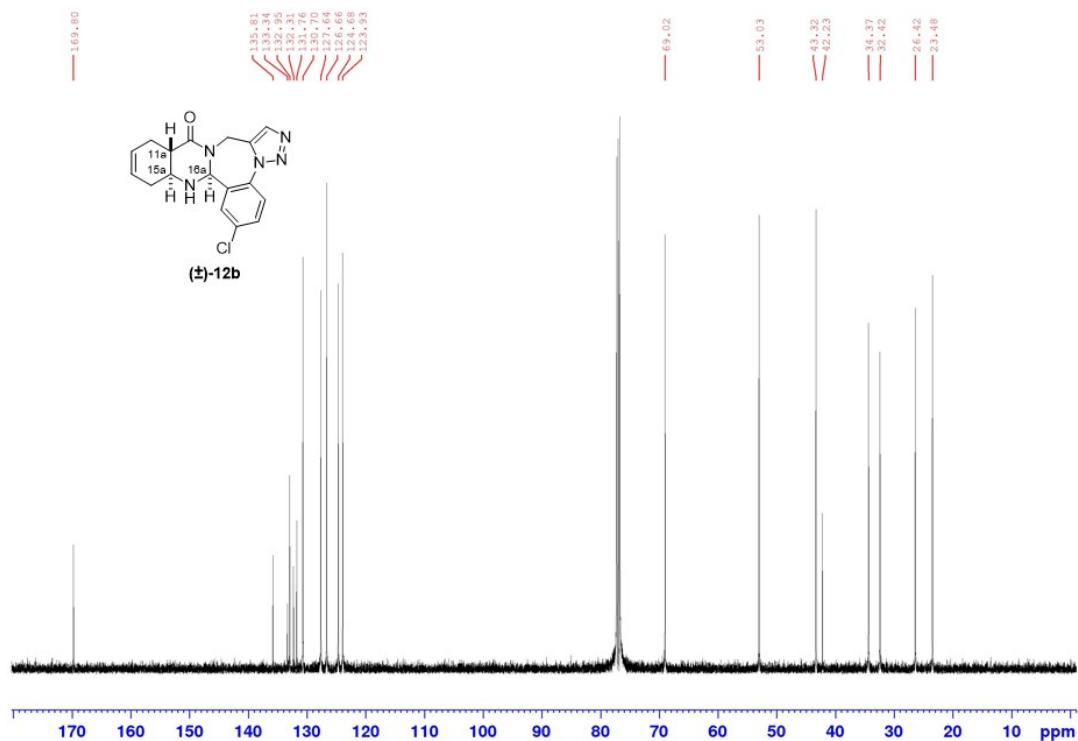

**<sup>13</sup>C NMR Spectrum of (r-11a,t-15a,t-16a)-2-chloro-11a,12,15,15a,16,16a-hexahydrobenzo[5,6][1,2,3]triazolo[5',1':3,4][1,4]diazepino[7,1-b]quinazolin-11(9H)-one (±)-12b (CDCl<sub>3</sub>)**

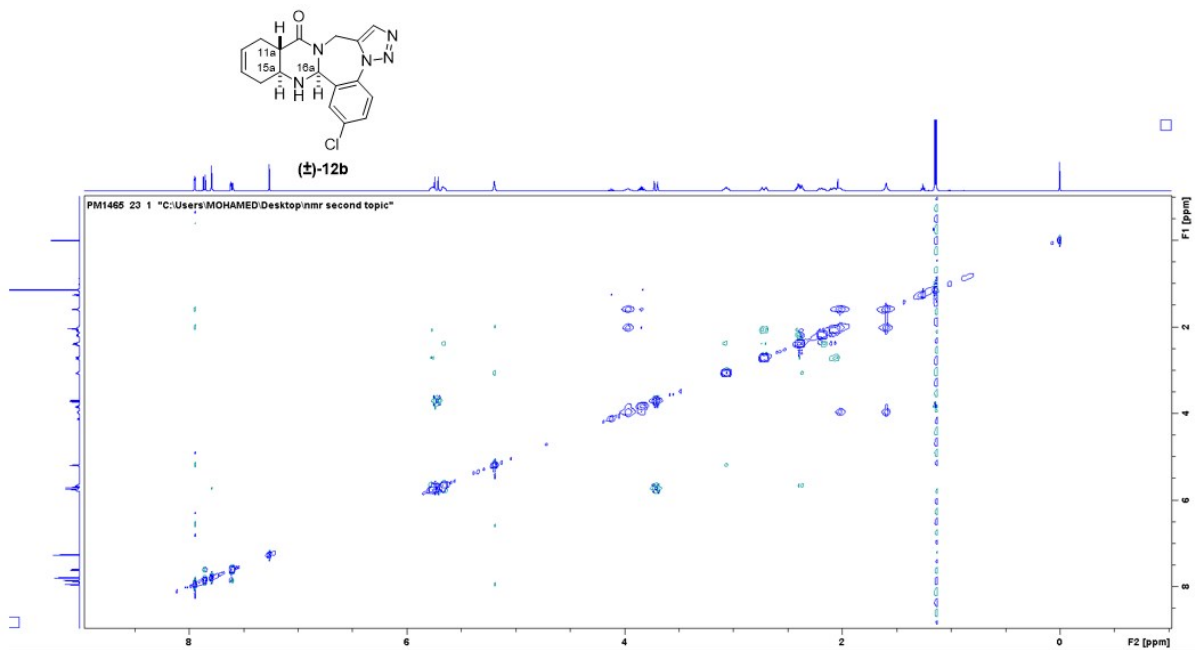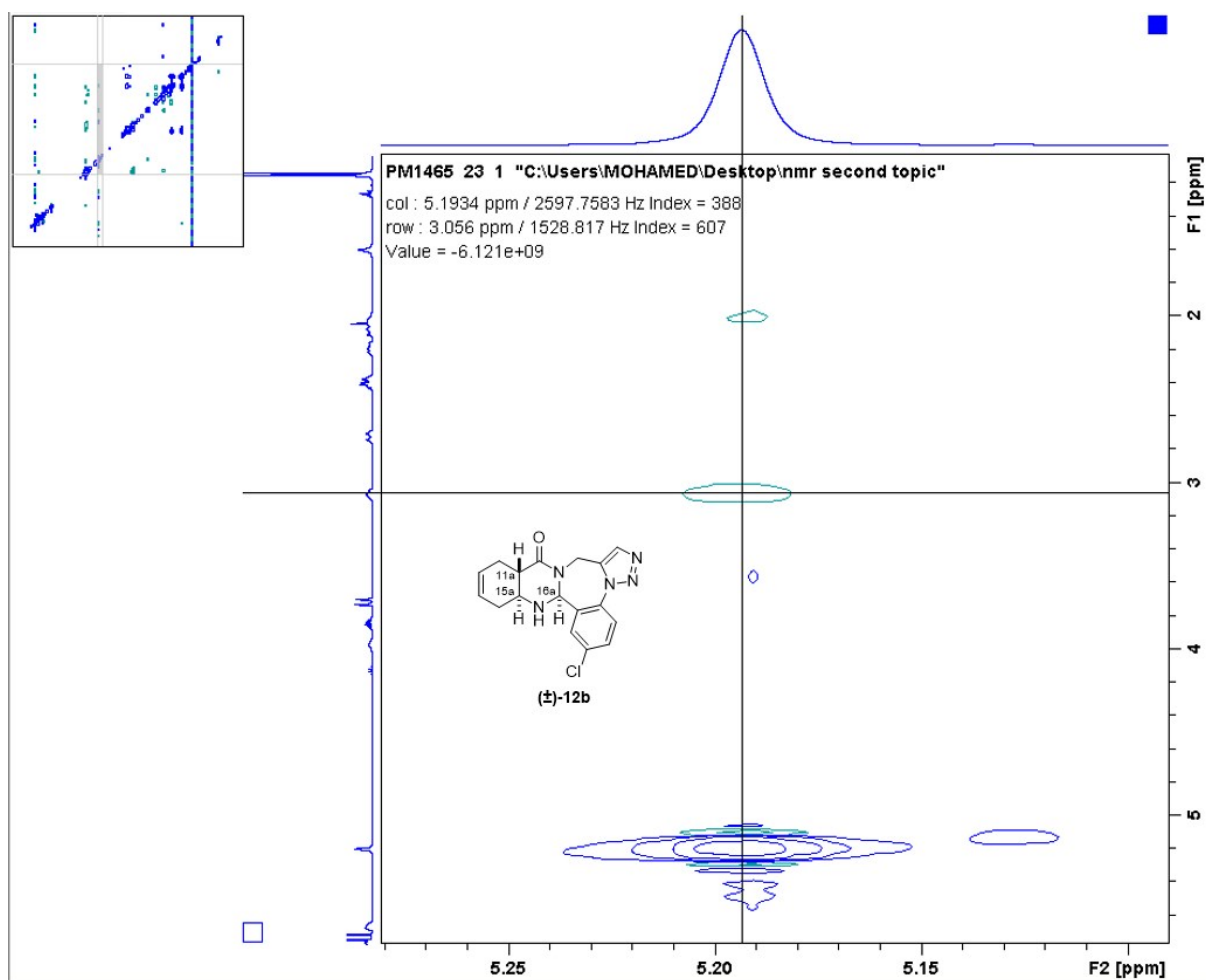

NOESY NMR Spectrum of (*r*-11a,*t*-15a,*t*-16a)-2-chloro-11a,12,15,15a,16,16a-hexahydrobenzo[5,6][1,2,3]triazolo[5',1':3,4][1,4]diazepino[7,1-*b*]quinazolin-11(9*H*)-one (±)-12b (CDCl<sub>3</sub>)

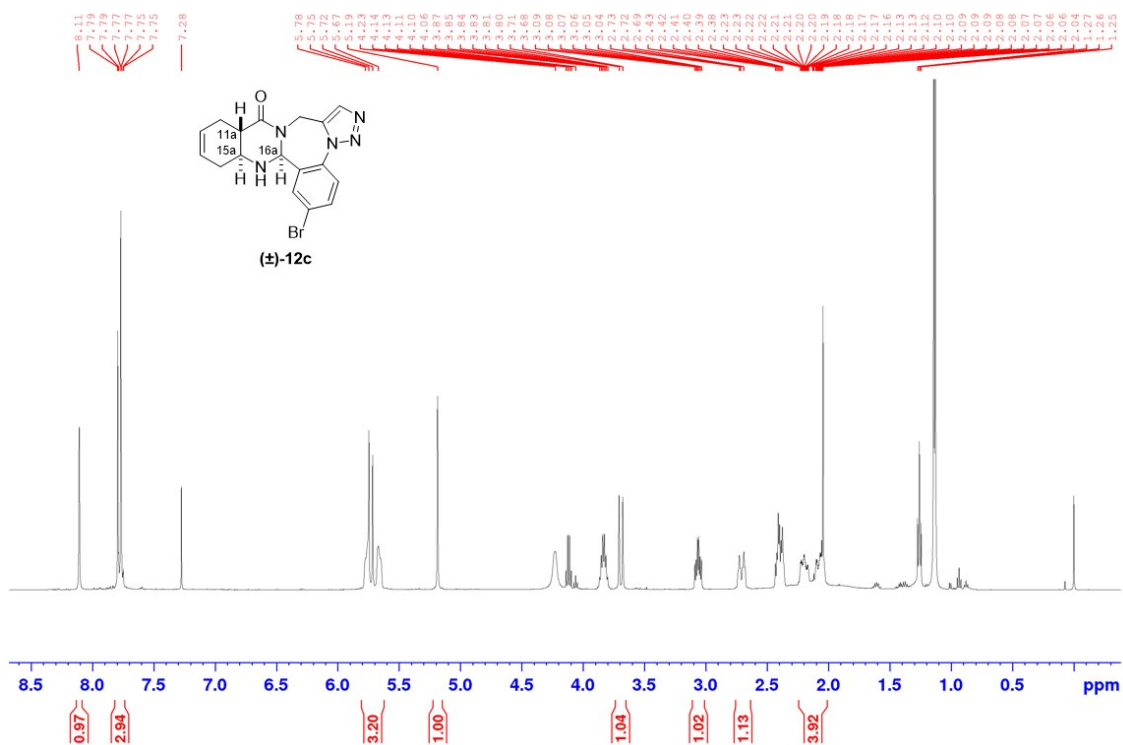

$^1\text{H}$  NMR Spectrum of (*r*-11a,*t*-15a,*t*-16a)-2-bromo-11a,12,15,15a,16,16a-hexahydrobenzo[5,6][1,2,3]triazolo[5',1':3,4][1,4]diazepino[7,1-*b*]quinazolin-11(9*H*)-one ( $\pm$ )-**12c** ( $\text{CDCl}_3$ )

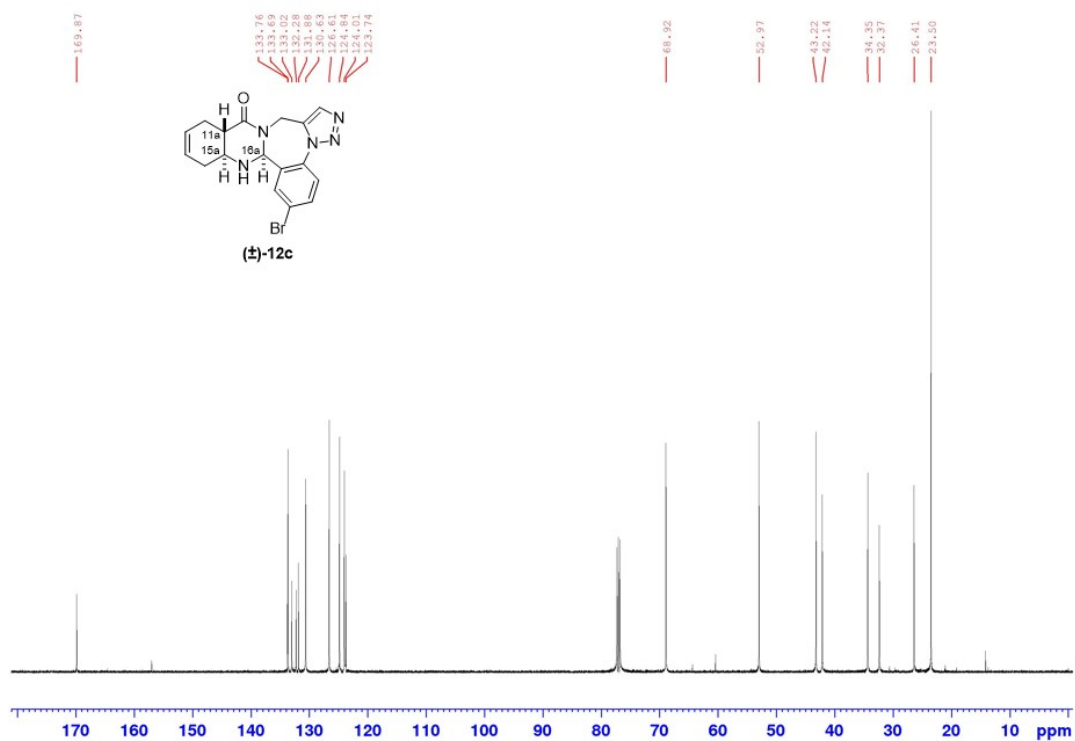

$^{13}\text{C}$  NMR Spectrum of (*r*-11a,*t*-15a,*t*-16a)-2-bromo-11a,12,15,15a,16,16a-hexahydrobenzo[5,6][1,2,3]triazolo[5',1':3,4][1,4]diazepino[7,1-*b*]quinazolin-11(9*H*)-one ( $\pm$ )-**12c** ( $\text{CDCl}_3$ )

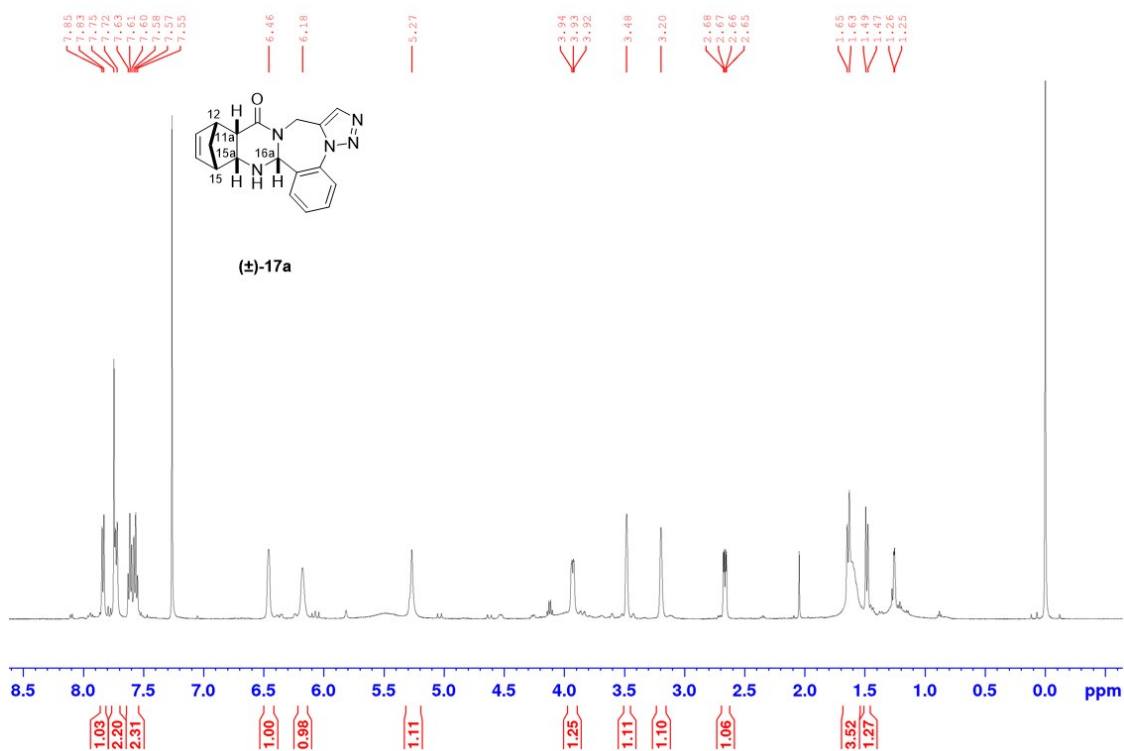

$^1\text{H}$  NMR Spectrum of (*r*-11a,*t*-12,*t*-15,*c*-15a,*c*-16a)-11a,12,15,15a,16,16a-hexahydro-12,15-methanobenzo[5,6][1,2,3]triazolo[5',1':3,4][1,4]diazepino[7,1-*b*]quinazolin-11(9*H*)-one ( $\pm$ )-**17a** ( $\text{CDCl}_3$ )

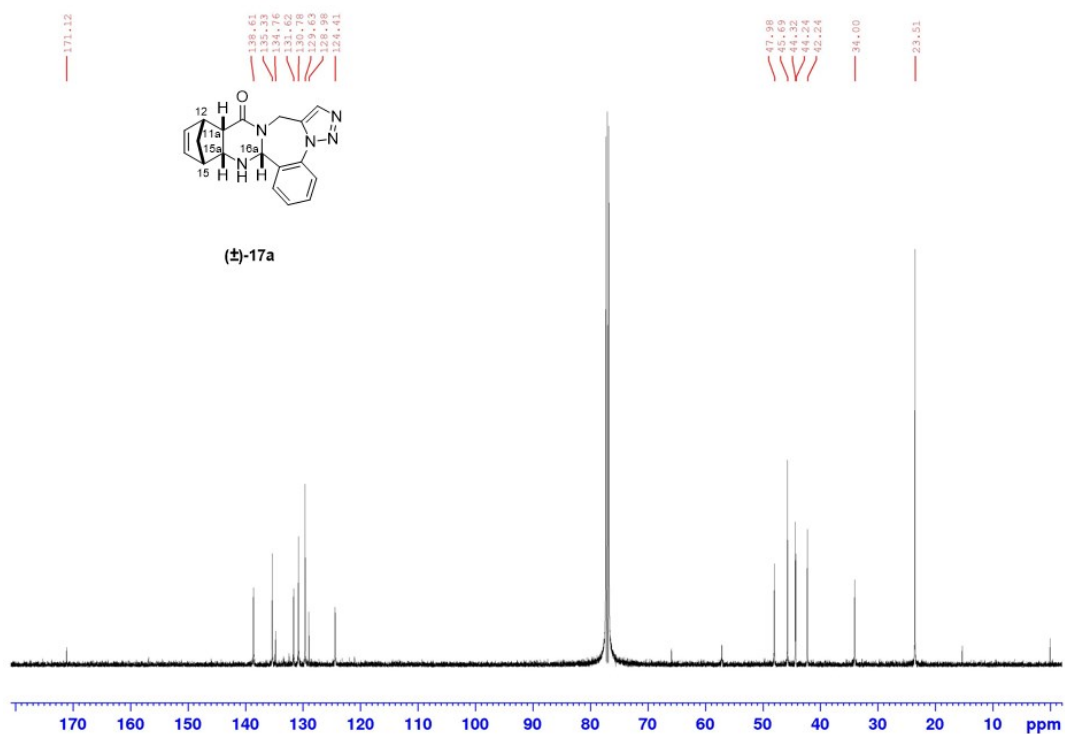

$^{13}\text{C}$  NMR Spectrum of (*r*-11a,*t*-12,*t*-15,*c*-15a,*c*-16a)-11a,12,15,15a,16,16a-hexahydro-12,15-methanobenzo[5,6][1,2,3]triazolo[5',1':3,4][1,4]diazepino[7,1-*b*]quinazolin-11(9*H*)-one ( $\pm$ )-**17a** ( $\text{CDCl}_3$ )

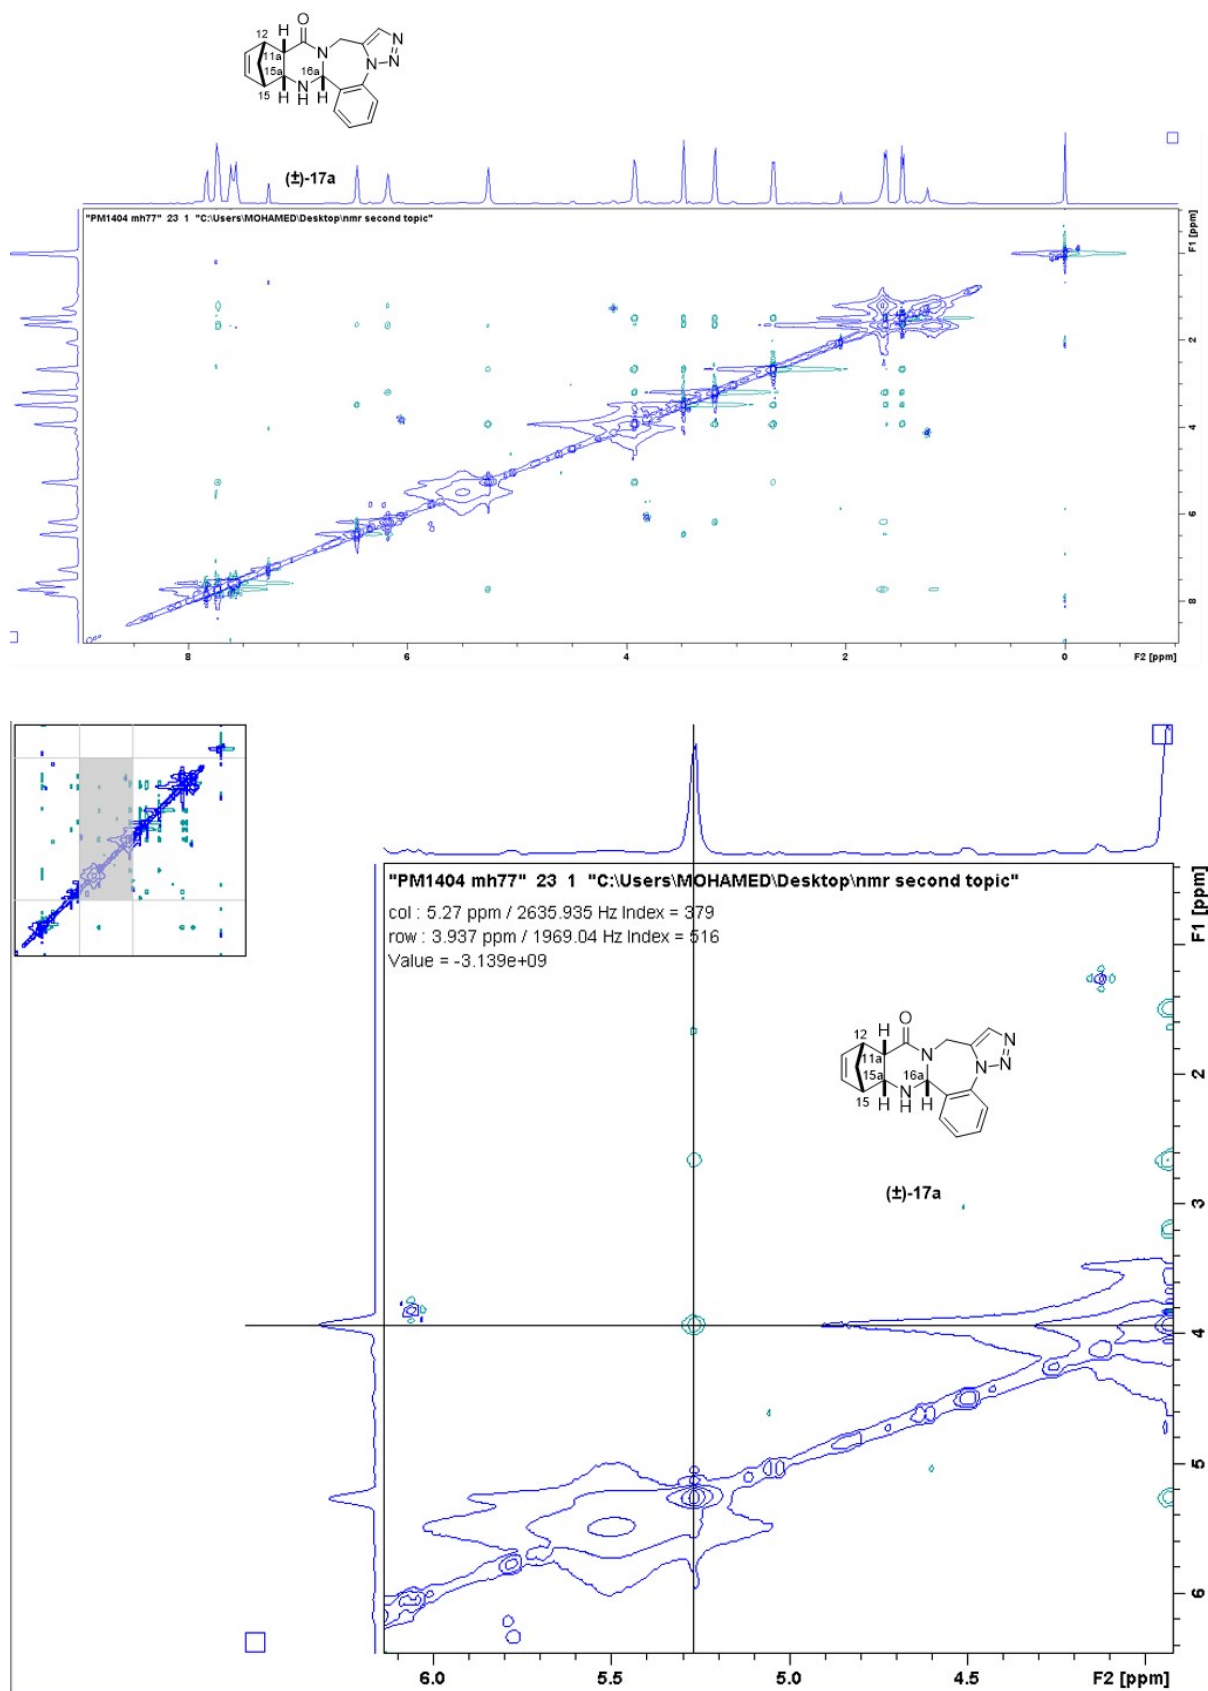

NOESY NMR Spectrum of (*r*-11a,*t*-12,*t*-15,*c*-15a,*c*-16a)-11a,12,15,15a,16,16a-hexahydro-12,15-methanobenzo[5,6][1,2,3]triazolo[5',1':3,4][1,4]diazepino[7,1-*b*]quinazolin-11(9*H*)-one (±)-17a (CDCl<sub>3</sub>)

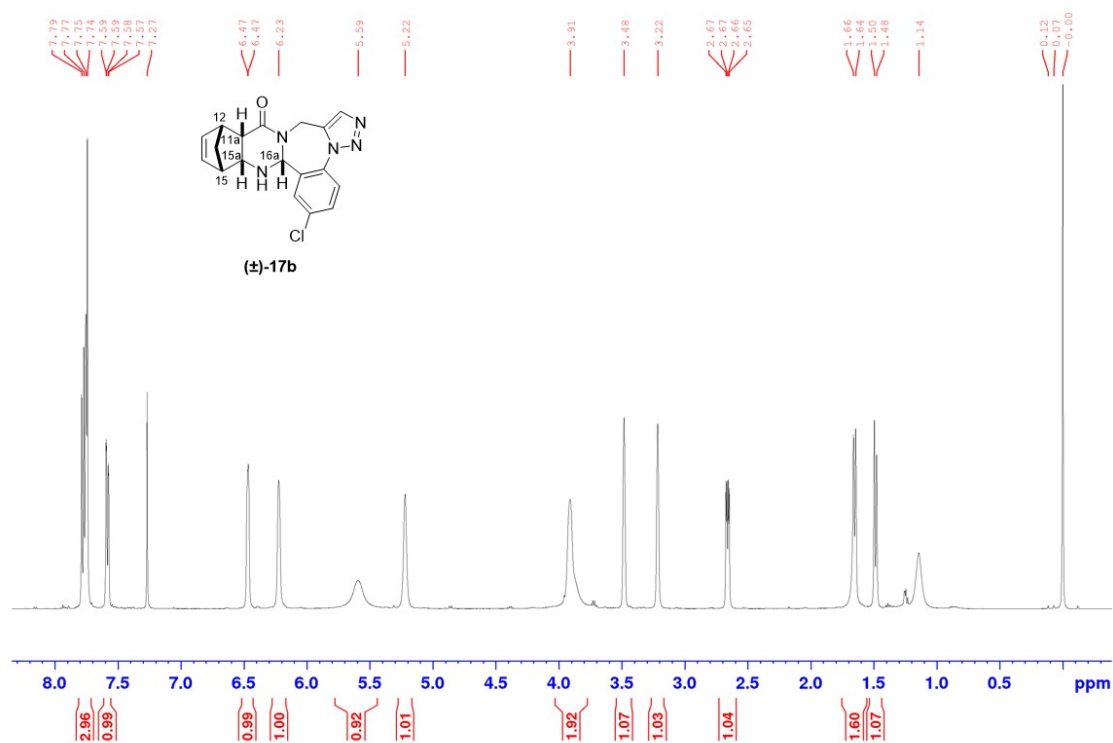

<sup>1</sup>H NMR Spectrum of (*r*-11a,*t*-12,*t*-15,*c*-15a,*c*-16a)-2-chloro-11a,12,15,15a,16,16a-hexahydro-12,15-methanobenzo[5,6][1,2,3]triazolo[5',1':3,4][1,4]diazepino[7,1-*b*]quinazolin-11(9*H*)-one (**±**)-**17b** (CDCl<sub>3</sub>)

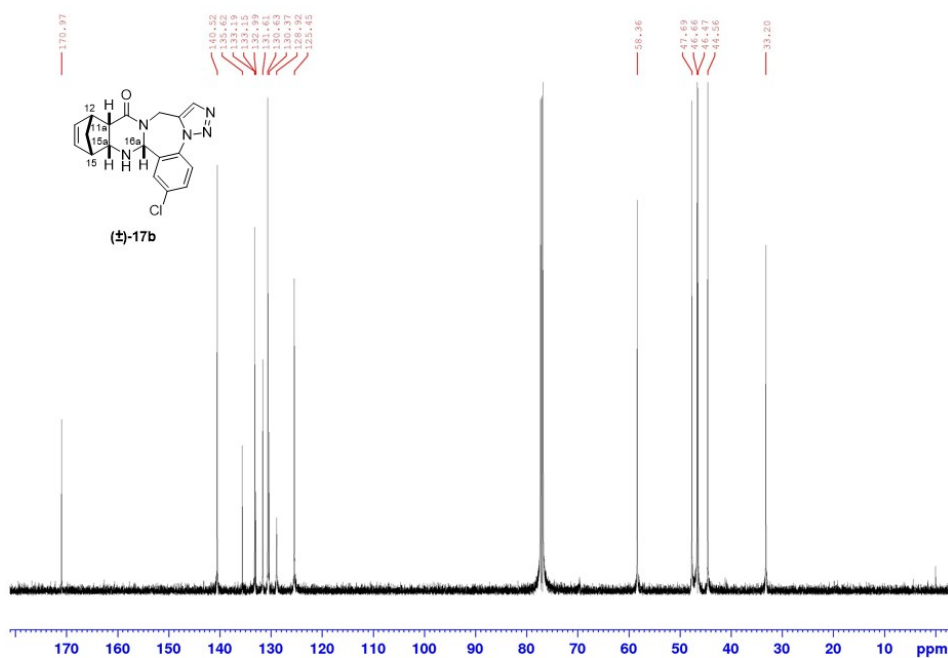

<sup>13</sup>C NMR Spectrum of (*r*-11a,*t*-12,*t*-15,*c*-15a,*c*-16a)-2-chloro-11a,12,15,15a,16,16a-hexahydro-12,15-methanobenzo[5,6][1,2,3]triazolo[5',1':3,4][1,4]diazepino[7,1-*b*]quinazolin-11(9*H*)-one (**±**)-**17b** (CDCl<sub>3</sub>)

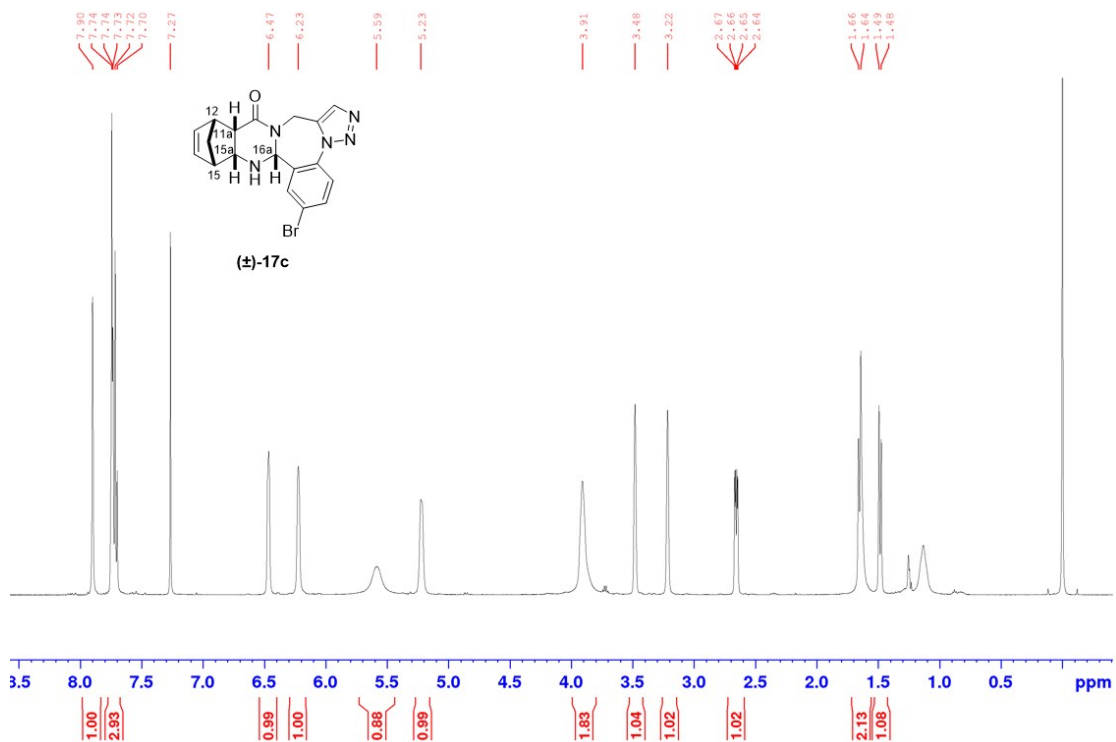

$^1\text{H}$  NMR Spectrum of (*r*-11a,*t*-12,*t*-15,*c*-15a,*c*-16a)-2-bromo-11a,12,15,15a,16,16a-hexahydro-12,15-methanobenzo[5,6][1,2,3]triazolo[5',1':3,4][1,4]diazepino[7,1-*b*]quinazolin-11(9*H*)-one (**(±)-17c**) ( $\text{CDCl}_3$ )

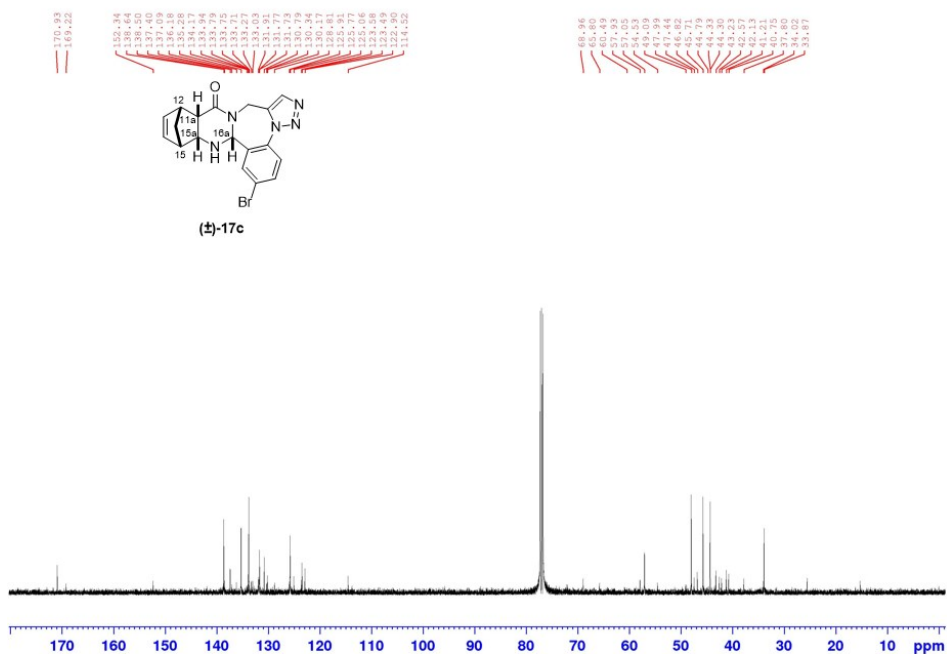

$^{13}\text{C}$  NMR Spectrum of (*r*-11a,*t*-12,*t*-15,*c*-15a,*c*-16a)-2-bromo-11a,12,15,15a,16,16a-hexahydro-12,15-methanobenzo[5,6][1,2,3]triazolo[5',1':3,4][1,4]diazepino[7,1-*b*]quinazolin-11(9*H*)-one (**(±)-17c**) ( $\text{CDCl}_3$ )



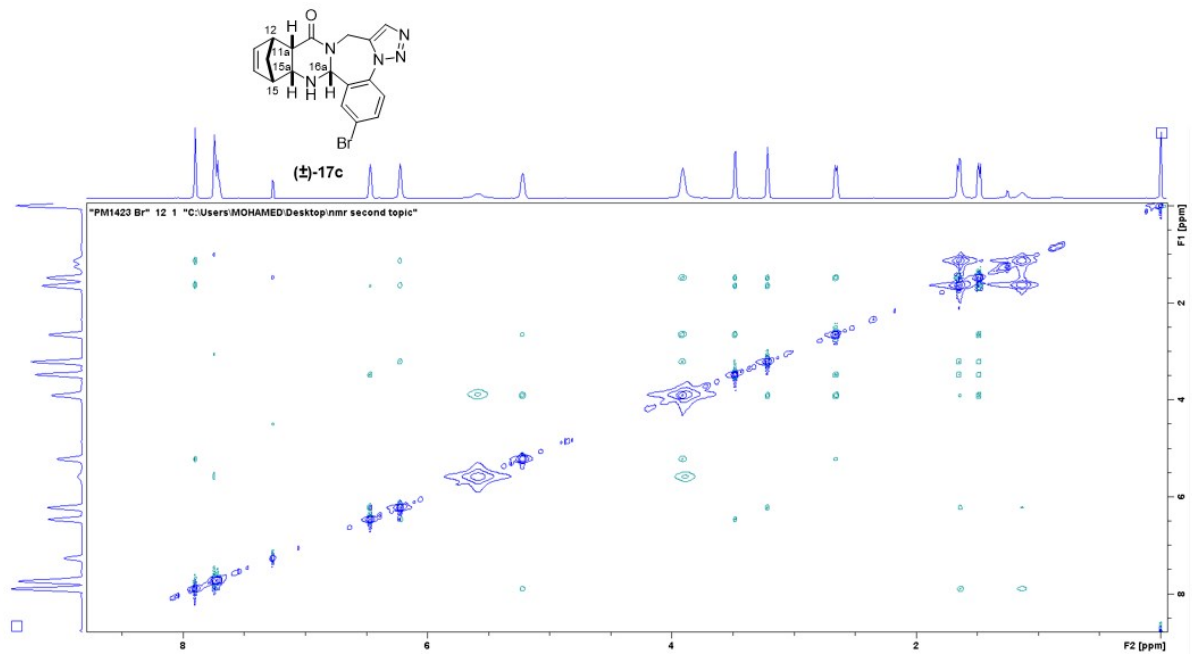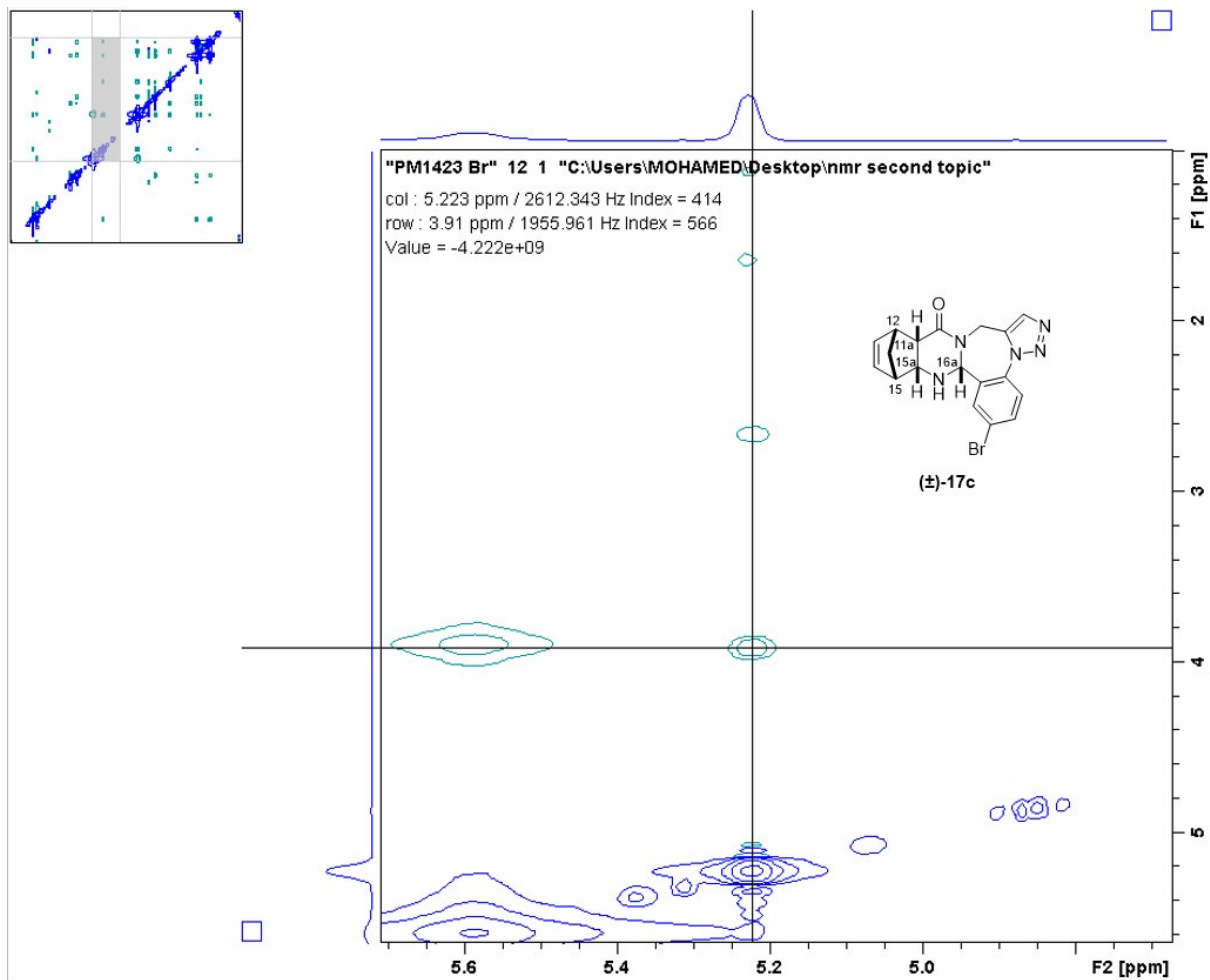

NOESY NMR Spectrum of (*r*-11a,*t*-12,*t*-15,*c*-15a,*c*-16a)-2-bromo-11a,12,15,15a,16,16a-hexahydro-12,15-methanobenzo[5,6][1,2,3]triazolo[5',1':3,4][1,4]diazepino[7,1-*b*]quinazolin-11(9*H*)-one (±)-17c (CDCl<sub>3</sub>)

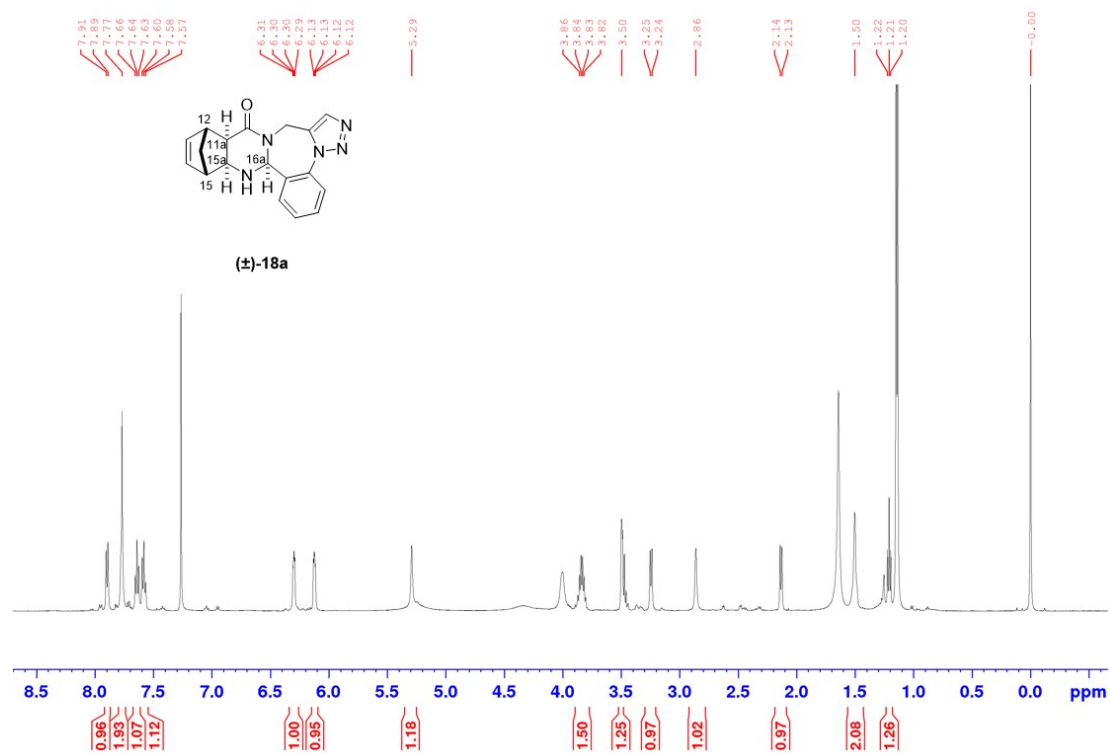

<sup>1</sup>H NMR Spectrum of (*r*-11a,*c*-12,*c*-15,*c*-15a,*c*-16a)-11a,12,15,15a,16,16a-hexahydro-12,15 methanobenzo[5,6][1,2,3]triazolo[5',1':3,4][1,4]diazepino[7,1-*b*]-quinazolin-11(9*H*)-one **18a** (CDCl<sub>3</sub>)

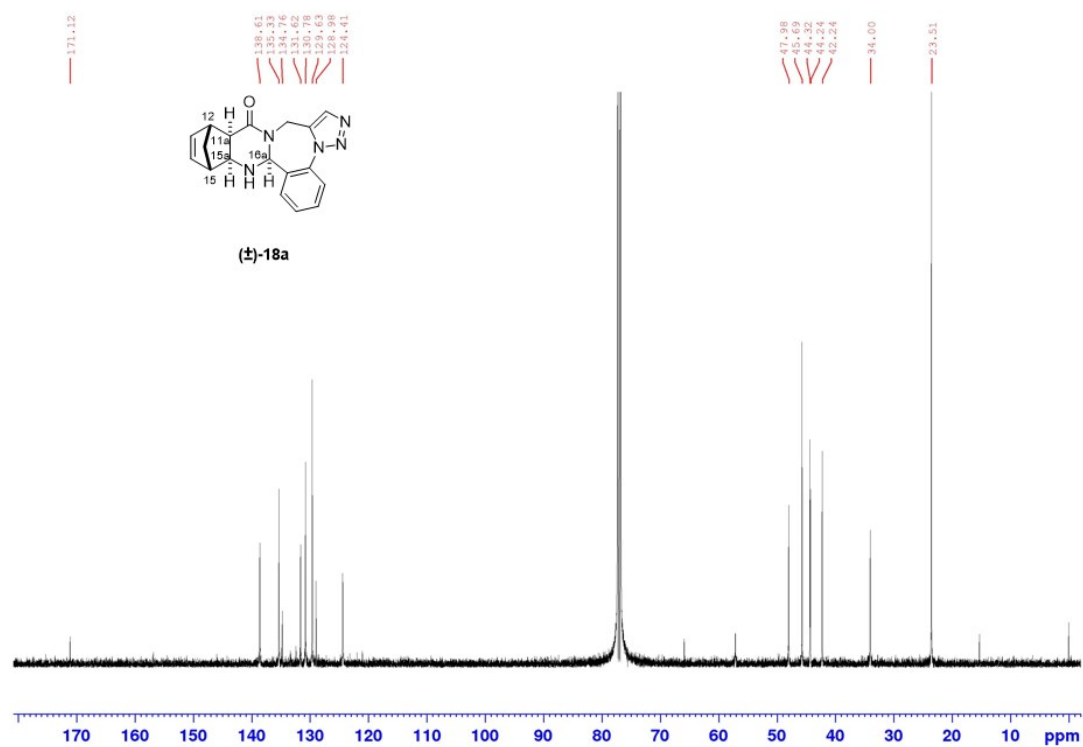

<sup>13</sup>C NMR Spectrum of (*r*-11a,*c*-12,*c*-15,*c*-15a,*c*-16a)-11a,12,15,15a,16,16a-hexahydro-12,15 methanobenzo[5,6][1,2,3]triazolo[5',1':3,4][1,4]diazepino[7,1-*b*]-quinazolin-11(9*H*)-one **18a** (CDCl<sub>3</sub>)

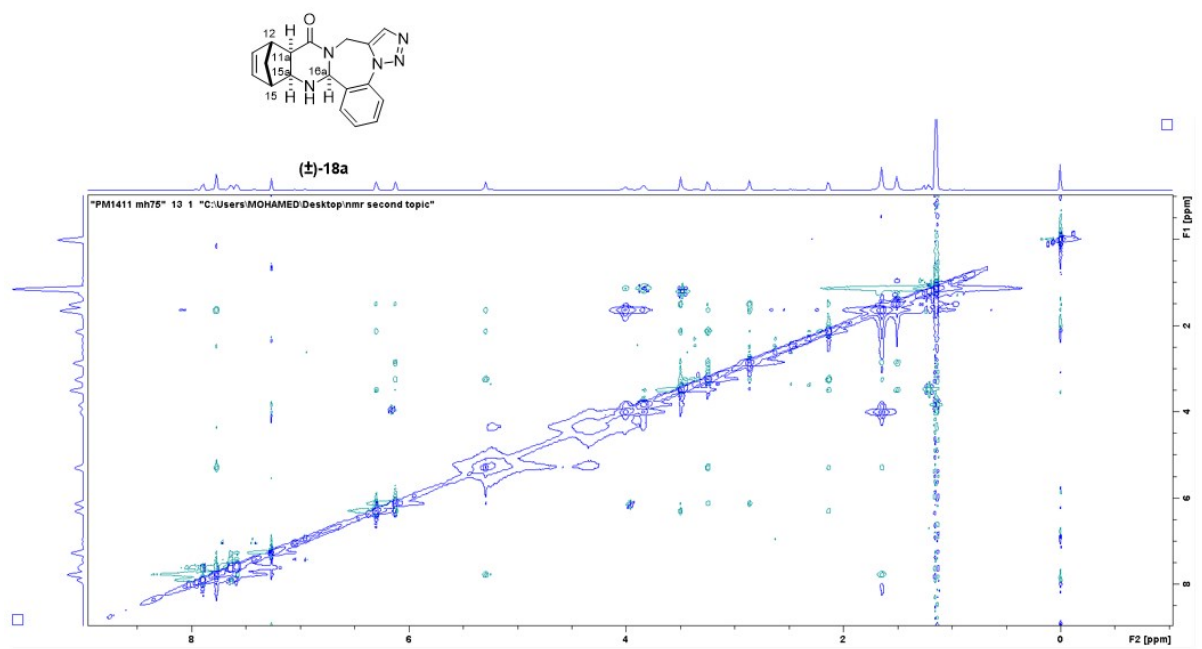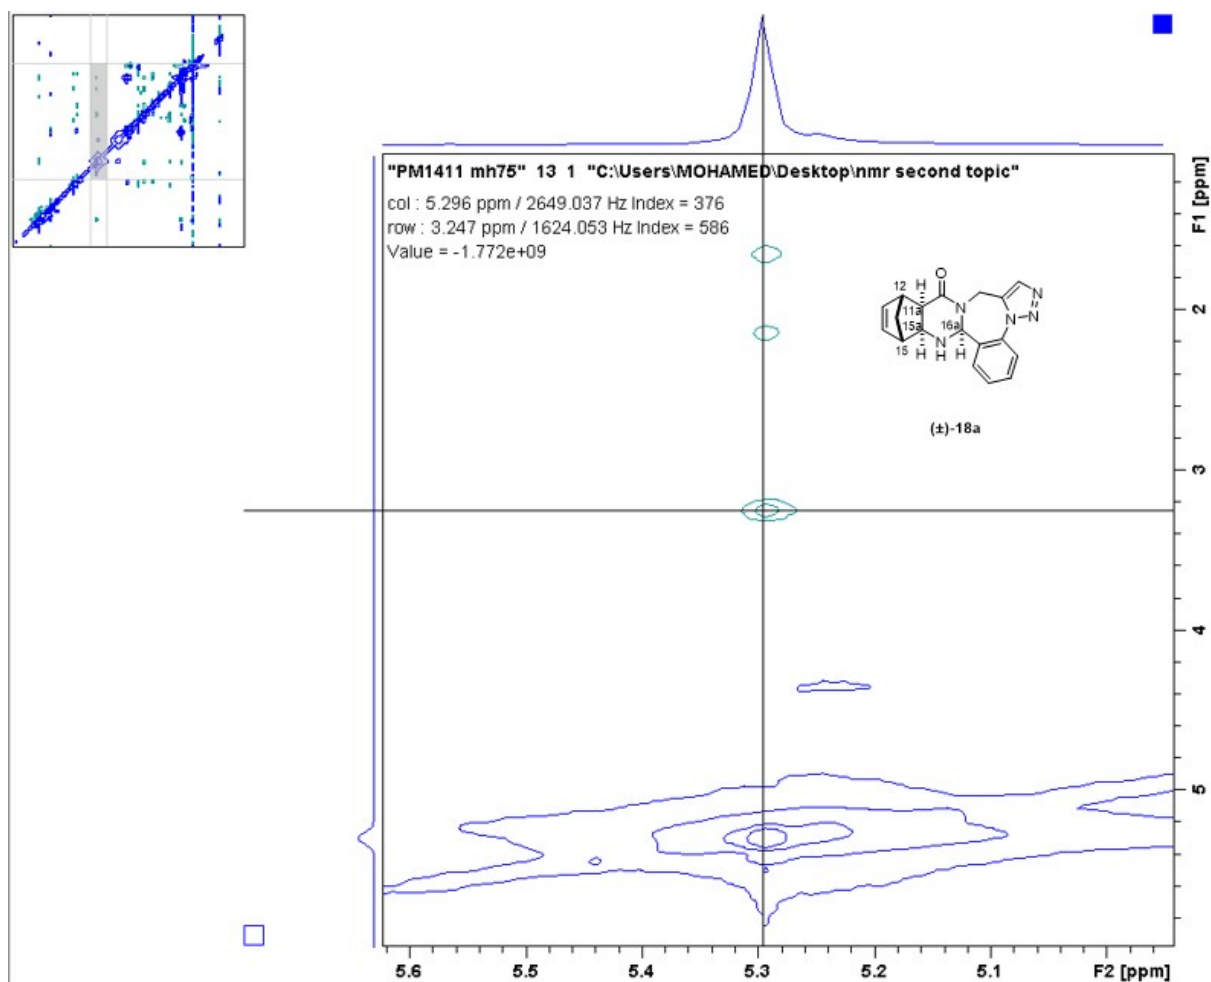

NOESY NMR Spectrum of (*r*-11a,*c*-12,*c*-15,*c*-15a,*c*-16a)-11a,12,15,15a,16,16a-hexahydro-12,15 methanobenzo[5,6][1,2,3]triazolo[5',1':3,4][1,4]diazepino[7,1-*b*]-quinazolin-11(9*H*)-one **18a** (CDCl<sub>3</sub>)

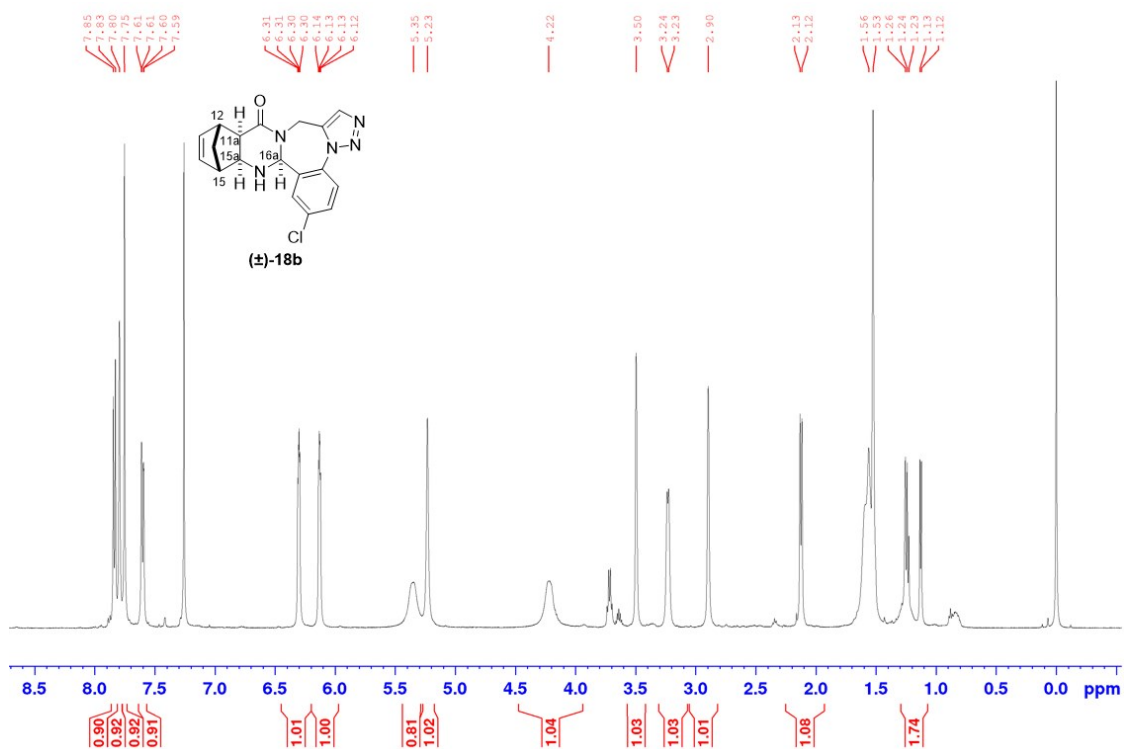

$^1\text{H}$  NMR Spectrum of (*r*-11a,*c*-12,*c*-15,*c*-15a,*c*-16a)-2-chloro-11a,12,15,15a,16,16a-hexa-hydro-12,15-methanobenzo[5,6][1,2,3]triazolo-[5',1':3,4][1,4]-diazepino[7,1-*b*]quinazolin-11(9*H*)-one (**±**)-**18b** ( $\text{CDCl}_3$ )

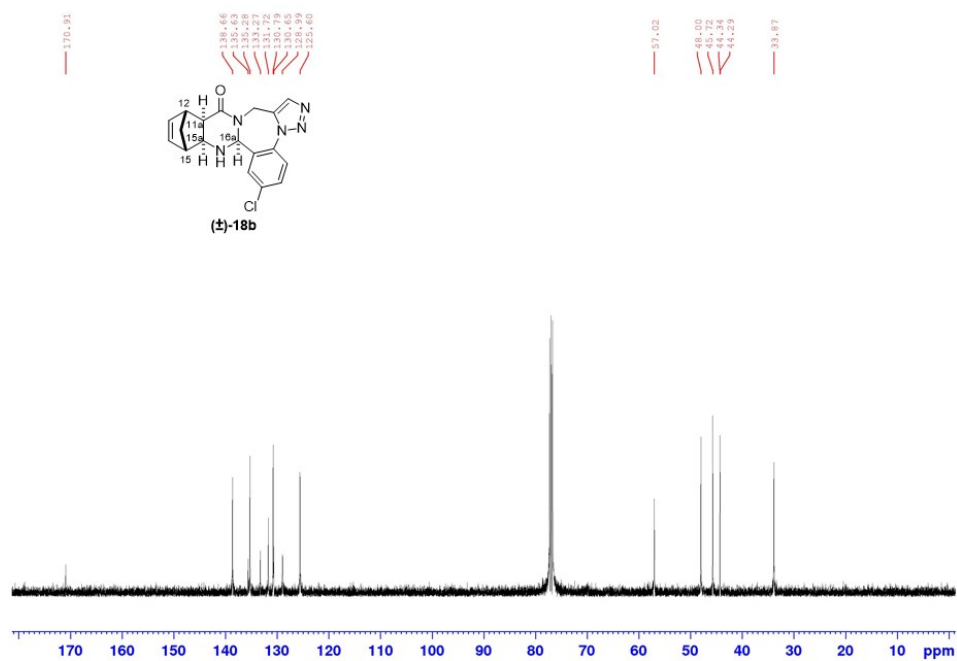

$^{13}\text{C}$  NMR Spectrum of (*r*-11a,*c*-12,*c*-15,*c*-15a,*c*-16a)-2-chloro-11a,12,15,15a,16,16a-hexa-hydro-12,15-methanobenzo[5,6][1,2,3]triazolo-[5',1':3,4][1,4]-diazepino[7,1-*b*]quinazolin-11(9*H*)-one (**±**)-**18b** ( $\text{CDCl}_3$ )

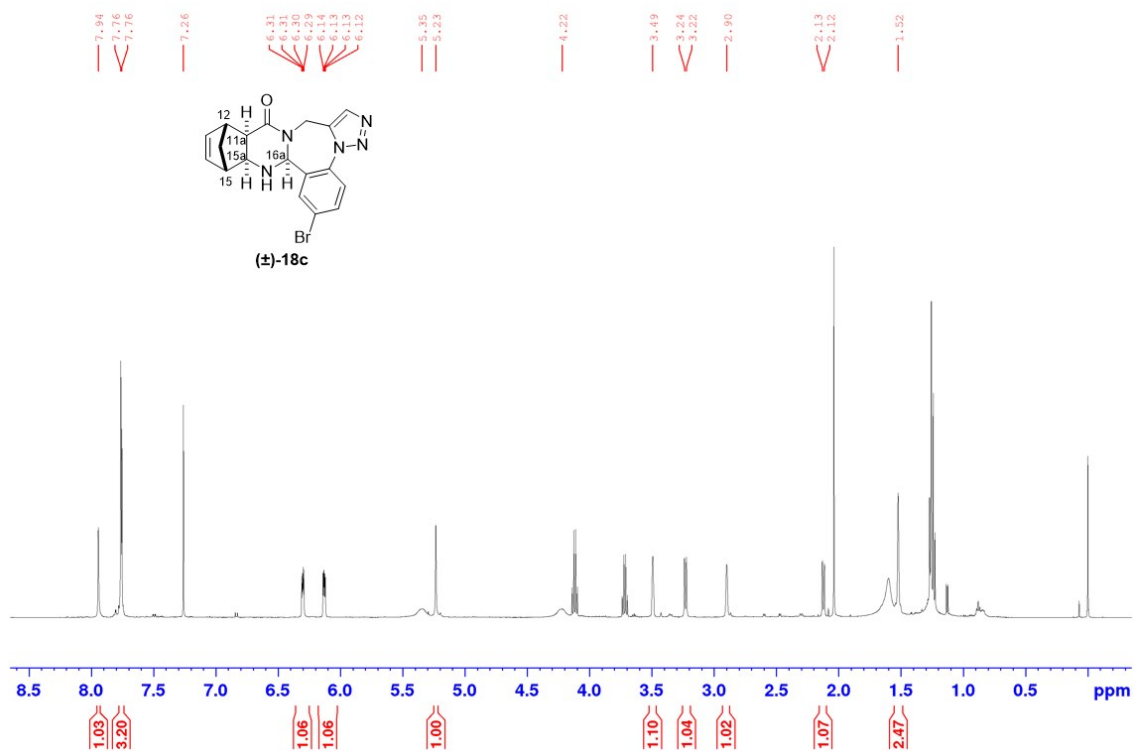

<sup>1</sup>H NMR Spectrum of (*r*-11a,*c*-12,*c*-15,*c*-15a,*c*-16a)-2-bromo-11a,12,15,15a,16,16a-hexahydro-12,15-methanobenzo[5,6][1,2,3]triazolo[5',1':3,4][1,4]-diazepino[7,1-*b*]quinazolin-11(*9H*)-one (**±**)-**18c** (CDCl<sub>3</sub>)

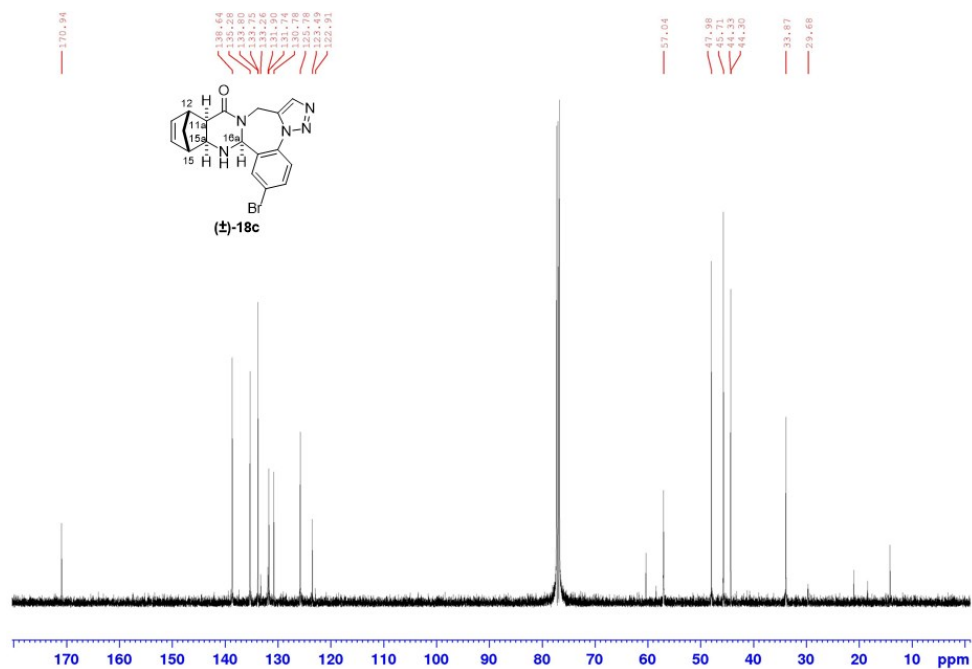

<sup>13</sup>C NMR Spectrum of (*r*-11a,*c*-12,*c*-15,*c*-15a,*c*-16a)-2-bromo-11a,12,15,15a,16,16a-hexahydro-12,15-methanobenzo[5,6][1,2,3]triazolo[5',1':3,4][1,4]-diazepino[7,1-*b*]quinazolin-11(*9H*)-one (**±**)-**18c** (CDCl<sub>3</sub>)

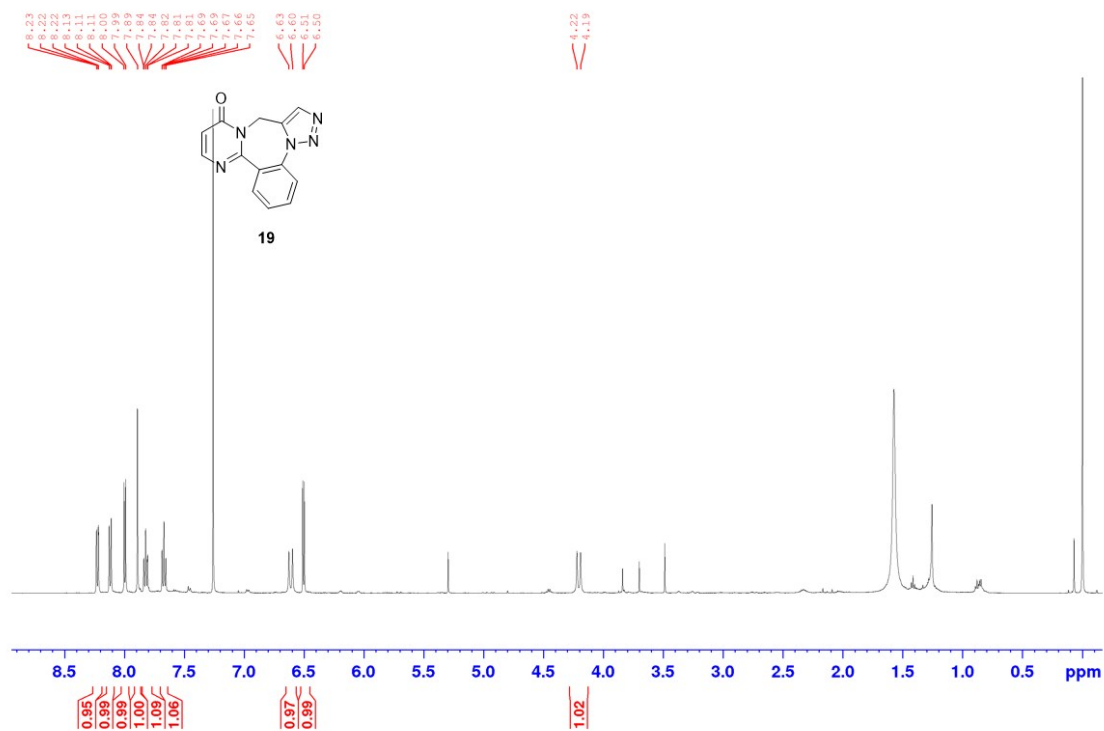

<sup>1</sup>H NMR Spectrum of 9H-benzo[*f*]pyrimido[1,2-*d*][1,2,3]triazolo[1,5-*a*][1,4]diazepin-11-one **19** (CDCl<sub>3</sub>)

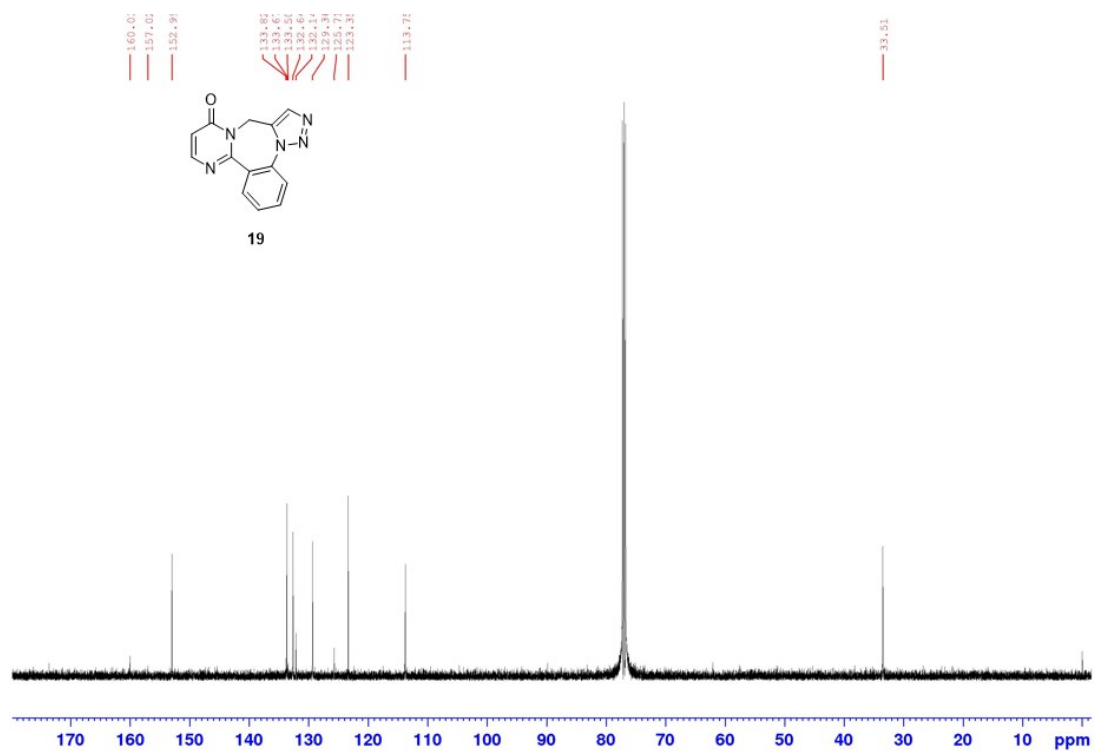

<sup>13</sup>C NMR Spectrum of 9H-benzo[*f*]pyrimido[1,2-*d*][1,2,3]triazolo[1,5-*a*][1,4]diazepin-11-one **19** (CDCl<sub>3</sub>)

#### 4. HPLC chromatograms of domino products ( $\pm$ )-17a, (+)-17a and (-)-17a

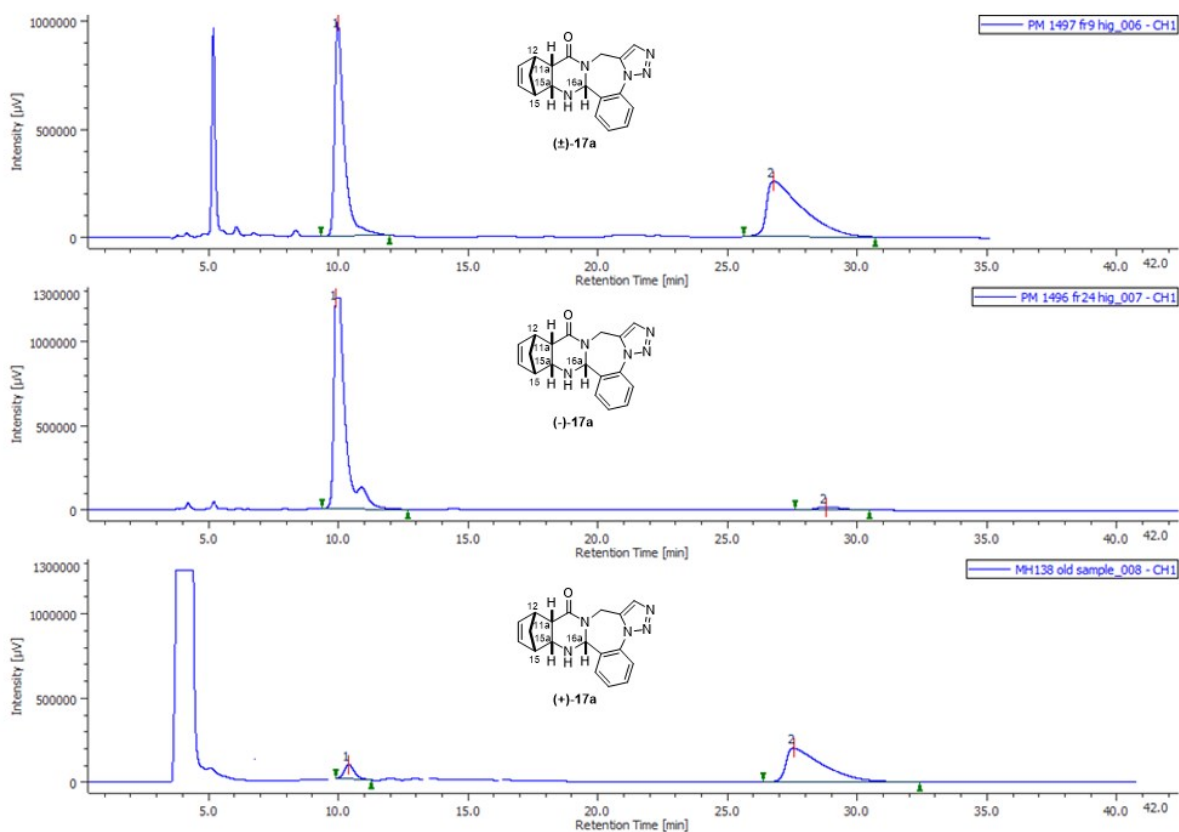

Chromatograms of racemic ( $\pm$ )-17a and enantiomeric domino products (+)-17a and (-)-17a determined by HPLC using Phenomenex-IA column [eluent: a mixture of *n*-hexane and IPA (60:40), flow rate: 0.5 mL·min<sup>-1</sup>, detection by PDA detector, retention times (-)-17a: 9.98 min, (+)-17a: 28.77 min].

## 5. X-ray crystallography data for (±)-5a, (±)-6a and (±)-17c

**Table 1.** Crystal Data.

|                                        | (±)-5a                                           | (±)-6a                                           | (±)-17c                                            |
|----------------------------------------|--------------------------------------------------|--------------------------------------------------|----------------------------------------------------|
| empirical formula                      | C <sub>17</sub> H <sub>19</sub> N <sub>5</sub> O | C <sub>17</sub> H <sub>19</sub> N <sub>5</sub> O | C <sub>18</sub> H <sub>16</sub> BrN <sub>5</sub> O |
| fw                                     | 309.37                                           | 309.37                                           | 398.27                                             |
| temp (K)                               | 120(2)                                           | 120(2)                                           | 120(2)                                             |
| λ(Å)                                   | 1.54184 Å                                        | 1.54184                                          | 1.54184                                            |
| cryst syst                             | Monoclinic                                       | Monoclinic                                       | Monoclinic                                         |
| space group                            | P2 <sub>1</sub> /c                               | P2 <sub>1</sub> /c                               | C2/c                                               |
| a (Å)                                  | 11.5093(2)                                       | 10.95560(10)                                     | 21.0136(3)                                         |
| b (Å)                                  | 13.0753(2)                                       | 8.17340(10)                                      | 8.39870(10)                                        |
| c (Å)                                  | 10.9809(2)                                       | 16.6676(2)                                       | 18.1668(3)                                         |
| β (deg)                                | 112.310(2)                                       | 98.8760(10)                                      | 100.948(2)                                         |
| V (Å <sup>3</sup> )                    | 1528.79(5)                                       | 1474.62(3)                                       | 3147.85(8)                                         |
| Z                                      | 4                                                | 4                                                | 8                                                  |
| ρ <sub>calc</sub> (Mg/m <sup>3</sup> ) | 1.344                                            | 1.394                                            | 1.681                                              |
| μ(Mo Kα) (mm <sup>-1</sup> )           | 0.709                                            | 0.735                                            | 3.710                                              |
| No. reflns.                            | 16866                                            | 20283                                            | 12301                                              |
| Unique reflns.                         | 3225                                             | 3120                                             | 3290                                               |
| GOOF (F <sup>2</sup> )                 | 1.041                                            | 1.059                                            | 1.047                                              |
| R <sub>int</sub>                       | 0.0263                                           | 0.0184                                           | 0.0205                                             |
| R1 <sup>a</sup> (I ≥ 2σ)               | 0.0356                                           | 0.0350                                           | 0.0216                                             |
| wR2 <sup>b</sup> (I ≥ 2σ)              | 0.0935                                           | 0.0900                                           | 0.0557                                             |

$$^a R1 = \sum ||F_o| - |F_c|| / \sum |F_o|. \quad ^b wR2 = [\sum [w(F_o^2 - F_c^2)^2] / \sum [w(F_o^2)^2]]^{1/2}.$$



## 6. Copies of HRMS-ESI Spectra

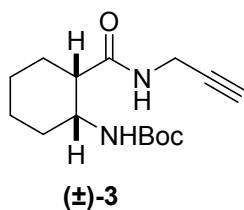

### tert-Butyl (cis-2-(prop-2-yn-1-ylcarbamoyl)cyclohexyl)carbamate (±)-3:

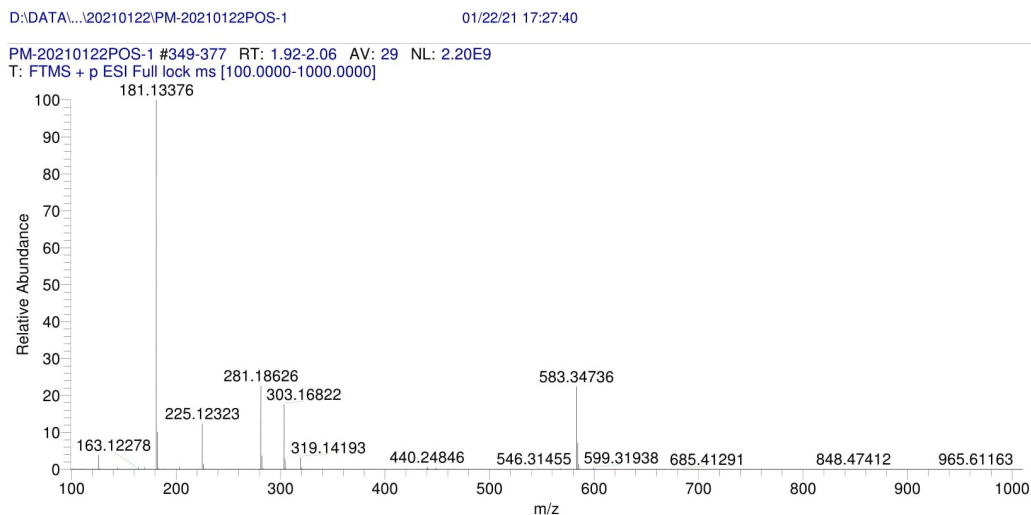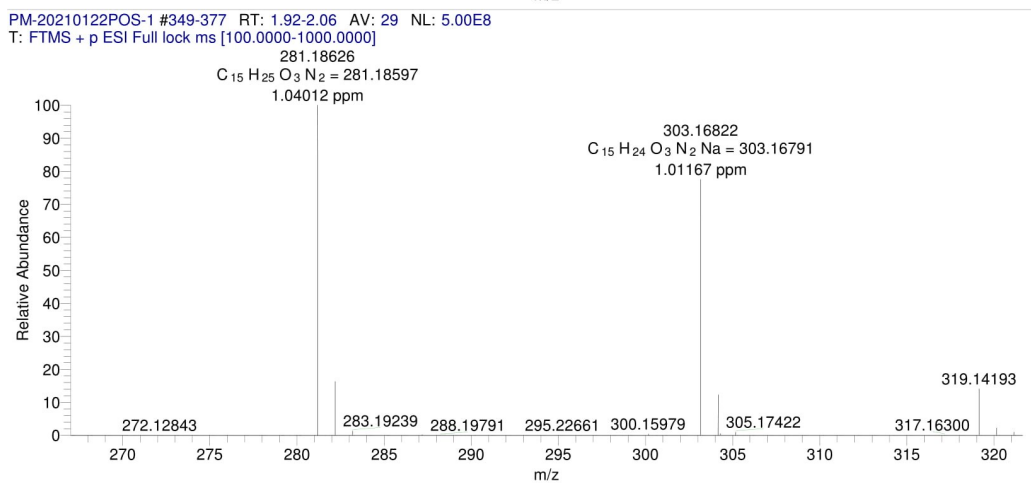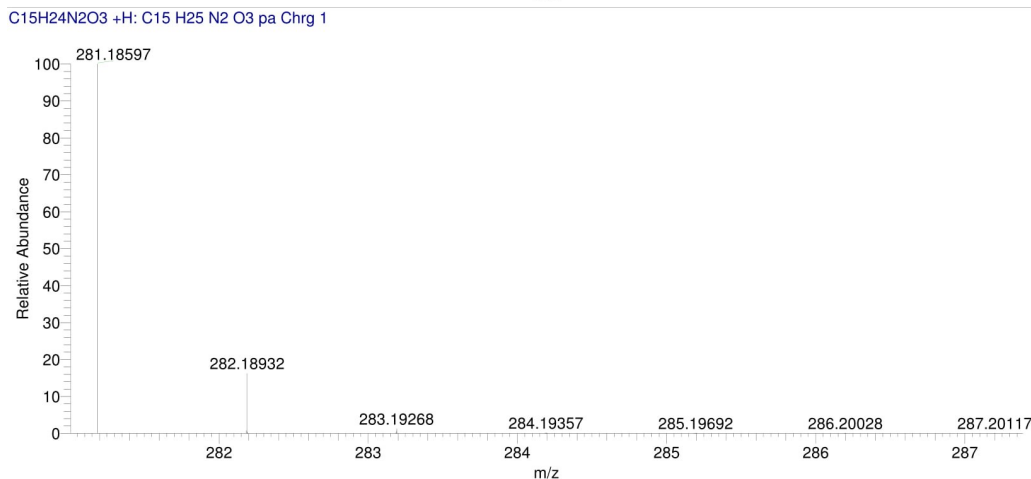

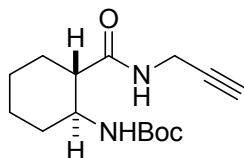

(±)-4

**tert-Butyl (trans-2-(prop-2-yn-1-ylcarbamoyl)cyclohexyl)carbamate (±)-4:**

D:\DATA\...20210122\PM-20210122POS-1

01/22/21 17:27:40

PM-20210122POS-1 #944-972 RT: 5.12-5.27 AV: 29 NL: 1.20E9

T: FTMS + p ESI Full ms [100.0000-1000.0000]

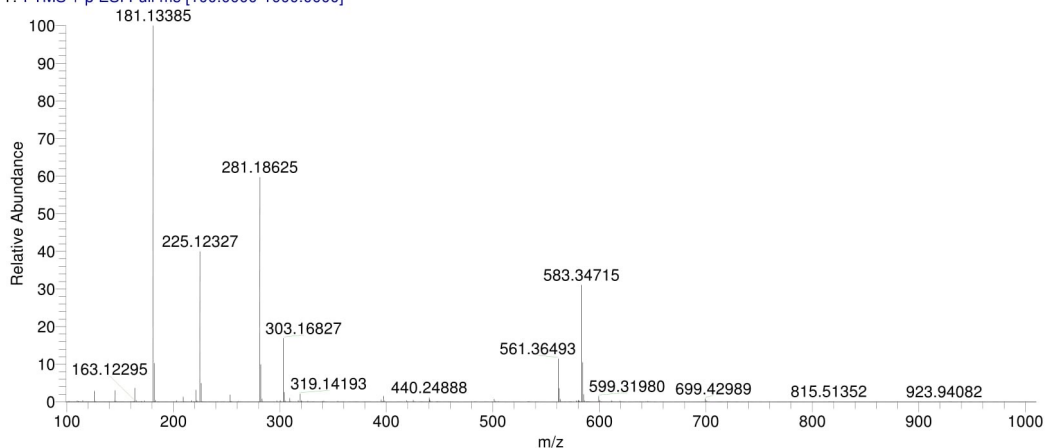

PM-20210122POS-1 #944-972 RT: 5.12-5.27 AV: 29 NL: 7.18E8

T: FTMS + p ESI Full ms [100.0000-1000.0000]

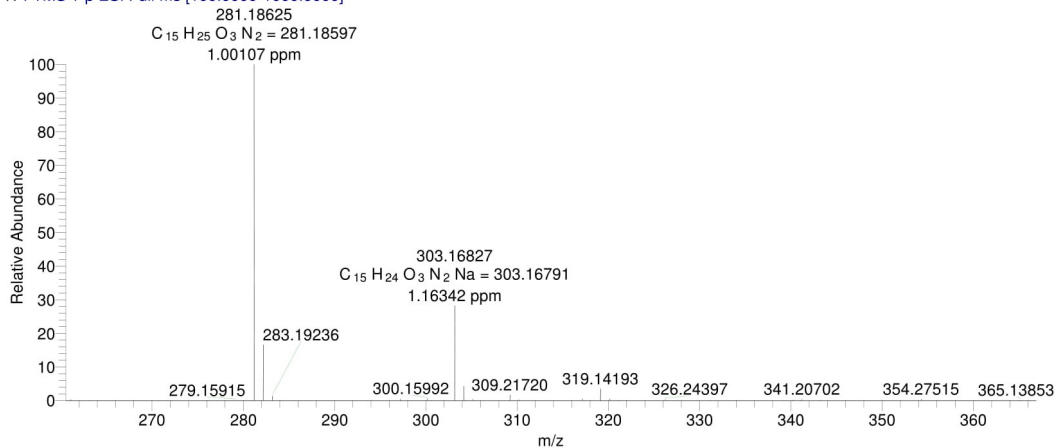

C15H24N2O3 +H: C15 H25 N2 O3 pa Chrg 1

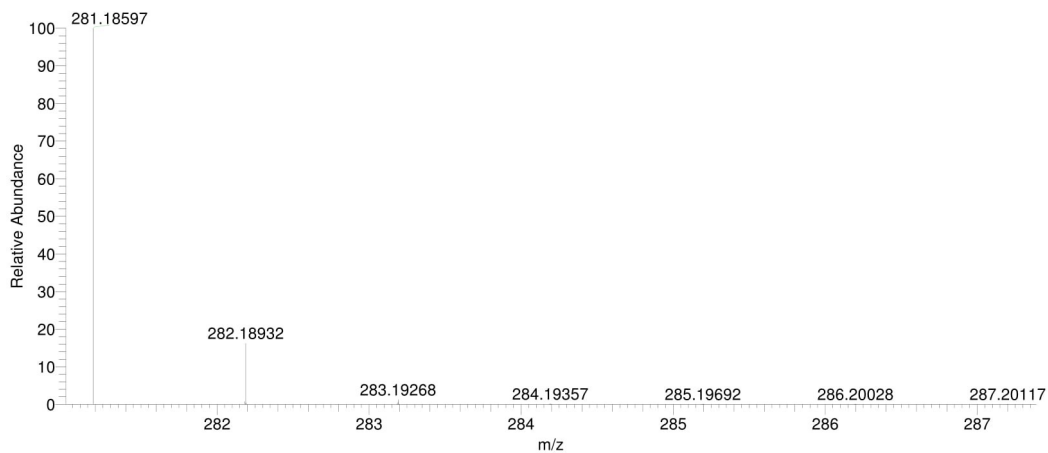

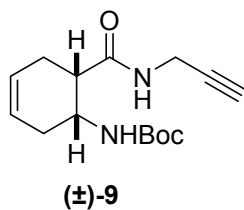

**tert-Butyl (cis-6-(prop-2-yn-1-ylcarbamoyl)cyclohex-3-en-1-yl)carbamate (±)-9:**

D:\DATA\...20210122\PM-20210122POS-1

01/22/21 17:27:40

PM-20210122POS-1 #1967-2022 RT: 10.76-11.04 AV: 56 NL: 6.92E8

T: FTMS + p ESI Full ms [100.0000-1000.0000]

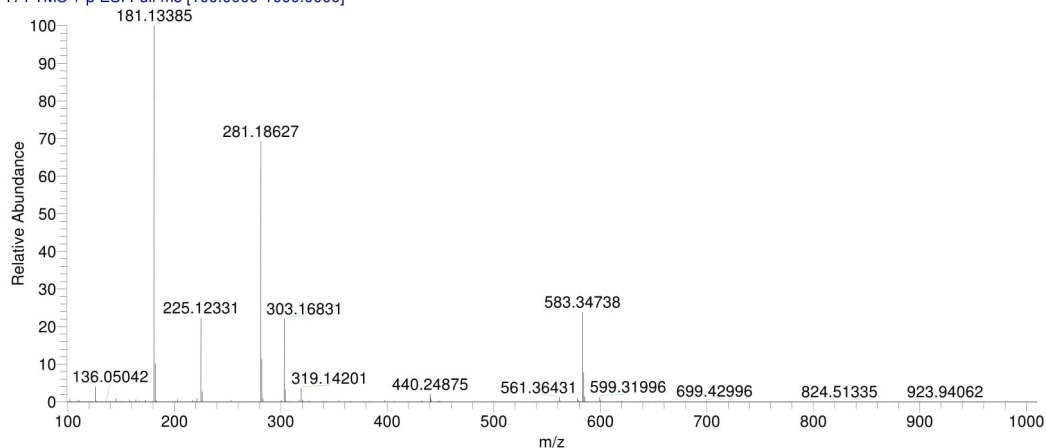

PM-20210122POS-1 #1967-2022 RT: 10.76-11.04 AV: 56 NL: 4.79E8

T: FTMS + p ESI Full ms [100.0000-1000.0000]

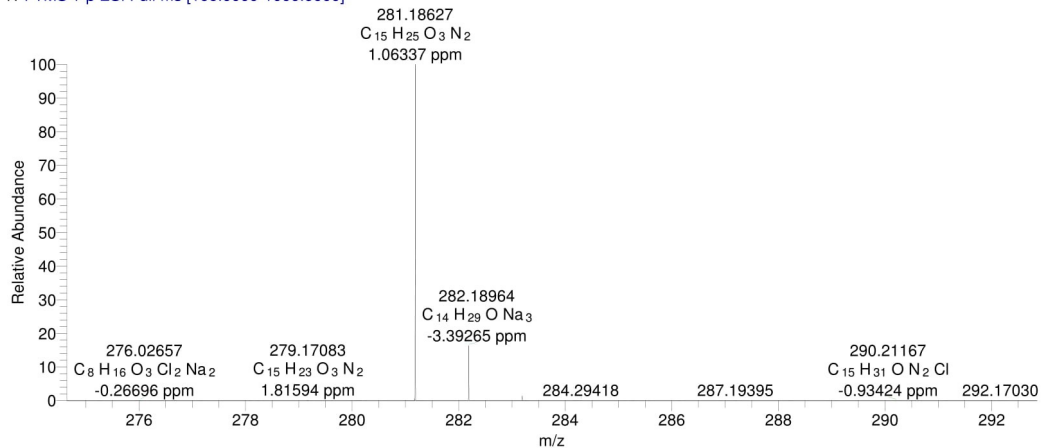

C15H22N2O3 +H: C15 H23 N2 O3 pa Chrg 1

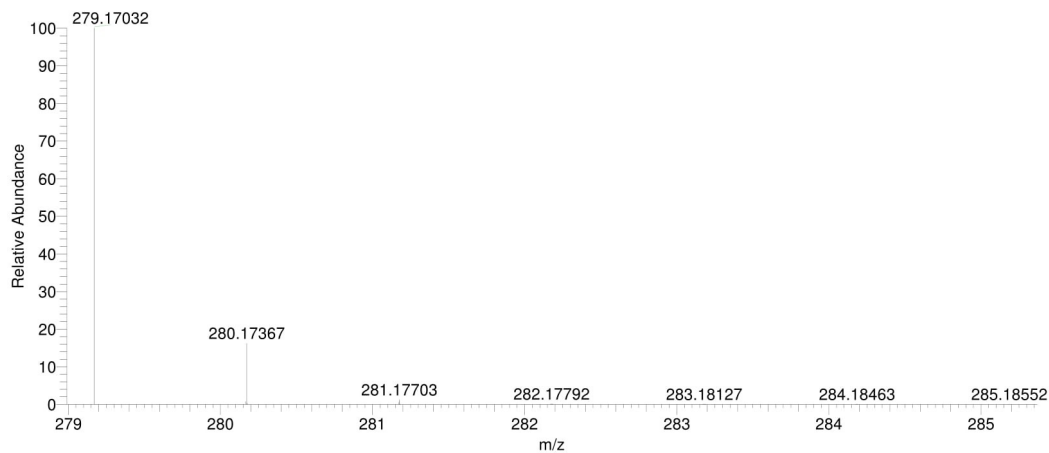

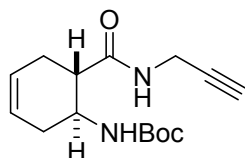

(±)-10

**tert-Butyl (trans-6-(prop-2-yn-1-ylcarbamoyl)cyclohex-3-en-1-yl)carbamate (±)-10:**

D:\DATA\...20210122\PM-20210122POS-1

01/22/21 17:27:40

PM-20210122POS-1 #1387-1436 RT: 7.54-7.79 AV: 50 NL: 3.79E8

T: FTMS + p ESI Full ms [100.0000-1000.0000]

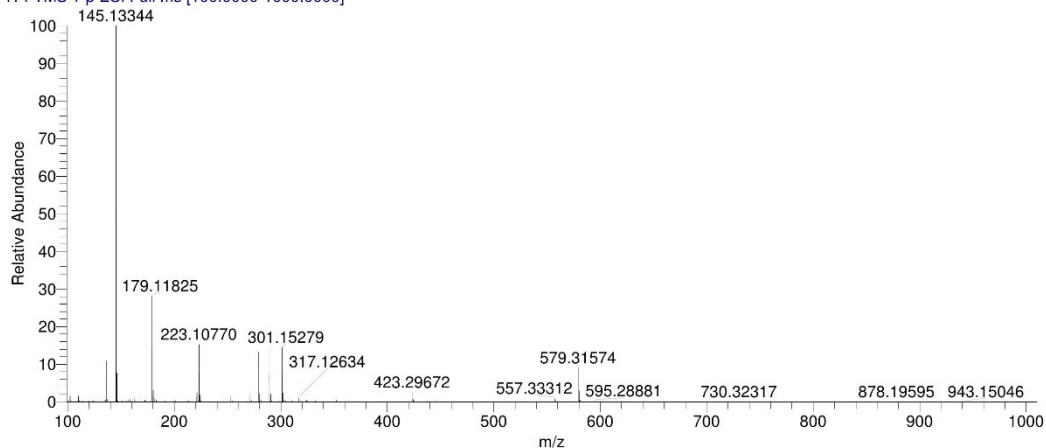

PM-20210122POS-1 #1387-1436 RT: 7.54-7.79 AV: 50 NL: 5.49E7

T: FTMS + p ESI Full ms [100.0000-1000.0000]

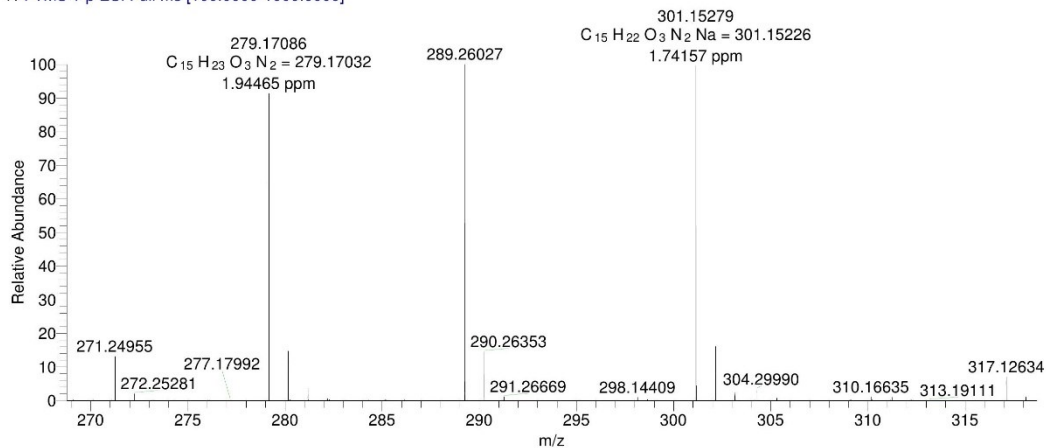

C15H22N2O3 +H: C15 H23 N2 O3 pa Chrg 1

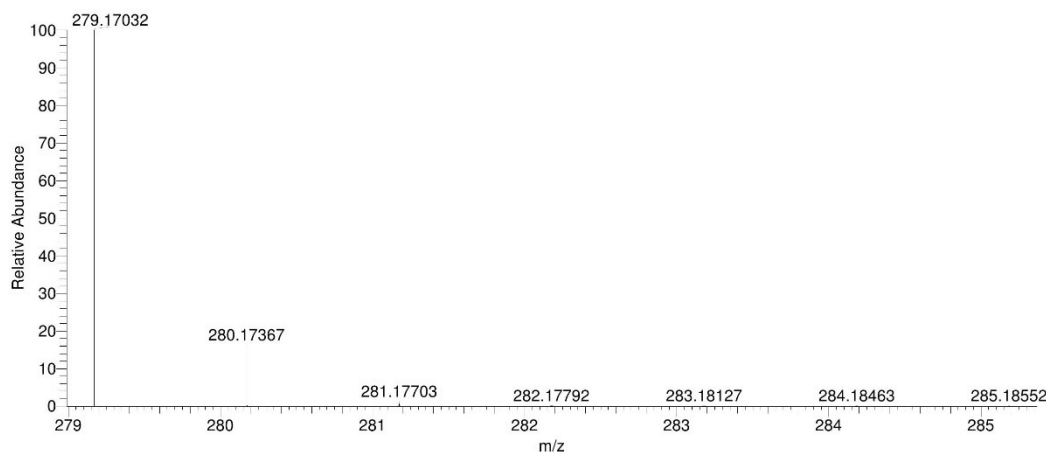

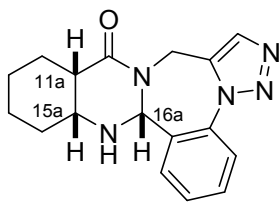

(±)-5a

(*r*-11a,*c*-15a,*c*-16a)-11a,12,13,14,15,15a,16,16a-

Octahydrobenzo[5,6][1,2,3]triazolo[5',1':3,4][1,4]diazepino[7,1-*b*]quinazolin-11(9*H*)-one (±)-5a:

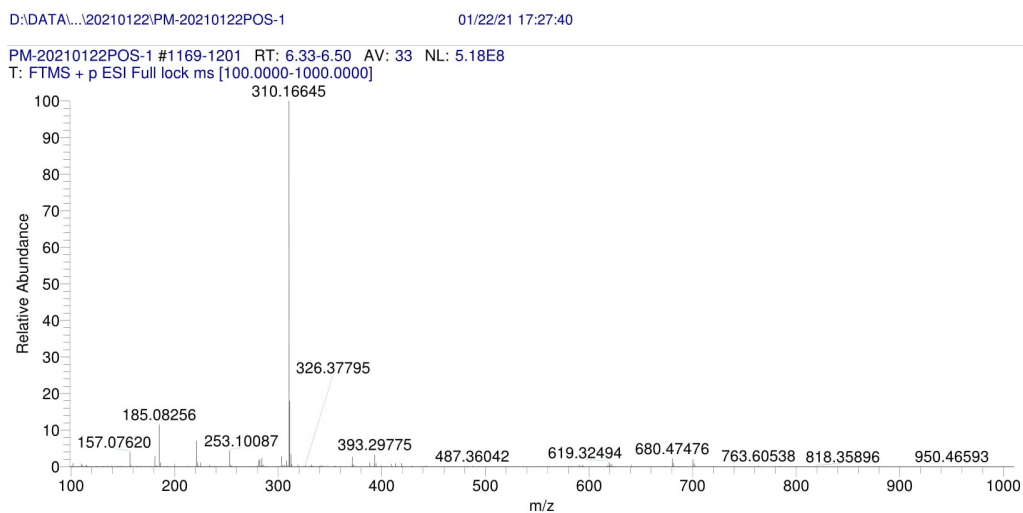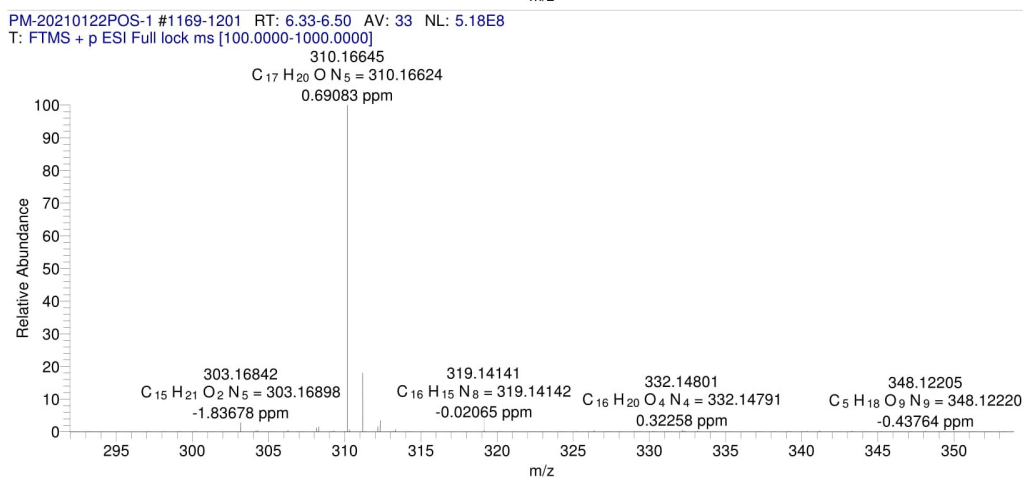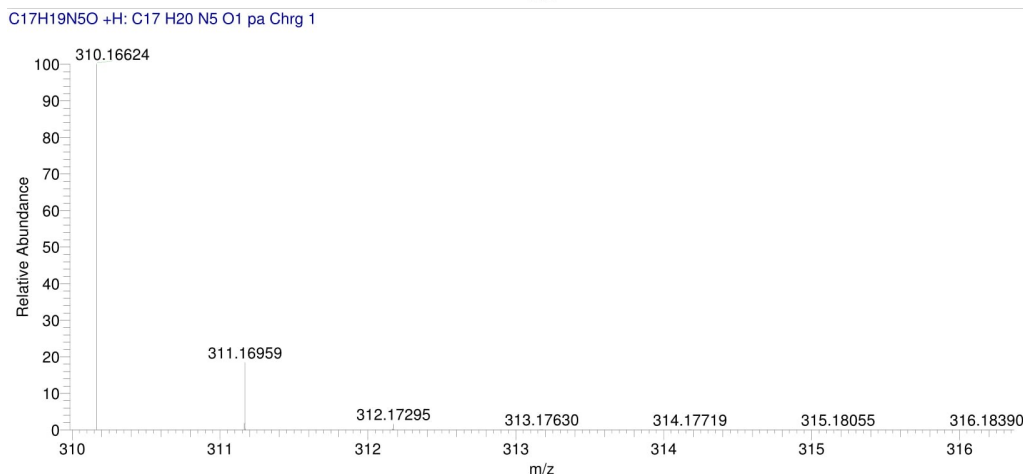

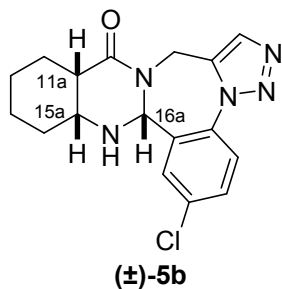

**(*r*-11a,*c*-15a,*c*-16a)-2-Chloro-11a,12,13,14,15,15a,16,16a-octahydrobenzo[5,6][1,2,3]triazolo[5',1':3,4][1,4]diazepino[7,1-*b*]quinazolin-11(9*H*)-one (±)-5b:**

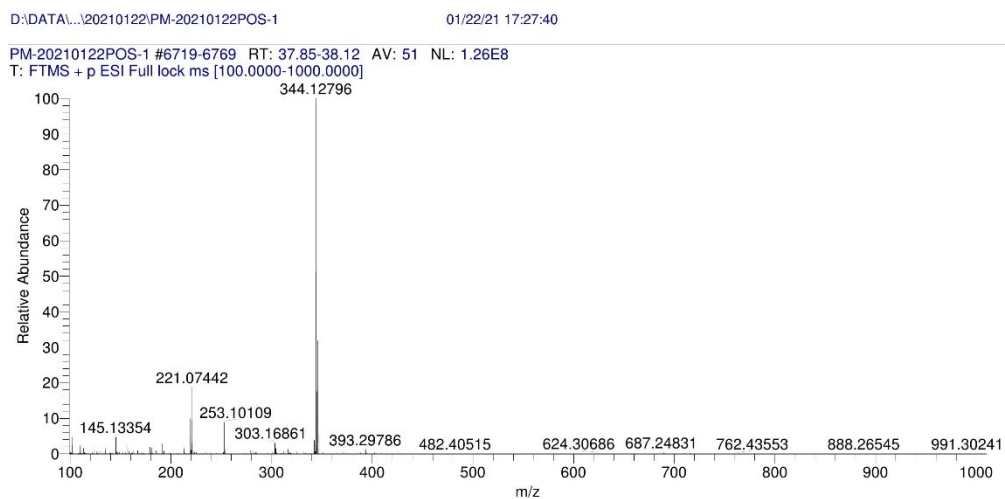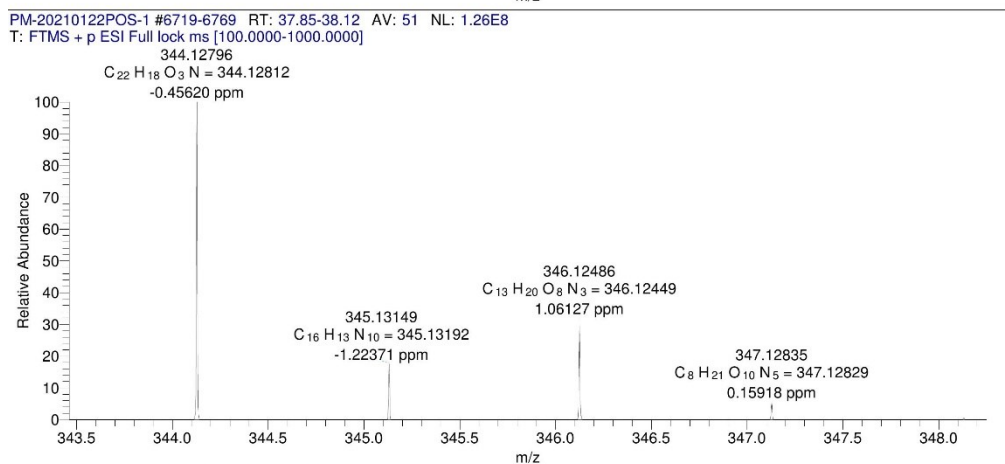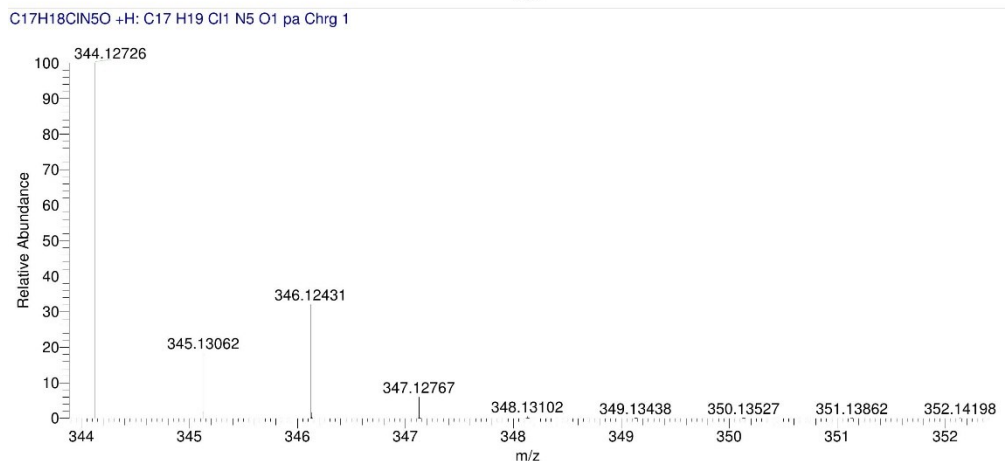

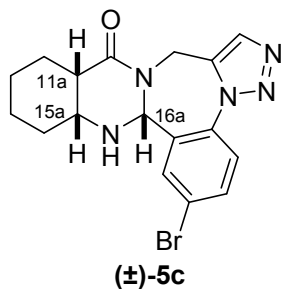

**(*r*-11a,*c*-15a,*c*-16a)-2-Bromo-11a,12,13,14,15,15a,16,16a-octahydrobenzo[5,6][1,2,3]triazolo[5',1':3,4][1,4]diazepino[7,1-*b*]quinazolin-11(9*H*)-one (±)-5c:**

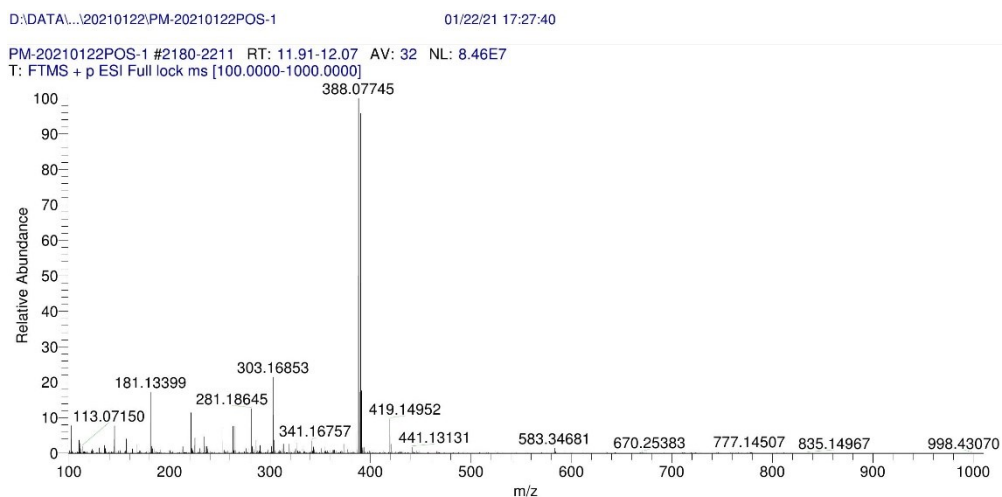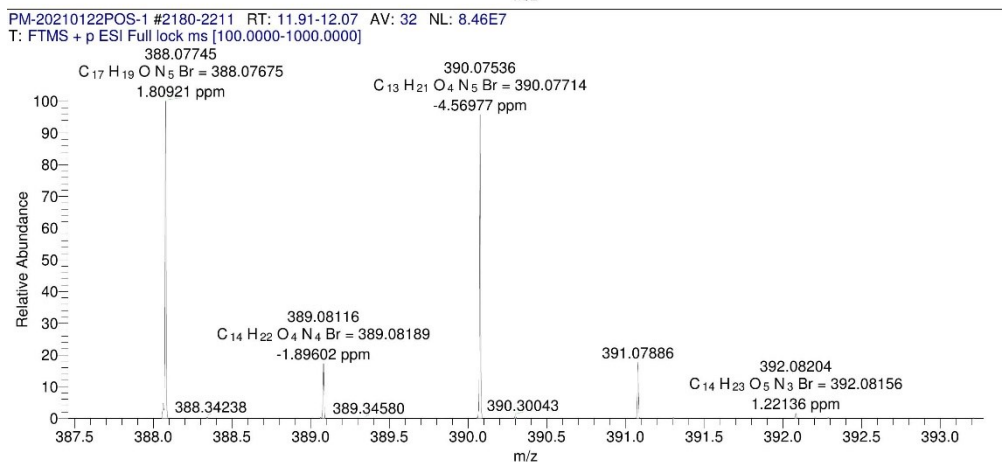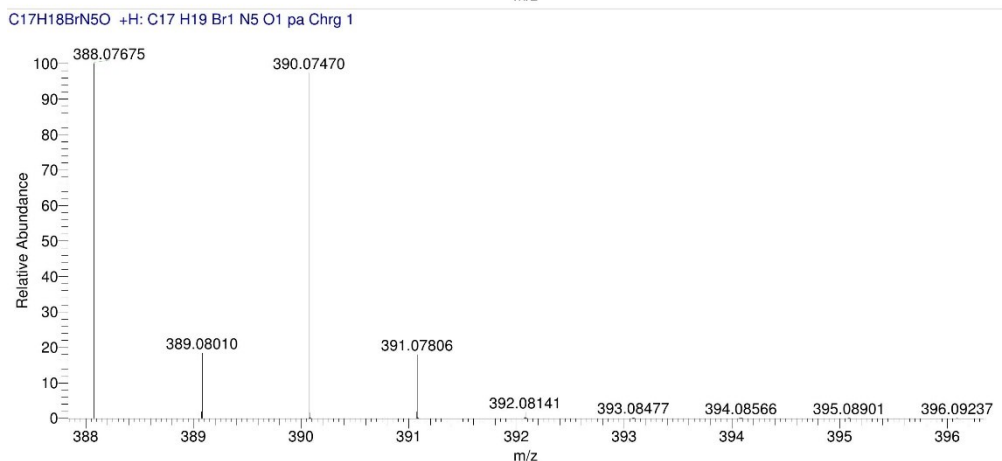

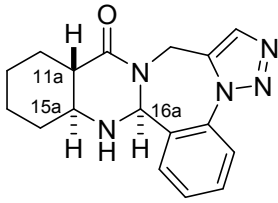

(±)-6a

(*r*-11a,*t*-15a,*t*-16a)-11a,12,13,14,15,15a,16,16a-

Octahydrobenzo[5,6][1,2,3]triazolo[5',1':3,4][1,4]diazepino[7,1-*b*]quinazolin-11(9*H*)-one (±)-6a:

D:\DATA\...20210122\PM-20210122POS-1

01/22/21 17:27:40

PM-20210122POS-1 #2421-2470 RT: 13.25-13.50 AV: 50 NL: 4.13E8  
T: FTMS + p ESI Full lock ms [100.0000-1000.0000]

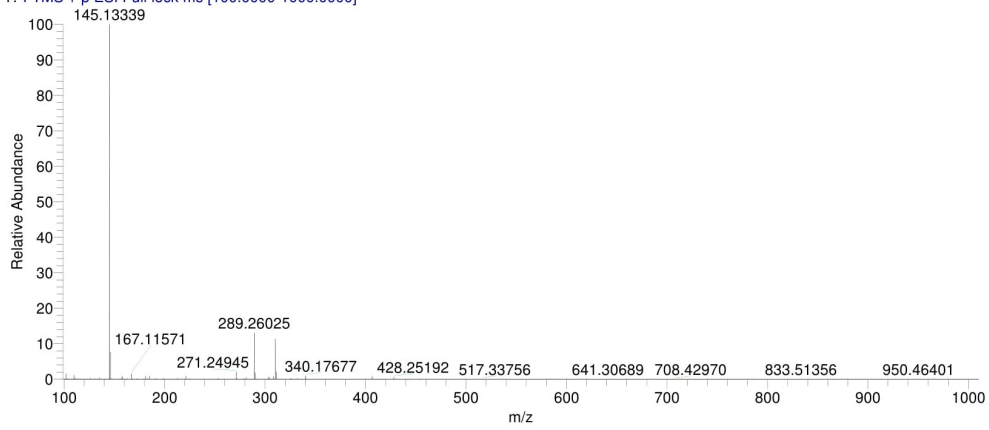

PM-20210122POS-1 #2421-2470 RT: 13.25-13.50 AV: 50 NL: 4.68E7

T: FTMS + p ESI Full lock ms [100.0000-1000.0000]

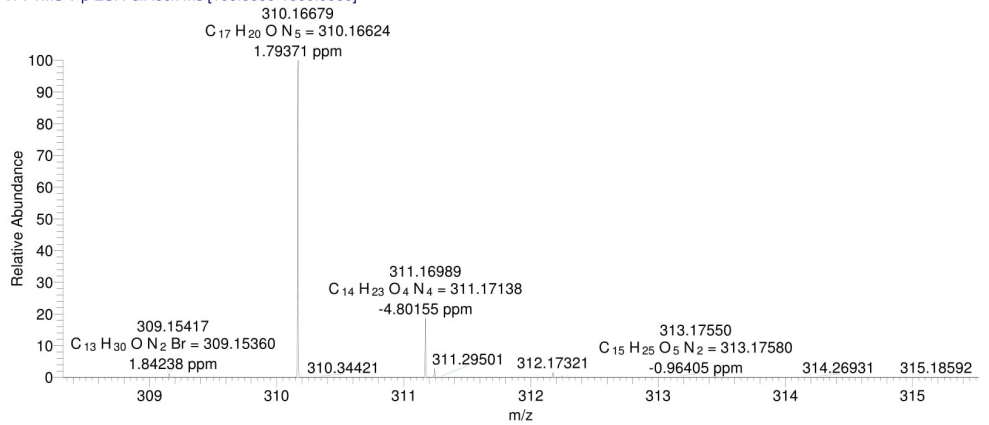

C17H19N5O +H: C17 H20 N5 O1 pa Chrg 1

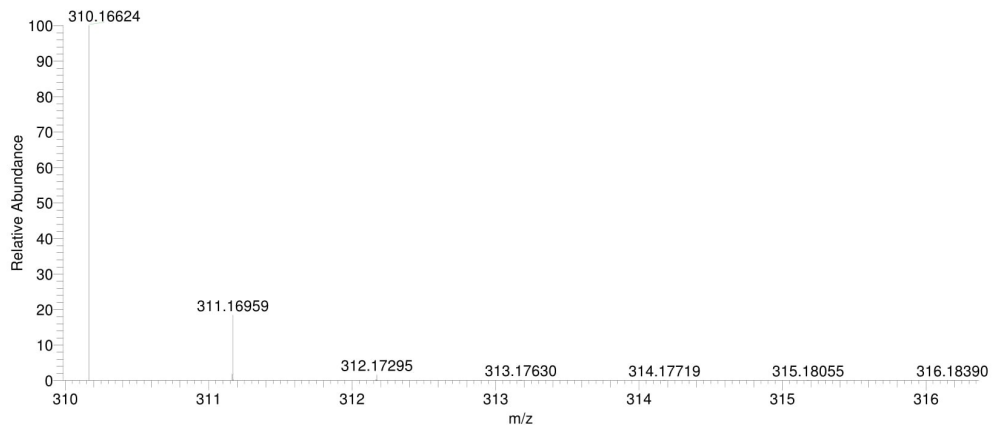



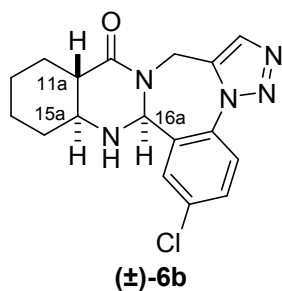

**(*r*-11a,*t*-15a,*t*-16a)-2-Chloro-11a,12,13,14,15,15a,16,16a-octahydrobenzo[5,6][1,2,3]triazolo[5',1':3,4][1,4]diazepino[7,1-*b*]quinazolin-11(9*H*)-one (±)-6b:**

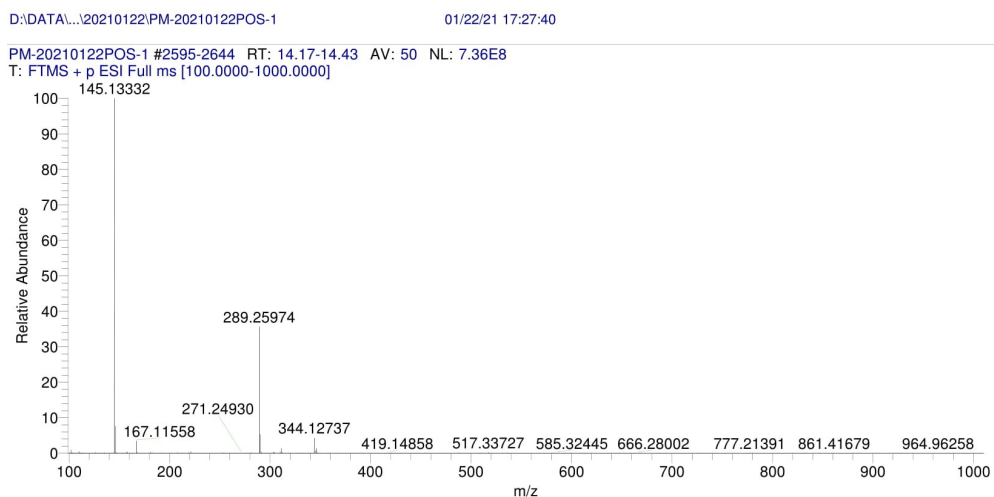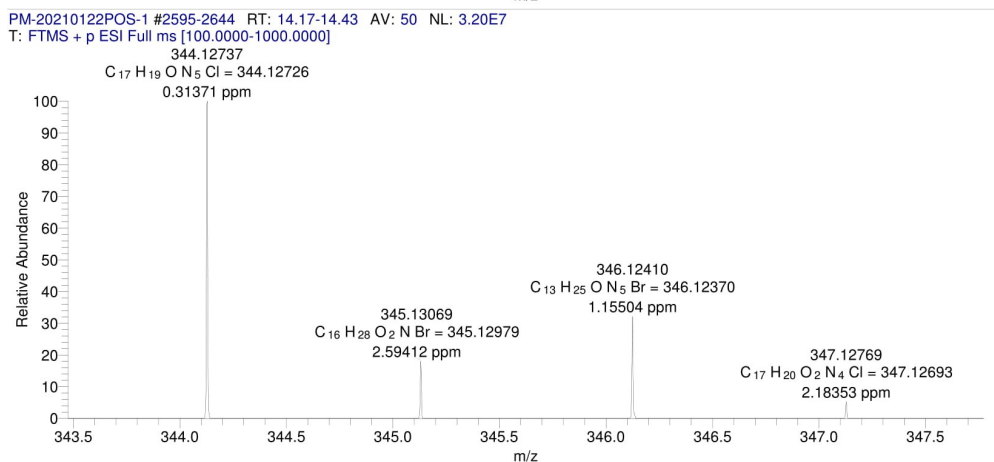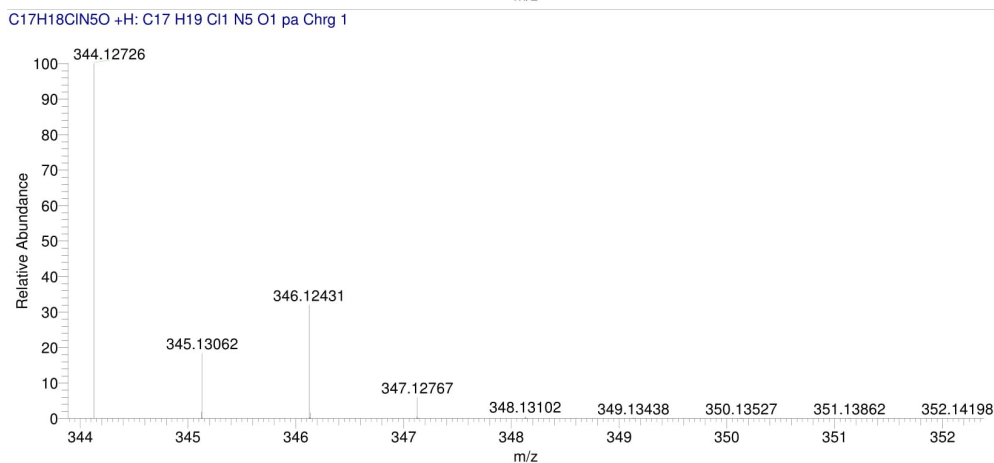

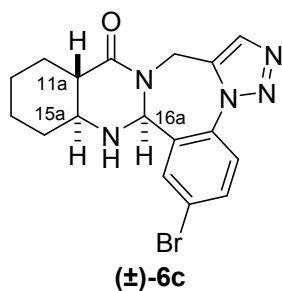

**(*r*-11a,*t*-15a,*t*-16a)-2-Bromo-11a,12,13,14,15,15a,16,16a-octahydrobenzo[5,6][1,2,3]triazolo[5',1':3,4][1,4]diazepino[7,1-*b*]quinazolin-11(9*H*)-one (±)-6c:**

D:\DATA\...20210122\PM-20210122POS-1

01/22/21 17:27:40

PM-20210122POS-1 #2851-2888 RT: 15.58-15.77 AV: 38 NL: 9.20E8  
T: FTMS + p ESI Full lock ms [100.0000-1000.0000]

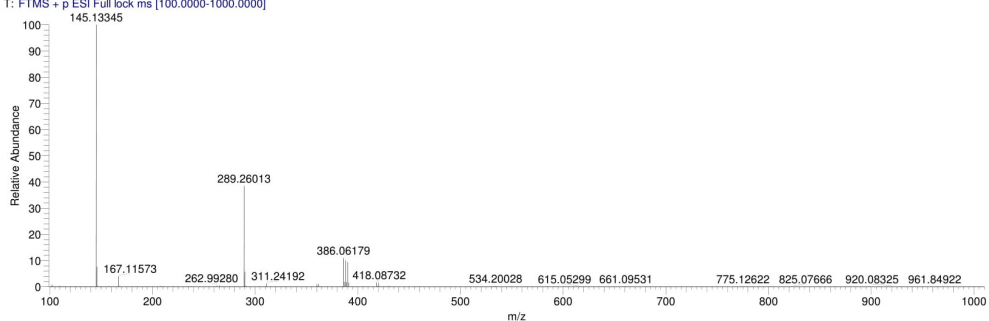

PM-20210122POS-1 #2851-2888 RT: 15.58-15.77 AV: 38 NL: 1.01E8  
T: FTMS + p ESI Full lock ms [100.0000-1000.0000]

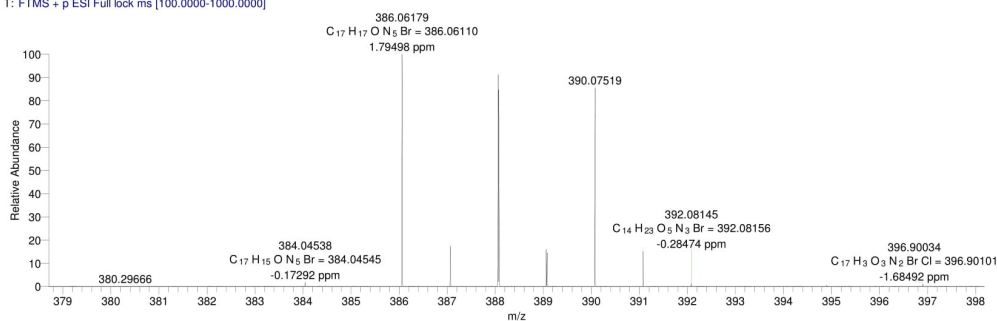

PM-20210122POS-1 #2851-2888 RT: 15.58-15.77 AV: 38 NL: 9.25E7  
T: FTMS + p ESI Full lock ms [100.0000-1000.0000]

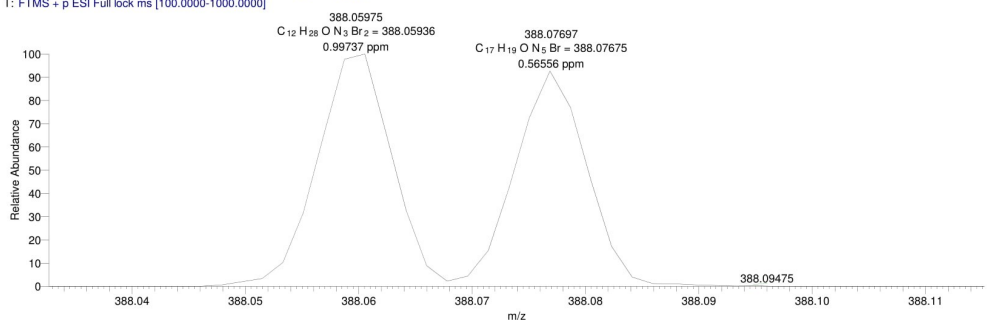

C17H18BrN5O +H: C17 H19 Br1 N5 O1 pa Chrg 1

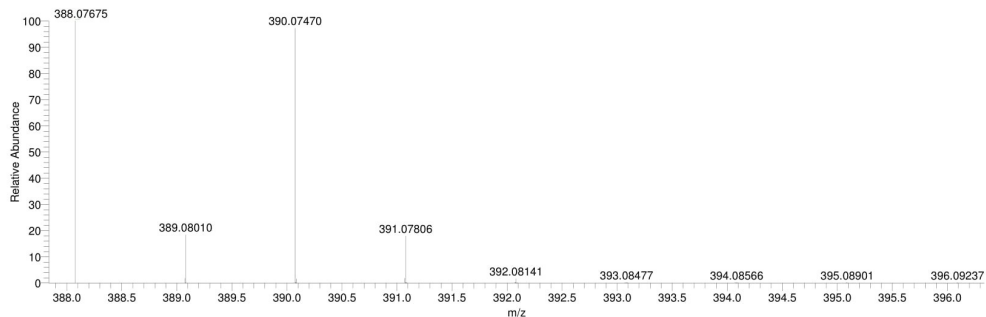

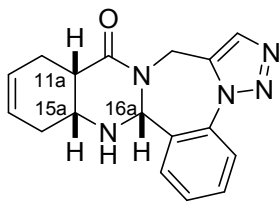

(±)-11a

(*r*-11a,*c*-15a,*c*-16a)-11a,12,15,15a,16,16a-

Hexahydrobenzo[5,6][1,2,3]triazolo[5',1':3,4][1,4]diazepino[7,1-*b*]quinazolin-11(9*H*)-one (±)-11a:

D:\DATA\...20210122\PM-20210122POS-1

01/22/21 17:27:40

PM-20210122POS-1 #3078-3104 RT: 16.84-16.98 AV: 27 NL: 2.48E8  
T: FTMS + p ESI Full lock ms [100.0000-1000.0000]

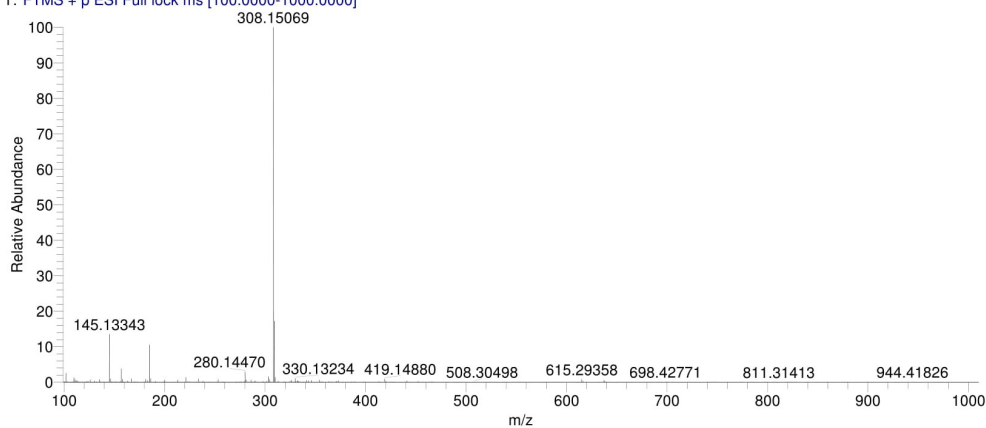

PM-20210122POS-1 #3078-3104 RT: 16.84-16.98 AV: 27 NL: 2.48E8  
T: FTMS + p ESI Full lock ms [100.0000-1000.0000]

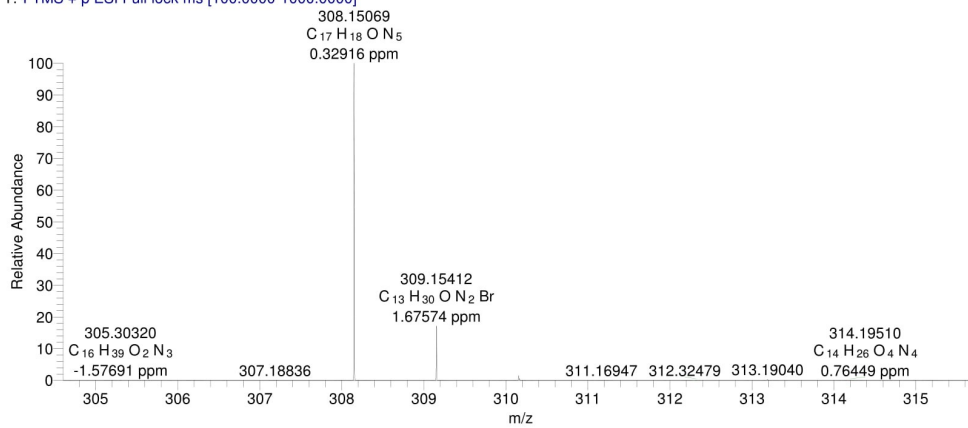

C17H17N5O +H: C17 H18 N5 O1 pa Chrg 1

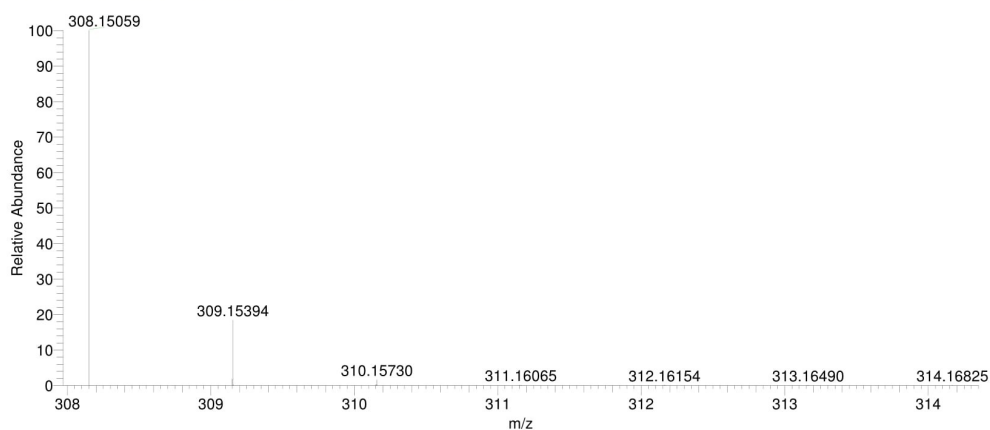

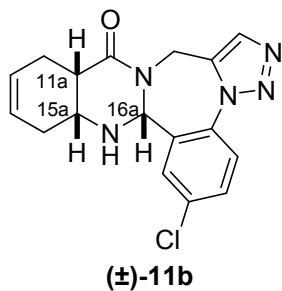

**(*r*-11a,*c*-15a,*c*-16a)-2-Chloro-11a,12,15,15a,16,16a-hexahydrobenzo[5,6][1,2,3]triazolo[5',1':3,4][1,4]diazepino[7,1-*b*]quinazolin-11(9*H*)-one (±)-11b:**

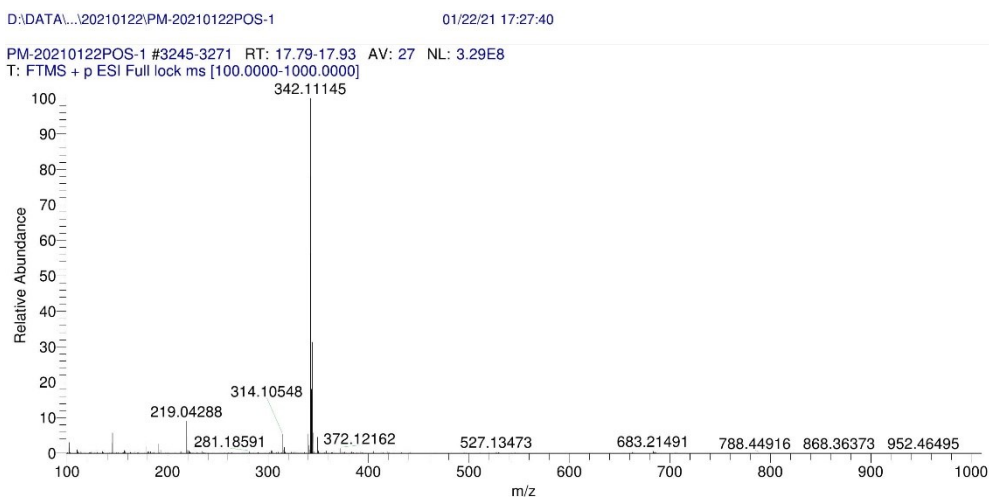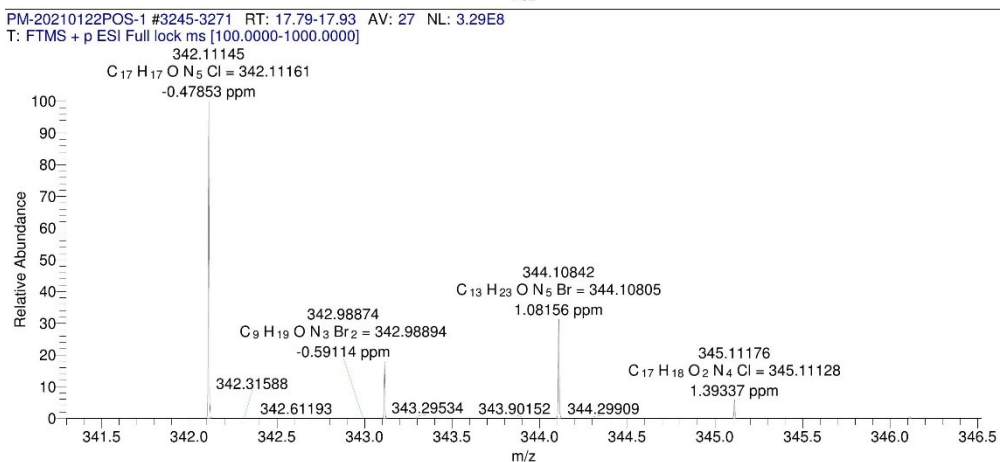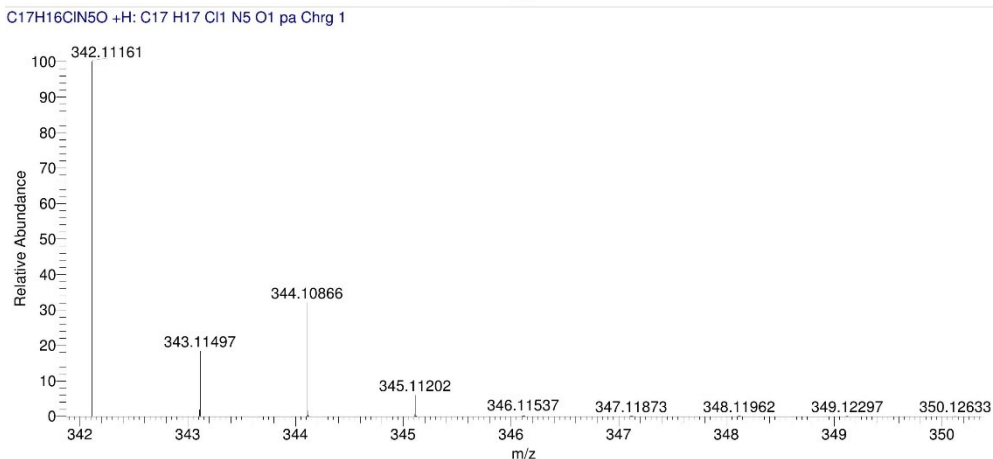



**(*r*-11a,*c*-15a,*c*-16a)-2-Bromo-11a,12,15,15a,16,16a-hexahydrobenzo[5,6][1,2,3]triazolo[5',1':3,4][1,4]diazepino[7,1-*b*]quinazolin-11(9*H*)-one (±)-11c:**

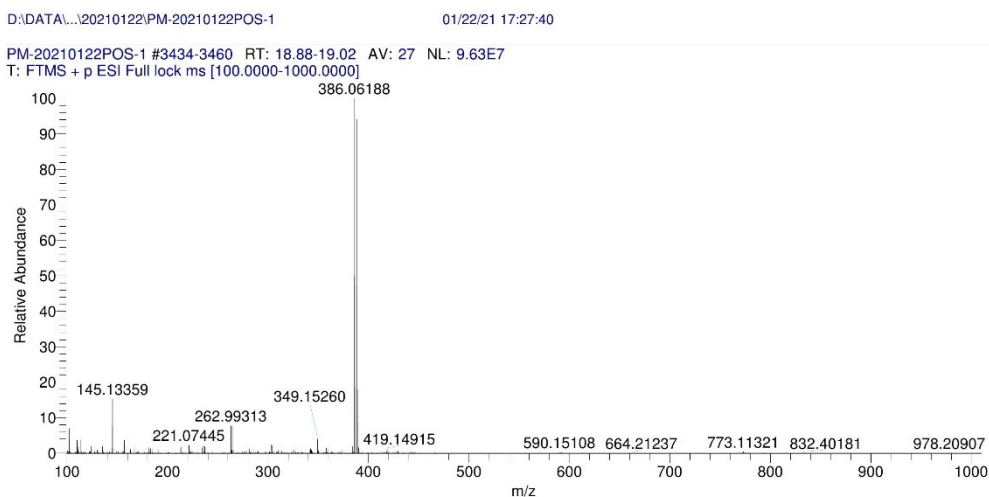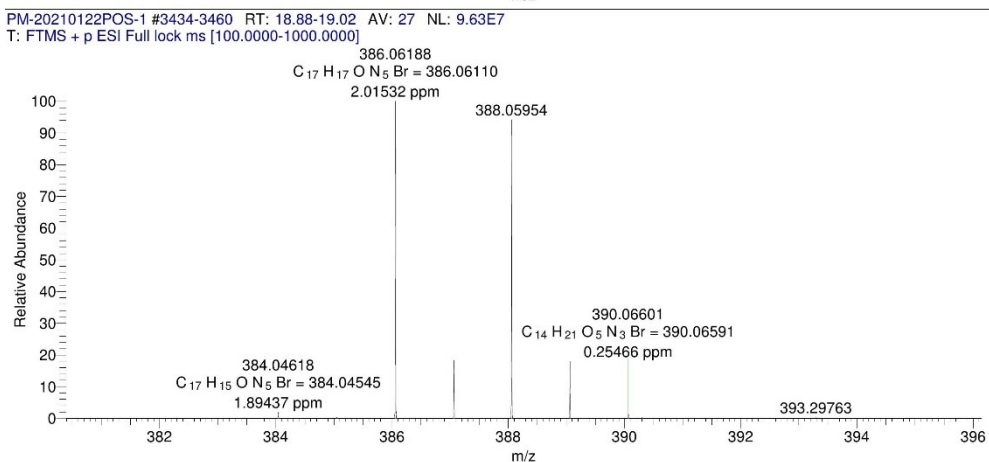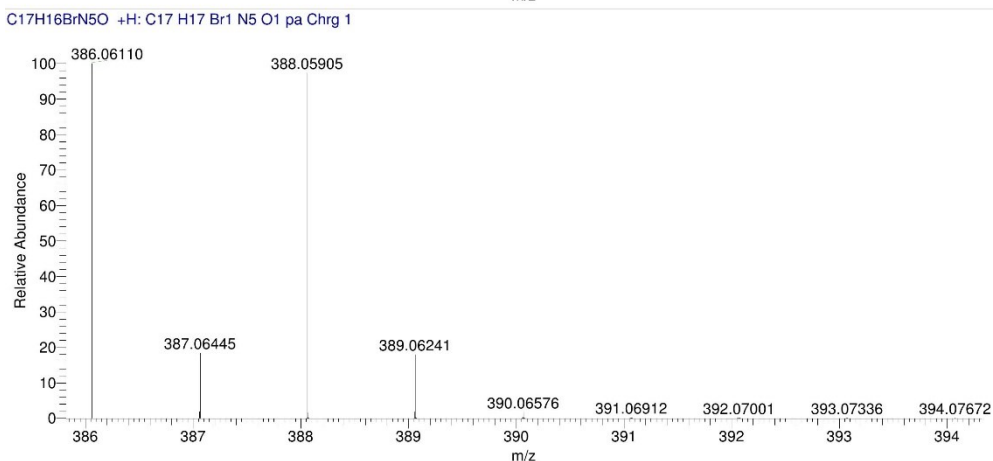

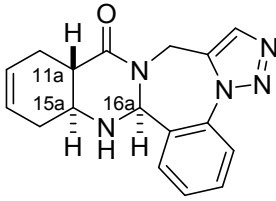

(±)-12a

(*r*-11a,*t*-15a,*t*-16a)-11a,12,15,15a,16,16a-

Hexahydrobenzo[5,6][1,2,3]triazolo[5',1':3,4][1,4]diazepino[7,1-*b*]quinazolin-11(9*H*)-one (±)-12a:

D:\DATA\...20210122\PM-20210122POS-1

01/22/21 17:27:40

PM-20210122POS-1 #3773-3809 RT: 20.87-21.06 AV: 37 NL: 3.00E8  
T: FTMS + p ESI Full lock ms [100.0000-1000.0000]

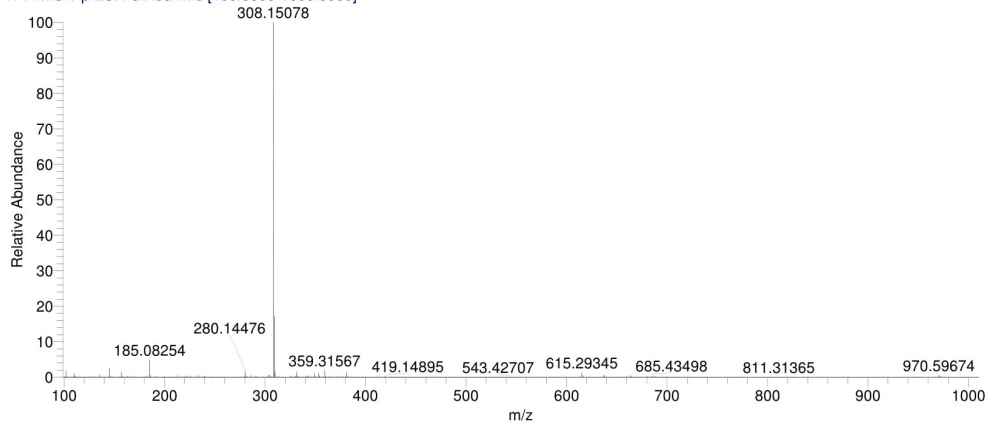

PM-20210122POS-1 #3773-3809 RT: 20.87-21.06 AV: 37 NL: 3.00E8  
T: FTMS + p ESI Full lock ms [100.0000-1000.0000]

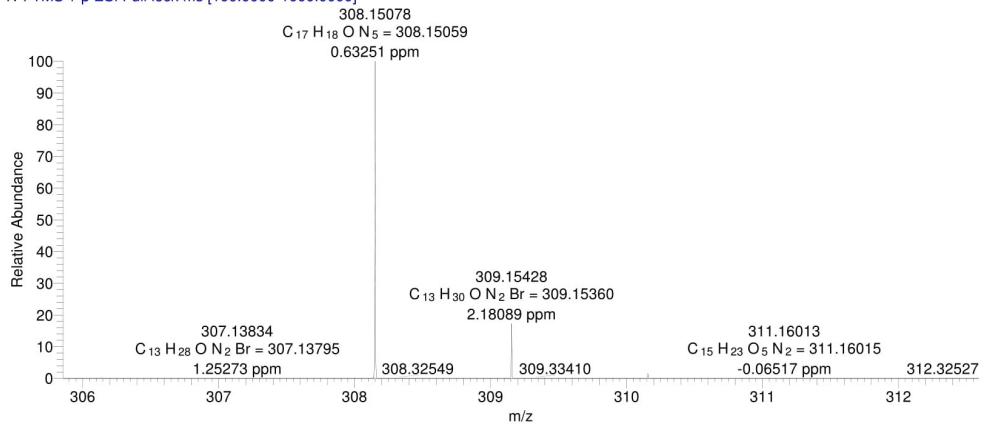

C17H17N5O +H: C17 H18 N5 O1 pa Chrg 1

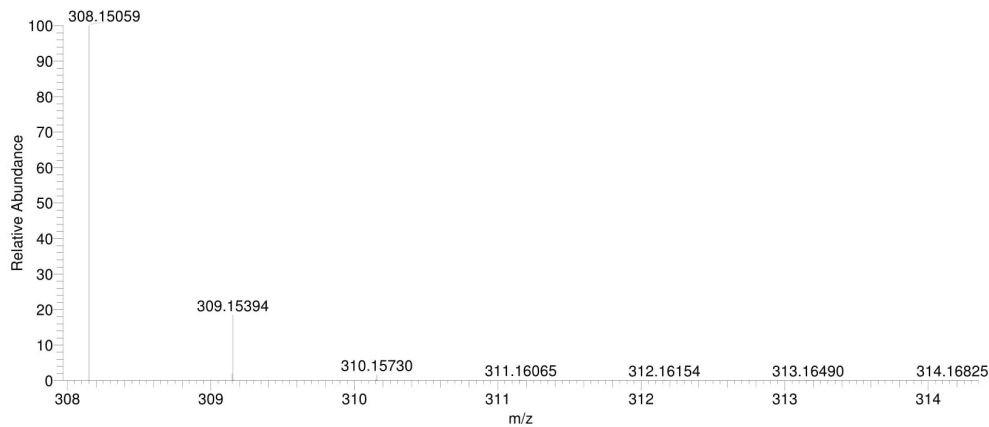

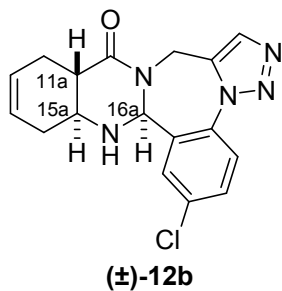

**(*r*-11a,*t*-15a,*t*-16a)-2-Chloro-11a,12,15,15a,16,16a-hexahydrobenzo[5,6][1,2,3]triazolo[5',1':3,4][1,4]diazepino[7,1-*b*]quinazolin-11(9*H*)-one (±)-12b:**

D:\DATA\...20210122\PM-20210122POS-1

01/22/21 17:27:40

PM-20210122POS-1 #4371-4424 RT: 24.37-24.65 AV: 54 NL: 6.48E8  
T: FTMS + p ESI Full lock ms [100.0000-1000.0000]

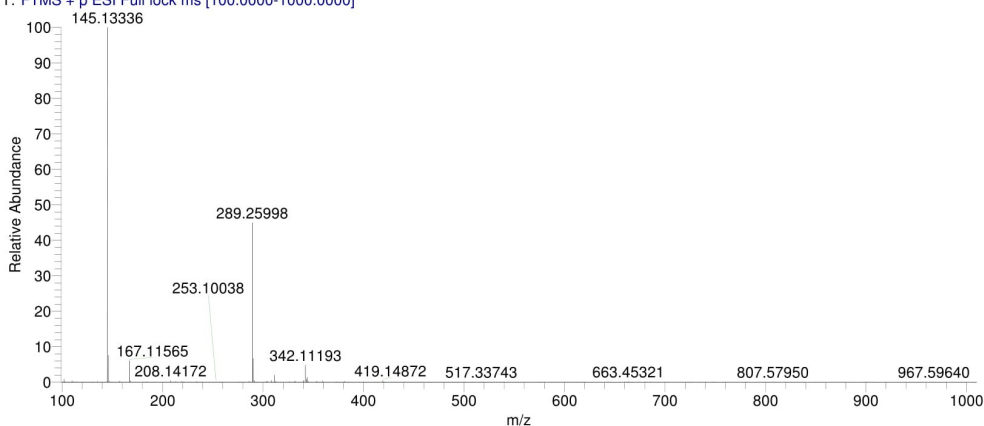

PM-20210122POS-1 #4371-4424 RT: 24.37-24.65 AV: 54 NL: 3.13E7  
T: FTMS + p ESI Full lock ms [100.0000-1000.0000]

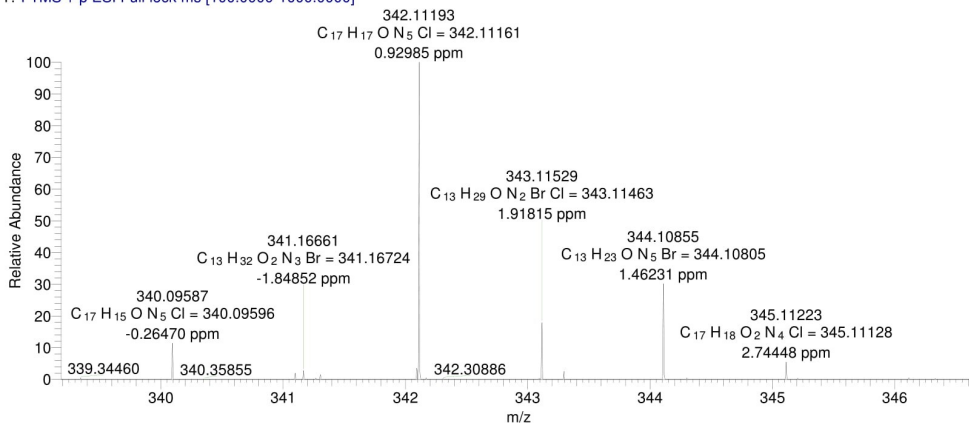

C17H16ClN5O +H: C17 H17 Cl1 N5 O1 pa Chrg 1

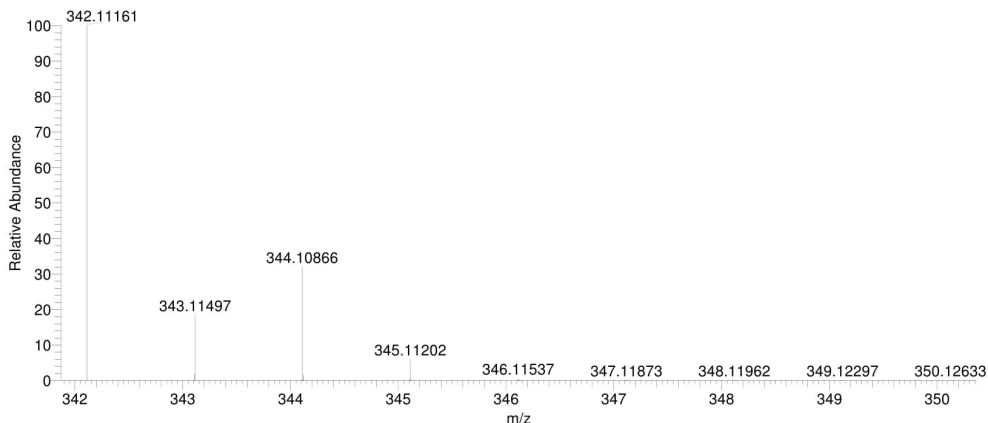

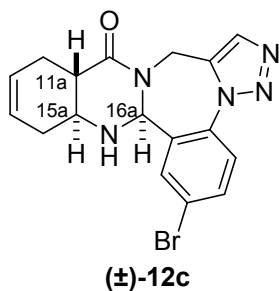

**(*r*-11a,*t*-15a,*t*-16a)-2-Bromo-11a,12,15,15a,16,16a-hexahydrobenzo[5,6][1,2,3]triazolo[5',1':3,4][1,4]diazepino[7,1-b]quinazolin-11(9*H*)-one (±)-12c:**

D:\DATA\...20210122\PM-20210122POS-1

01/22/21 17:27:40

PM-20210122POS-1 #4696-4760 RT: 26.28-26.61 AV: 65 NL: 8.27E8  
T: FTMS + p ESI Full lock ms [100.0000-1000.0000]

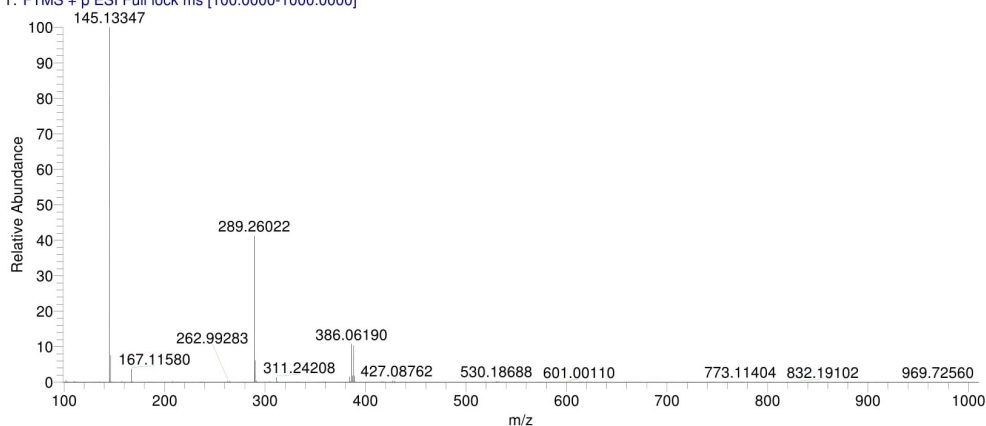

PM-20210122POS-1 #4696-4760 RT: 26.28-26.61 AV: 65 NL: 8.88E7  
T: FTMS + p ESI Full lock ms [100.0000-1000.0000]

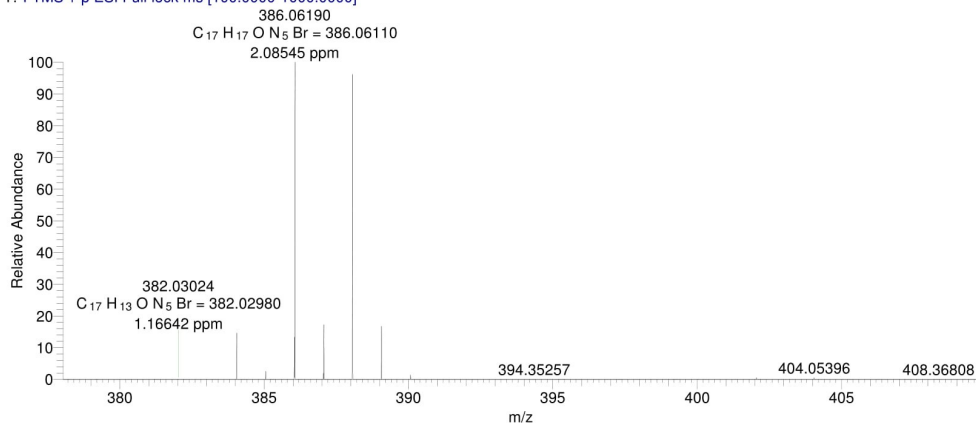

C17H16BrN5O +H: C17H17BrN5O1 pa Chrg 1

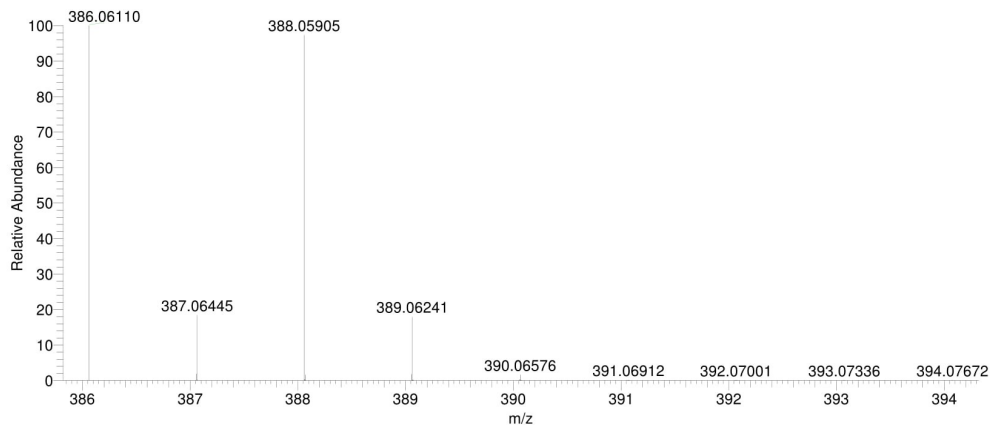



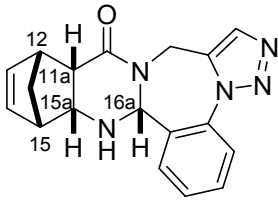

**(±)-17a**

**(*r*-11a,*t*-12,*t*-15,*c*-15a,*c*-16a)-11a,12,15,15a,16,16a-hexahydro-12,15-Methanobenzo[5,6][1,2,3]triazolo[5',1':3,4][1,4]diazepino[7,1-*b*]quinazolin-11(9*H*)-one (±)-17a:**

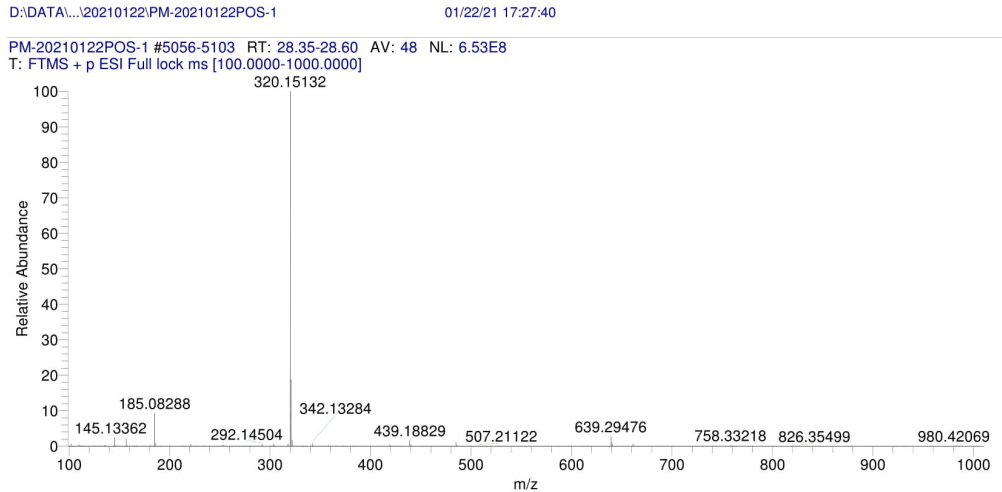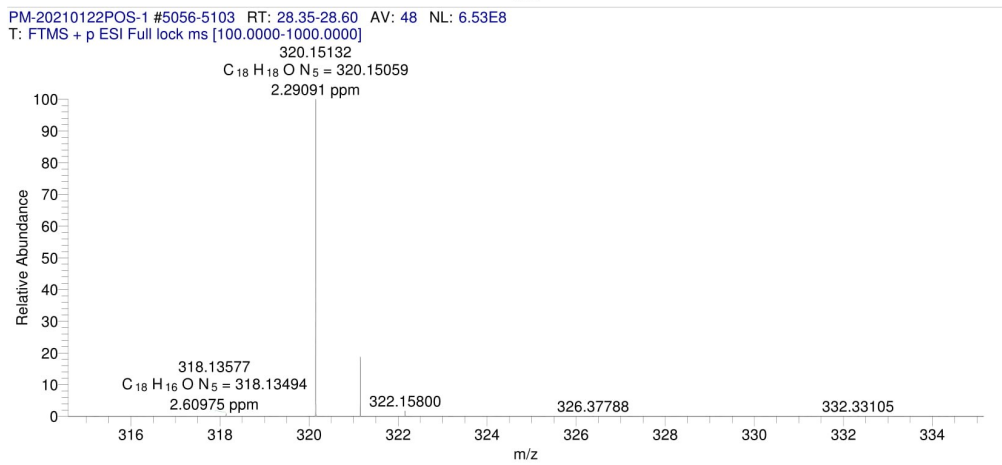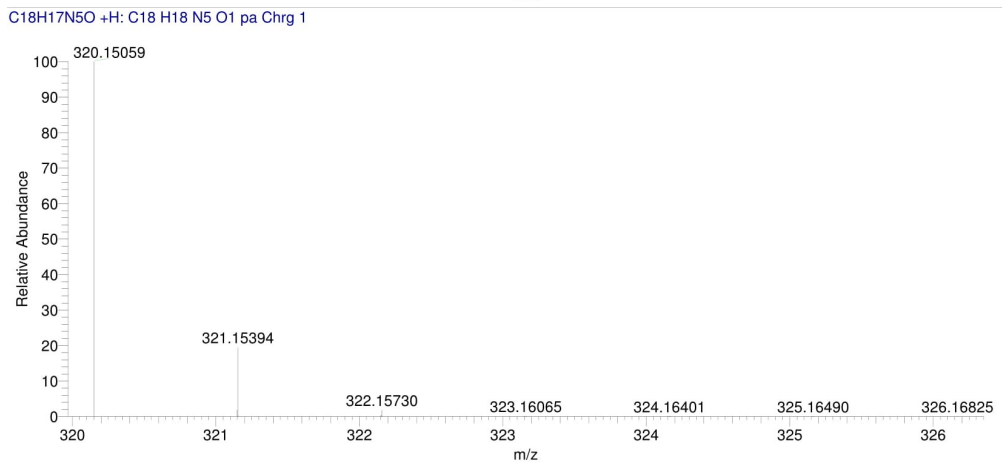

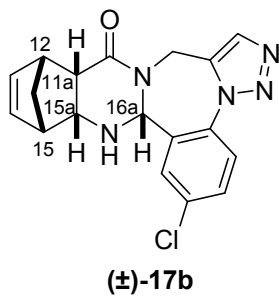

**(*r*-11a,*t*-12,*t*-15,*c*-15a,*c*-16a)-2-Chloro-11a,12,15,15a,16,16a-hexahydro-12,15-methanobenzo[5,6][1,2,3]triazolo[5',1':3,4][1,4]diazepino[7,1-*b*]quinazolin-11(9*H*)-one (±)-17b:**

D:\DATA\...20210122\PM-20210122POS-1

01/22/21 17:27:40

PM-20210122POS-1 #5783-5825 RT: 32.49-32.72 AV: 43 NL: 1.77E8

T: FTMS + p ESI Full lock ms [100.0000-1000.0000]

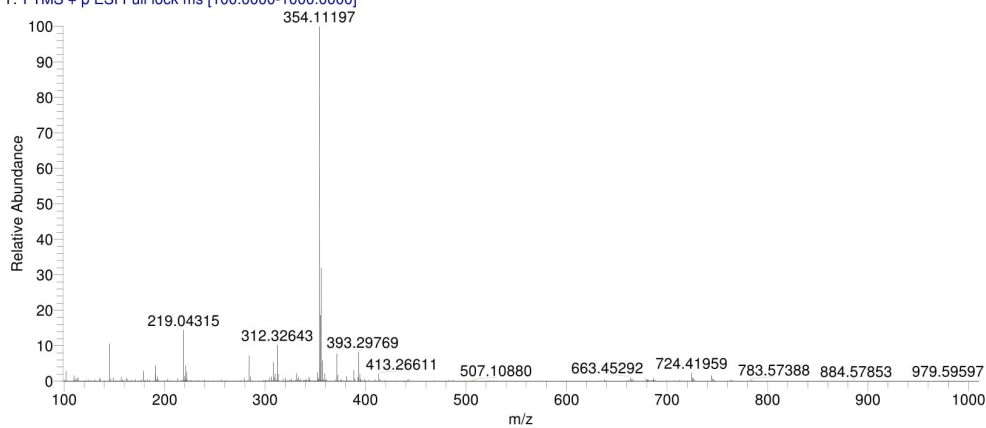

PM-20210122POS-1 #5783-5825 RT: 32.49-32.72 AV: 43 NL: 1.77E8

T: FTMS + p ESI Full lock ms [100.0000-1000.0000]

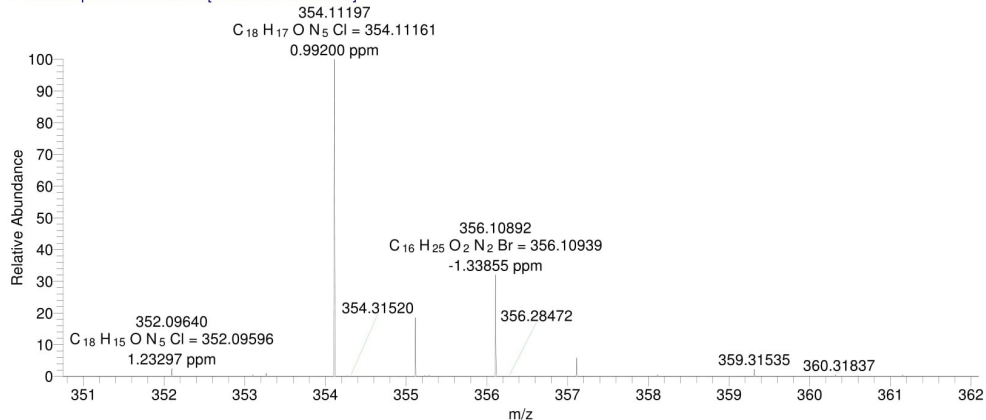

C18H16ClN5O +H: C18 H17 Cl N5 O1 pa Chrg 1

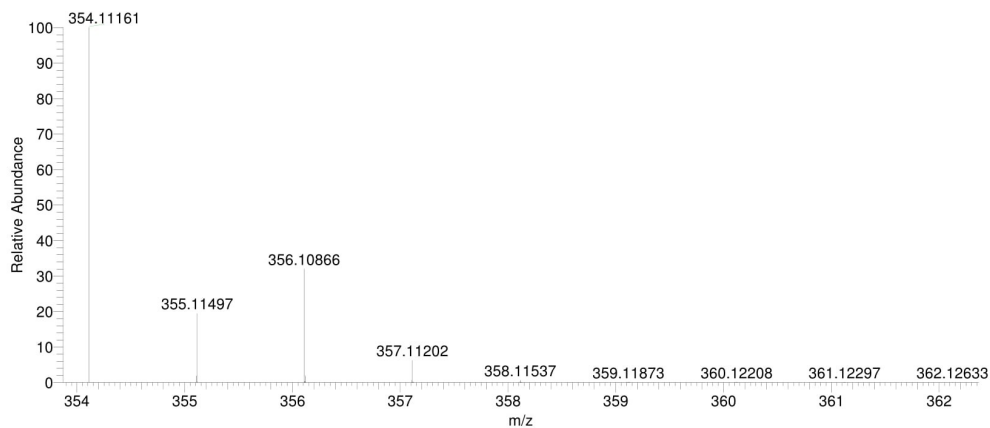

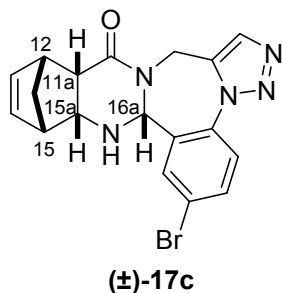

**(*r*-11a,*t*-12,*t*-15,*c*-15a,*c*-16a)-2-Bromo-11a,12,15,15a,16,16a-hexahydro-12,15-methanobenzo[5,6][1,2,3]triazolo[5',1':3,4][1,4]diazepino[7,1-*b*]quinazolin-11(9*H*)-one (±)-17c:**

D:\DATA\...20210122\PM-20210122POS-1

01/22/21 17:27:40

PM-20210122POS-1 #5405-5436 RT: 30.34-30.51 AV: 32 NL: 6.66E7  
T: FTMS + p ESI Full lock ms [100.0000-1000.0000]

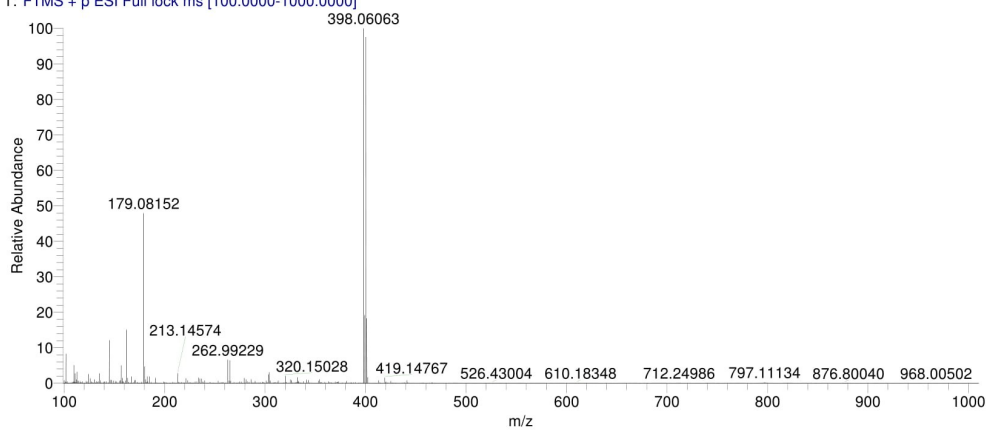

PM-20210122POS-1 #5405-5436 RT: 30.34-30.51 AV: 32 NL: 6.66E7  
T: FTMS + p ESI Full lock ms [100.0000-1000.0000]

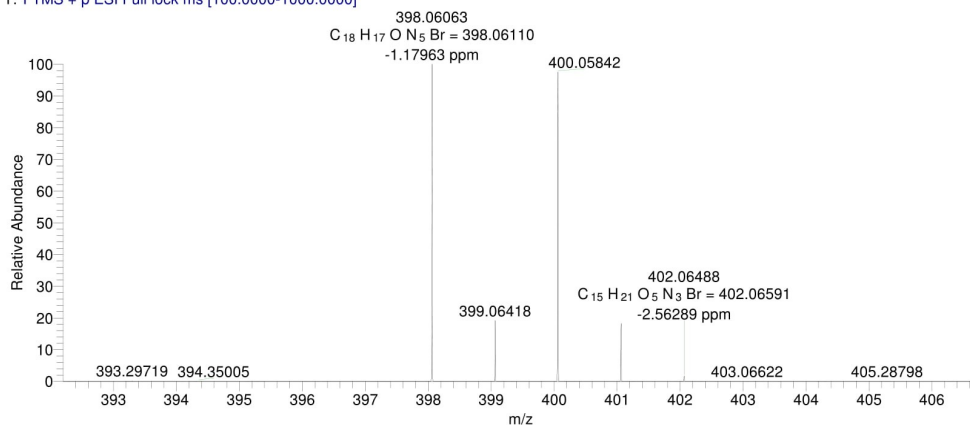

C18H16BrN5O +H: C18 H17 Br1 N5 O1 pa Chrg 1

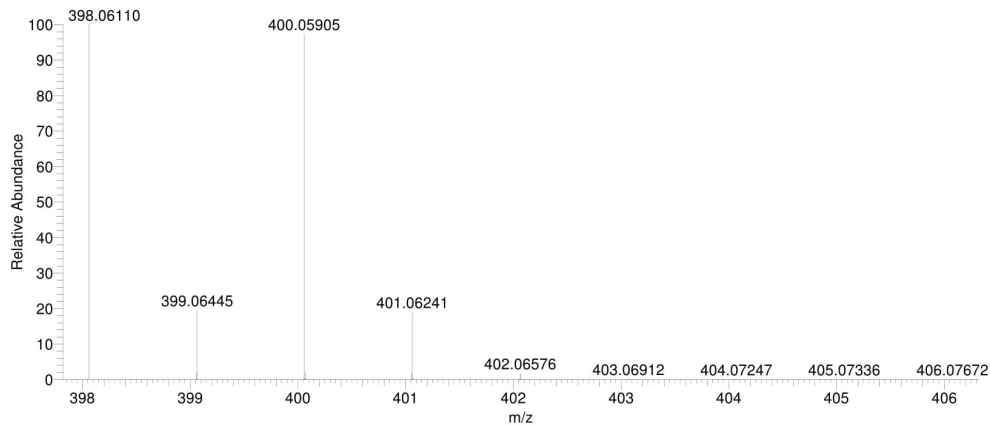

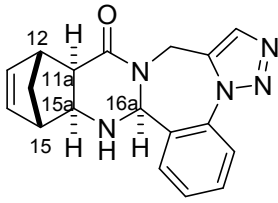

(±)-18a

**(*r*-11a,*c*-12,*c*-15,*c*-15a,*c*-16a)-11a,12,15,15a,16,16a-Hexahydro-12,15  
methanobenzo[5,6][1,2,3]triazolo[5',1':3,4][1,4]diazepino[7,1-*b*]-quinazolin-11(9*H*)-one (±)-18a:**

D:\DATA\...20210122\PM-20210122POS-1 01/22/21 17:27:40

PM-20210122POS-1 #5605-5633 RT: 31.51-31.66 AV: 29 NL: 2.85E8  
T: FTMS + p ESI Full ms [100.0000-1000.0000]

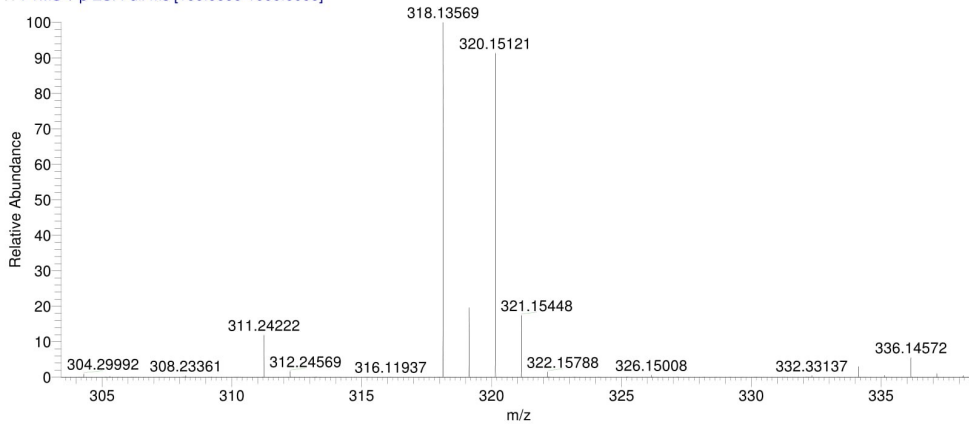

PM-20210122POS-1 #5605-5633 RT: 31.51-31.66 AV: 29 NL: 2.85E8  
T: FTMS + p ESI Full ms [100.0000-1000.0000]

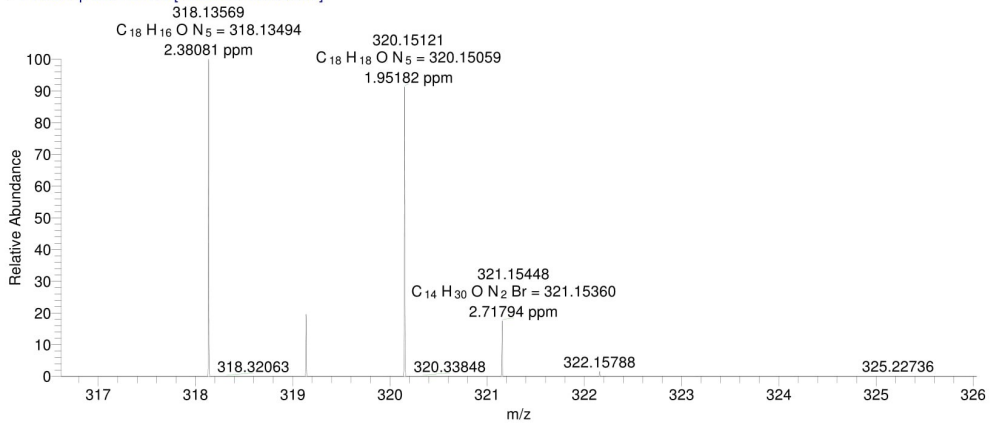

C18H17N5O +H: C18 H18 N5 O1 pa Chrg 1

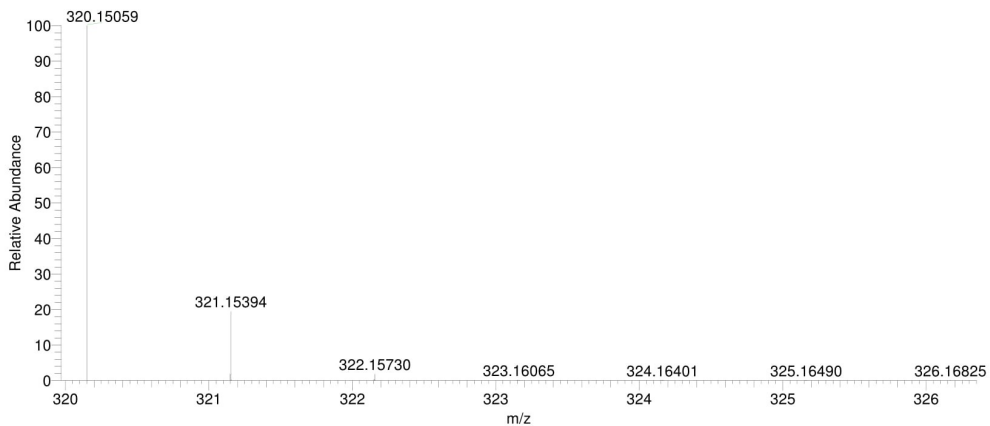

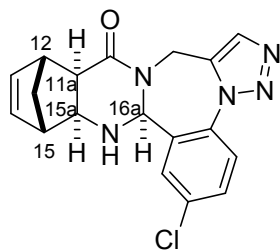

**(±)-18b**

**(*r*-11a,*c*-12,*c*-15,*c*-15a,*c*-16a)-2-Chloro-11a,12,15,15a,16,16a-hexa-hydro-12,15-methanobenzo[5,6][1,2,3]triazolo-[5',1':3,4][1,4]-diazepino[7,1-*b*]quinazolin-11(9*H*)-one (±)-18b :**

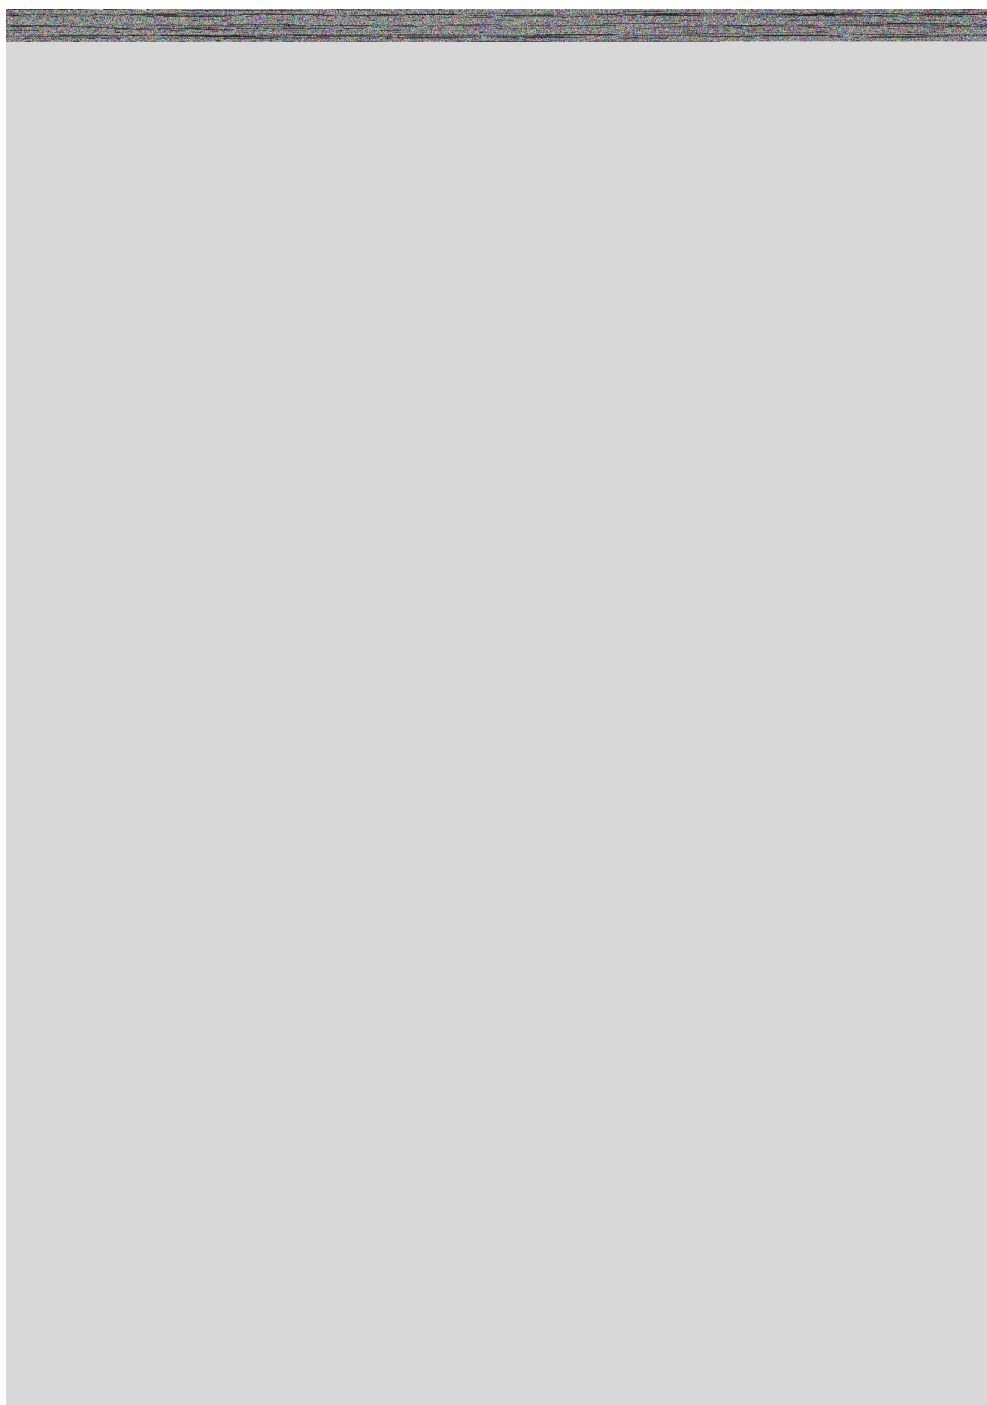

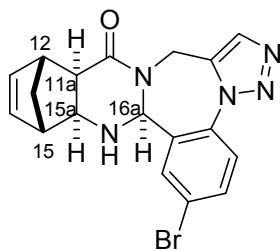

(±)-18c

(*r*-11a,*c*-12,*c*-15,*c*-15a,*c*-16a)-2-Bromo-11a,12,15,15a,16,16a-hexahydro-12,15-methanobenzo[5,6][1,2,3]triazolo[5',1':3,4][1,4]-diazepino[7,1-*b*]quinazolin-11(9*H*)-one (±)-18c:

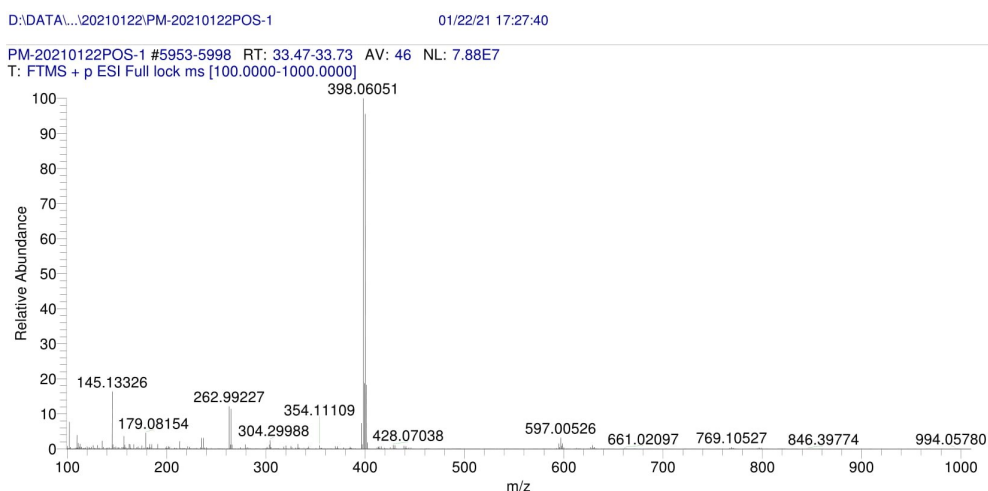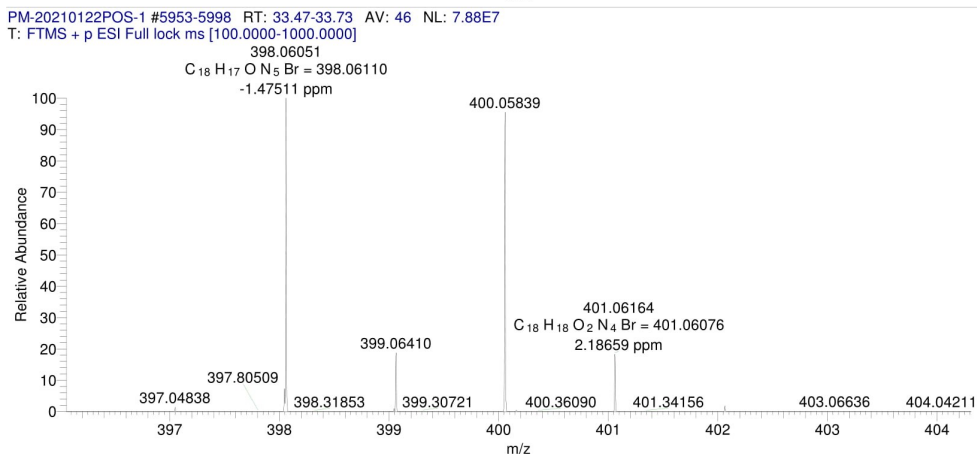

C18H16BrN5O +H: C18 H17 Br1 N5 O1 pa Chrg 1

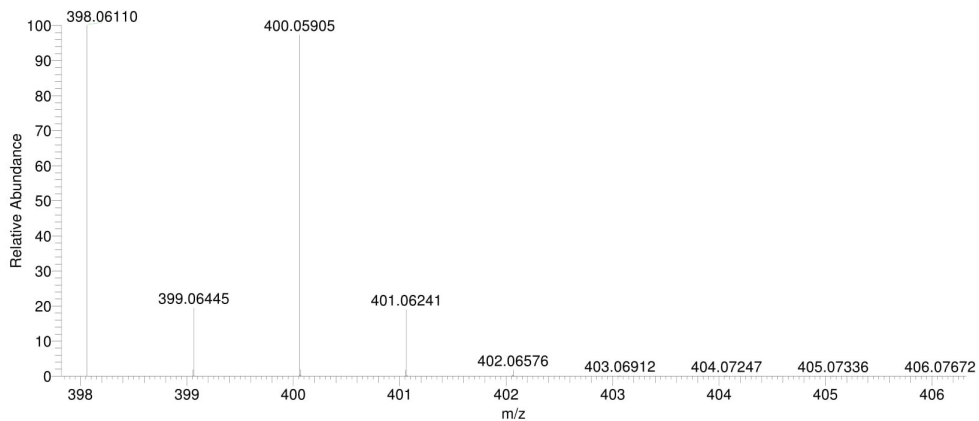

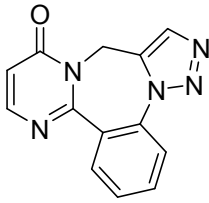

19

**9H-Benzo[f]pyrimido[1,2-d][1,2,3]triazolo[1,5-a][1,4]diazepin-11-one 19:**

D:\DATA\...20210122\PM-20210122POS-1

01/22/21 17:27:40

PM-20210122POS-1 #6129-6161 RT: 34.51-34.68 AV: 33 NL: 2.93E8  
T: FTMS + p ESI Full lock ms [100.0000-1000.0000]

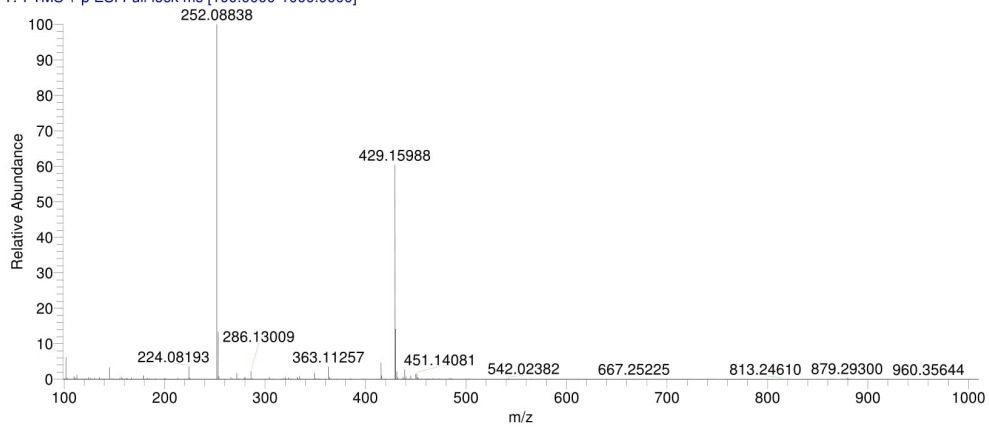

PM-20210122POS-1 #6129-6161 RT: 34.51-34.68 AV: 33 NL: 2.93E8  
T: FTMS + p ESI Full lock ms [100.0000-1000.0000]

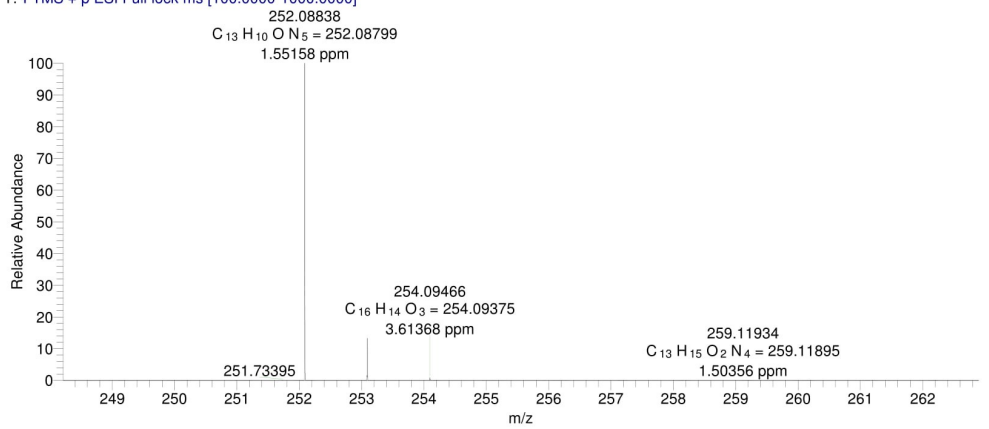

C13H9N5O +H: C13 H10 N5 O1 pa Chrg 1

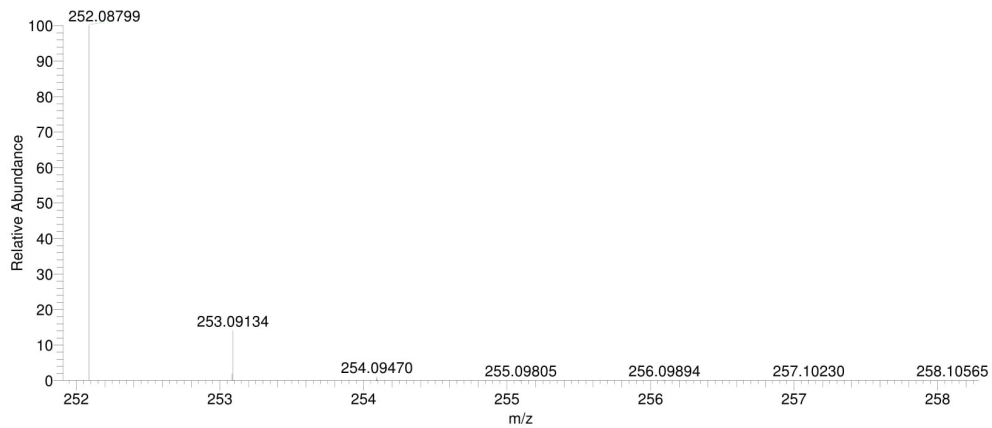

Supplement: d0ra10553h1.pdf [file d0ra10553h1.pdf]
